# Supplementary material
Source: publisher figshare collection journal article supplement (https://acs.figshare.com/ndownloader/files/4053856)

Supporting Information for

# Synthesis of the C1-C21 Domain of Azaspiracid-3

Zhigao Zhang, Yue Ding, Jianyan Xu, Yong Chen, and Craig J. Forsyth<sup>\*</sup>

*Department of Chemistry & Biochemistry, The Ohio State University, Columbus, Ohio 43210*

[forsyth@chemistry.ohio-state.edu](mailto:forsyth@chemistry.ohio-state.edu)

## Contents

**General Methods**

**Experimental Procedures and Characterization Data**

**Literature References**

**<sup>1</sup>H NMR and <sup>13</sup>C NMR Spectra for all New Compounds**

**General Methods:**

Unless otherwise noted, all reactions were carried out under an argon atmosphere in over-dried glassware using standard syringe, cannula, and septa techniques. Dichloromethane, tetrahydrofuran, diethyl ether, toluene, and dimethylformamide were purified with a Pure Solv MD-6 solvent purification system. Triethylamine, diisopropylethylamine, acetonitrile, methanol were distilled from calcium hydride under nitrogen. All other solvents were used as received.

Analytical thin layer chromatography (TLC) was performed using 0.25 mm Silicycle silica gel 60 F<sub>254</sub> plates. Solvents for chromatography are listed as volume: volume ratios. Optical rotations were measured on a Perkin-Elmer polarimeter. Nuclear magnetic resonance (NMR) spectra were recorded on a Bruker DPX 400 spectrometer, operating at 400 MHz for <sup>1</sup>H NMR and 100 MHz for <sup>13</sup>C NMR. Chemical shifts are reported in ppm on the  $\delta$  scale relative to residual CHCl<sub>3</sub> ( $\delta$  = 7.28 for <sup>1</sup>H NMR and  $\delta$  = 77.2 for <sup>13</sup>C NMR) as an internal reference. The coupling constant values (*J*) are in Hertz (Hz). The following abbreviations have been used for signal multiplicities: s, singlet; d, doublet; t, triplet; q, quartet; m, multiplet; and br, broad. ESI mass spectra were measured on a Bruker MicroOTOF instrument.

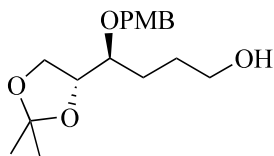

11

**(S)-4-((R)-2,2-Dimethyl-1,3-dioxolan-4-yl)-4-((4-methoxybenzyl)oxy)butan-1-ol (11).**

To a solution of **8**<sup>1</sup> (10.8 g, 37 mmol) in THF (200 mL) at 0 °C was added dropwise BH<sub>3</sub> (37.0 mL, 1.0 M in THF, 37 mmol). After 2 h at rt, the reaction mixture was cooled to 0 °C. Water (4.0 mL), 3 M aqueous NaOH (13.2 mL) and 30% aqueous H<sub>2</sub>O<sub>2</sub> (8.7 mL) were added sequentially. The mixture was stirred for 2 h at rt then diluted with water (200 mL). The pH was adjusted to 6-7 with 10% aqueous HCl. The aqueous phase was extracted with diethyl ether (3 x 200 mL) and the combined organic phase was washed with saturated aqueous NaHCO<sub>3</sub> and brine. The organic phase was dried over anhydrous Na<sub>2</sub>SO<sub>4</sub>, filtered, and concentrated. The residue was purified by flash chromatography (hexanes-ethyl acetate, 3:1, v/v) to provide alcohol **11** (7.94 g, 26 mmol, 70%) as a colorless oil: R<sub>f</sub> = 0.33 (hexanes-ethyl acetate, 1:1, v/v); <sup>1</sup>H NMR (CDCl<sub>3</sub>, 400 MHz): δ 7.26 (d, *J* = 8.6 Hz, 2H), 6.88 (d, *J* = 8.6 Hz), 4.59 (q<sub>AB</sub>, Δ*v* = 16 Hz, *J*<sub>AB</sub> = 11 Hz, 2H), 4.12 (q, *J* = 6.2 Hz, 1H), 4.06 (dd, *J* = 6.4 Hz, 1.6 Hz, 1H), 3.88 (dd, *J* = 6.4 Hz, 1.5 Hz, 1H), 3.82 (s, 3H), 3.64 (m, 2H), 3.57 (td, *J* = 6.0 Hz, 3.2 Hz, 1H), 1.72 (m, 3H), 1.63 (m, 3H), 1.44 (s, 3H), 1.37 (s, 3H); <sup>13</sup>C NMR (CDCl<sub>3</sub>, 125 MHz): δ 159.3, 130.3, 129.5, 113.8, 109.1, 78.58, 77.5, 72.3, 66.6, 62.9, 55.3, 28.1, 27.4, 26.6, 25.23; IR (neat): 3436, 2935, 1612, 1513, 1454, 1370, 1301, 1248, 1069 cm<sup>-1</sup>; [α]<sub>D</sub><sup>25</sup> + 17.1 (*c* 1.56, CHCl<sub>3</sub>); HRMS-ESI(*m/z*) calculated for [M+Na]<sup>+</sup> 333.1673, found 333.1687.

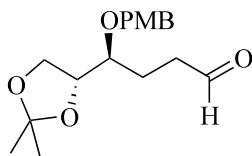

12

**(S)-4-((R)-2,2-Dimethyl-1,3-dioxolan-4-yl)-4-((4-methoxybenzyl)oxy)butanal (12).**

To a solution of oxalyl chloride (2.3 mL, 26 mmol) in CH<sub>2</sub>Cl<sub>2</sub> (100 mL) at -78 °C was added dropwise DMSO (3.6 mL, 52 mmol). After 20 min at -78 °C, a solution of **11** (4.0

g, 13 mmol) in CH<sub>2</sub>Cl<sub>2</sub> (30 mL) was added, then the solution was warmed to -60 °C. After 1 h at -60 °C, *i*-Pr<sub>2</sub>NEt (13.5 mL, 77.4 mmol) was added. The mixture was stirred for 10 min at -60 °C and 10 min at 0 °C. Cold 1 M aqueous HCl solution (48 mL) was added. The organic phase was mixed with pH 7 aqueous buffer. The aqueous phase was extracted with CH<sub>2</sub>Cl<sub>2</sub> (3 x 50 mL). The combined organic phases were washed with brine and dried over anhydrous Na<sub>2</sub>SO<sub>4</sub>, filtered, and concentrated. The residue was purified by flash chromatography (hexanes-ethyl acetate, 5:1, v/v) to provide aldehyde **12** (3.92 g, 12.7 mmol, 99%) as a colorless oil: *R*<sub>f</sub> = 0.8 (hexanes-ethyl acetate, 1:1, v/v); <sup>1</sup>H NMR (CDCl<sub>3</sub>, 400 MHz): δ 9.75 (t, *J* = 1.44 Hz, 1H), 7.26 (d, *J* = 8.7 Hz, 2H), 6.90 (d, *J* = 8.6 Hz, 2H), 4.54 (q<sub>AB</sub>, Δ*v* = 19 Hz, *J*<sub>AB</sub> = 11.1 Hz, 2H), 4.08 (m, 2H), 3.86 (m, 1H), 3.82 (s, 3H), 3.54 (m, 1H), 2.55 (t, *J* = 7.2 Hz, 2H), 2.01 (m, 1H), 1.85 (m, 1H), 1.42 (s, 3H), 1.36 (s, 3H); <sup>13</sup>C NMR (CDCl<sub>3</sub>, 125 MHz): 202.1, 159.4, 130.1, 129.6, 113.9, 109.2, 77.7, 72.2, 66.6, 55.3, 39.3, 26.6, 25.2, 23.3; IR (neat): 2984.3, 2930.1, 2883.6, 1721.5, 1613.0, 1512.3, 1307.7, 1248.7, 1070.7, 1032.0, 846.0; [α]<sub>D</sub><sup>25</sup> + 8.14 (*c* 1.5, CHCl<sub>3</sub>); HRMS-ESI(*m/z*) calculated for [M+Na]<sup>+</sup>: 331.1516, found 331.1521.

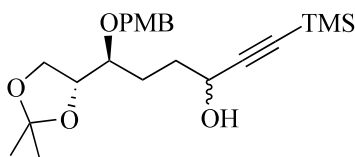

**12a**

**(3R/S,6S)-6-((R)-2,2-Dimethyl-1,3-dioxolan-4-yl)-6-((4-methoxybenzyl)oxy)-1-(trimethylsilyl)hex-1-yn-3-ol (12a).**

To a solution of trimethylsilylacetylene (6.22 mL, 43.8 mmol) in THF (130 mL) at -78 °C was added dropwise a solution of *n*-BuLi (15.7 mL, 2.5 M in THF, 40 mmol). After 30 min at -78 °C, a solution of **12** (4.5 g, 15 mmol) in THF (16 mL) was added slowly. The solution was allowed to stir for 1 h before saturated aqueous NH<sub>4</sub>Cl was added. The aqueous phase was extracted with diethyl ether (3 x 80 mL). The combined organic phase was washed with brine, dried over anhydrous Na<sub>2</sub>SO<sub>4</sub>, filtered, and concentrated. The residue was purified by flash chromatography (hexanes-ethyl acetate, 4:1, v/v) to provide **12a** (5.0 g, 13 mmol, 87%) as a colorless oil:

$R_f = 0.43$  (hexanes-ethyl acetate, 3:1 v/v);  $^1\text{H}$  NMR ( $\text{CDCl}_3$ , 400 MHz):  $\delta$  7.29 (m, 2H), 6.90 (d,  $J = 8.5$  Hz, 2H), 4.57 (m, 2H), 4.40 (q, 1H), 4.08 (m, 2H), 3.88 (m, 1H), 3.82 (s, 3H), 3.57 (m, 1H), 1.90 (m, 5H), 1.43 (d, 3H), 1.36 (d, 3H), 0.19 (d, 9H);  $^{13}\text{C}$  NMR ( $\text{CDCl}_3$ , 125 MHz):  $\delta$  159.33, 159.27, 130.30, 130.06, 129.66, 129.51, 113.84, 113.82, 109.12, 109.09, 106.76, 106.61, 89.52, 89.42, 78.35, 78.32, 77.29, 71.99, 71.85, 66.86, 66.62, 62.70, 62.55, 55.23, 32.87, 32.44, 26.66, 26.60, 26.23, 25.66, 25.28, 25.26, -0.12, -0.15; IR (neat): 3441.4(broad), 2937.9, 1613.6, 1514.0, 1249.4, 1073.8, 843.5; HRMS-ESI( $m/z$ ) calculated for  $[\text{M}+\text{Na}]^+$ : 429.2068, found 429.2060.

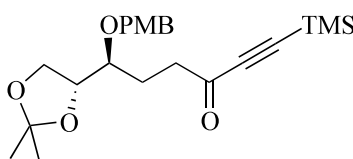

**13**

**(S)-6-((R)-2,2-Dimethyl-1,3-dioxolan-4-yl)-6-((4-methoxybenzyl)oxy)-1-(trimethylsilyl)hex-1-yn-3-one (13).**

To a solution of **12a** (4.5 g, 11 mmol) in  $\text{CH}_2\text{Cl}_2$  (100 mL) and DMSO (20 mL) at 0 °C were sequentially added  $\text{Et}_3\text{N}$  (9.2 mL, 67 mmol) and  $\text{SO}_3\cdot\text{Py}$  (7.6g, 48 mmol). After 2 h at 0 °C, saturated aqueous  $\text{NH}_4\text{Cl}$  (100 mL) was added. The aqueous phase was extracted with diethyl ether (3 x 80 mL). The combined organic phase was washed with brine, dried over anhydrous  $\text{Na}_2\text{SO}_4$ , filtered, and concentrated. The residue was purified by flash chromatography (hexanes-ethyl acetate, 5:1, v/v) to provide ketone **13** (3.7 g, 9.2 mmol, 83%) as colorless oil:  $R_f = 0.57$  (hexanes-ethyl acetate, 3:1, v/v);  $^1\text{H}$  NMR ( $\text{CDCl}_3$ , 400 MHz):  $\delta$  7.27 (d,  $J = 8.6$  Hz, 2H), 6.90 (d,  $J = 8.6$  Hz, 2H), 4.53 (s, 2H), 4.07 (m, 2H), 3.85 (m, 1H), 3.82 (s, 3H), 3.53 (m, 1H), 2.71 (m, 2H), 2.06 (m, 1H), 1.87 (m, 1H), 1.43 (s, 3H), 1.36 (s, 3H), 0.26 (s, 9H);  $^{13}\text{C}$  NMR ( $\text{CDCl}_3$ , 125 MHz):  $\delta$  187.3, 159.3, 130.3, 129.5, 113.9, 109.2, 102.0, 97.8, 77.6, 72.2, 66.7, 55.3, 40.5, 26.6, 25.3, 24.8, -0.8; IR(neat): 2957.5, 2945.6, 2899.2, 1676.8, 1612.3, 1513.8, 1250.7, 1072.8, 847.1, 761.5;  $[\alpha]_D^{25} + 9.56$  (c 0.5,  $\text{CHCl}_3$ ); HRMS (ESI+) calculated for  $[\text{M}+\text{Na}]^+$ : 427.1911, found 427.1903.

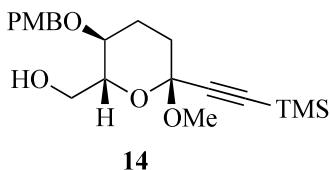

**((2*R*,3*S*,6*R*)-6-Methoxy-3-((4-methoxybenzyl)oxy)-6-((trimethylsilyl)ethynyl)tetrahydro-2*H*-pyran-2-yl)methanol (**14**).**

To a solution of **13** (3.58 g, 8.86 mmol) in methanol (30 mL) was added TsOH·H<sub>2</sub>O (0.17 g, 0.89 mmol). After 2 h, diethyl ether and saturated aqueous NaHCO<sub>3</sub> were added. The aqueous phase was extracted with diethyl ether (3 x 50 mL). The combined organic phase was washed with brine, dried over anhydrous Na<sub>2</sub>SO<sub>4</sub>, filtered, and concentrated. The residue was purified by flash chromatography (hexanes-ethyl acetate, 8:1, v/v) to provide alcohol **14** (2.2 g, 5.8 mmol, 65%) as a colorless oil: *R*<sub>f</sub> = 0.37 (hexanes-ethyl acetate, 3:1, v/v); <sup>1</sup>H NMR (CDCl<sub>3</sub>, 400 MHz): δ 7.26 (d, *J* = 8.5 Hz, 2H), 6.88 (d, *J* = 8.5 Hz, 2H), 4.43 (q<sub>AB</sub>, Δ*v* = 64 Hz, *J*<sub>AB</sub> = 11.2 Hz, 2H), 3.82 (s, 3H), 3.75 (m, 2H), 3.57 (m, 1H), 3.44 (td, *J* = 10.0 Hz, 4.4 Hz, 1H), 3.38 (s, 3H), 3.10 (m, 3H), 1.91 (m, 2H), 0.21 (s, 9H); <sup>13</sup>C NMR (CDCl<sub>3</sub>, 100 MHz): δ 159.3, 130.1, 129.3, 113.9, 101.9, 94.1, 89.0, 73.2, 72.5, 70.3, 62.7, 55.2, 50.4, 35.6, 24.3, -0.27; IR (neat): 3502(broad), 2957, 2899, 1612, 1513, 1250, 1152, 1089, 1040, 846, 760; [α]<sub>D</sub><sup>25</sup> + 6.84 (*c* 2.1, CHCl<sub>3</sub>); HRMS-ESI(*m/z*) calculated for [M+Na]<sup>+</sup>: 401.1755, found 401.1763.

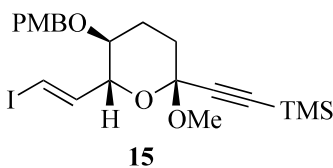

**(((2*R*,5*S*,6*R*)-6-((*E*)-2-Iodovinyl)-2-methoxy-5-((4-methoxybenzyl)oxy)tetrahydro-2*H*-pyran-2-yl)ethynyl)trimethylsilane (**15**).**

To a solution of **14** (1.0 g, 2.7 mmol) in CH<sub>2</sub>Cl<sub>2</sub> (30mL) and DMSO (6 mL) at 0 °C were sequentially added *i*-Pr<sub>2</sub>NEt (2.78 mL, 15.9 mmol) and SO<sub>3</sub>·Py (1.8 g, 11.4 mmol). After 5 min at 0 °C, cold 1 M aqueous HCl (10 mL) was added. The separated organic phase was neutralized with pH 7 aqueous buffer. The aqueous phase was extracted with CH<sub>2</sub>Cl<sub>2</sub> (3 x 30 mL). The combined organic phase was washed with brine, dried over anhydrous Na<sub>2</sub>SO<sub>4</sub>, filtered, and concentrated. The residue was purified by flash chromatography

(hexanes-ethyl acetate, 4:1, v/v) to provide the aldehyde ((2*R*,3*S*,6*R*)-6-methoxy-3-((4-methoxybenzyl)oxy)-6-((trimethylsilyl)ethynyl)tetrahydro-2*H*-pyran-2-yl)methanal as a colorless oil (0.99 g, 2.6 mmol, 96%). A solution of the aldehyde (0.99 g, 2.6 mmol) and CHI<sub>3</sub> (1.56 g, 3.96 mmol) in 1,4-dioxane (4 mL) was added dropwise via cannula to a 0 °C stirred suspension of powdered anhydrous CrCl<sub>2</sub> (1.95 g, 15.9 mmol) in THF (24 mL). The mixture was allowed to warm to rt over 3 h. After stirring for an additional 9 h, saturated aqueous NaHCO<sub>3</sub> was added. The separated aqueous phase was extracted with diethyl ether (3 x 30 mL). The combined organic phase was washed with brine, dried over anhydrous Na<sub>2</sub>SO<sub>4</sub>, filtered and concentrated. The residue was purified by flash chromatography (hexanes-ethyl acetate, 40:1, v/v) to provide vinyl iodide **15** (0.8 g, 2 mmol, 75%) as a colorless oil: *R*<sub>f</sub> = 0.60 (hexanes-ethyl acetate, 5:1, v/v); <sup>1</sup>H NMR (CDCl<sub>3</sub>, 400 MHz): δ 7.25 (d, *J* = 8.6 Hz, 2H), 6.92 (d, *J* = 8.6 Hz, 2H), 6.65 (dd, *J* = 14.8 Hz, 6.4 Hz, 1H), 6.51 (dd, *J* = 14.8 Hz, 1.2 Hz, 1H), 4.53 (q<sub>AB</sub>, Δ*v* = 54 Hz, *J*<sub>AB</sub> = 11.3 Hz, 2H), 3.91 (ddd, *J* = 6.2 Hz, 3.3 Hz, 1.1 Hz, 1H), 3.83 (s, 3H), 3.36 (s, 3H), 3.21 (td, *J* = 10 Hz, 4.4 Hz, 1H), 2.11 (m, 1H), 1.91 (m, 3H), 0.20 (s, 9H); <sup>13</sup>C NMR (CDCl<sub>3</sub>, 100 MHz): δ 159.3, 143.2, 130.1, 129.4, 113.9, 101.7, 94.1, 89.1, 79.8, 75.2, 75.1, 70.8, 55.3, 50.5, 35.5, 24.8, -0.03; IR (neat): 2955, 1513, 1249, 1085, 1043, 944, 859, 844, 760; [α]<sub>D</sub><sup>25</sup> + 6.57 (*c* 1.6, CHCl<sub>3</sub>); HRMS-ESI(*m/z*) calculated for [M+Na]<sup>+</sup>: 523.0772, found 523.0765.

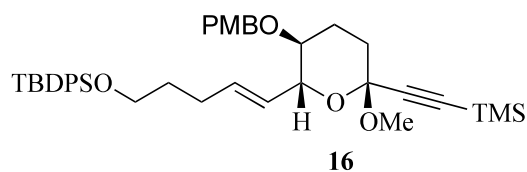

***tert*-Butyl(((*E*)-5-((2*R*,3*S*,6*R*)-6-methoxy-3-((4-methoxybenzyl)oxy)-6-((trimethylsilyl)ethynyl)tetrahydro-2*H*-pyran-2-yl)pent-4-en-1-yl)oxy)diphenylsilane (**16**).**

To a solution of 3-(*O*-*tert*-butyldimethylsilyl)oxy-propene (720 mg, 2.4 mmol) in THF (13 mL) at 0 °C was slowly added a solution of 9-BBN (6.4 mL, 0.5 M in THF, 3.2 mmol). The solution was slowly warmed to rt then stirred at rt for 2 h. To this solution was added a solution of 3 M aqueous K<sub>3</sub>PO<sub>4</sub> (1.06 mL, 1.2 mmol) in DMF (1.1 mL). After stirring for 30 min at rt, the mixture was added to a mixture of vinyl iodide (600 mg, 1.2 mmol) and PdCl<sub>2</sub>(dppf)·CH<sub>2</sub>Cl<sub>2</sub> (98 mg, 0.12 mmol) via cannula. After 5 min

diethyl ether (10 mL) and H<sub>2</sub>O (10 mL) were added. The separated aqueous phase was extracted with diethyl ether (3 x 10 mL). The combined organic phase was washed with brine, dried over anhydrous Na<sub>2</sub>SO<sub>4</sub>, filtered and concentrated. The residue was purified by flash chromatography (hexanes-ethyl acetate, 40:1, v/v) to provide **16** (760 mg, 1.16 mmol, 95%) as a colorless oil: *R*<sub>f</sub> = 0.62 (hexanes-ethyl acetate, 5:1, v/v); <sup>1</sup>H NMR (CDCl<sub>3</sub>, 400 MHz): δ 7.69 (dd, *J* = 7.8 Hz, 1.6 Hz, 4H), 7.42 (m, 6H), 7.22 (d, *J* = 8.6 Hz, 2H), 6.86 (d, *J* = 8.6 Hz, 2H), 5.85 (dt, *J* = 15.4 Hz, 6.8 Hz, 1H), 5.52 (dd, *J* = 15.2 Hz, 7.6 Hz, 1H), 4.50 (q<sub>AB</sub>, Δ*v* = 25 Hz, *J*<sub>AB</sub> = 11.3 Hz, 2H), 3.88 (t, *J* = 8.1 Hz, 1H), 3.79 (s, 3H), 3.71 (t, *J* = 6.3 Hz, 2H), 3.38 (s, 3H), 3.20 (td, *J* = 9.5 Hz, 4.5 Hz, 1H), 2.22 (q, *J* = 6.4 Hz, 2H), 2.10 (m, 1H), 1.97 (m, 2H), 1.87 (m, 1H), 1.71 (m, 2H), 1.08 (s, 9H), 0.20 (s, 9H); <sup>13</sup>C NMR (CDCl<sub>3</sub>, 100 MHz): δ 159.1, 135.6, 134.9, 134.0, 130.5, 129.5, 129.3, 127.9, 127.6, 113.7, 102.3, 94.0, 88.5, 75.7, 74.6, 70.9, 63.5, 55.2, 50.4, 35.9, 31.9, 28.9, 26.9, 25.1, 19.2, -0.2; IR (neat): 2933.1, 2856.8, 1612.0, 1513.0, 1249.5, 1109.9, 844.2, 702.5; [α]<sub>D</sub><sup>25</sup> + 4.32 (*c* 1.6, CHCl<sub>3</sub>); HRMS-ESI(*m/z*) calculated for [M+Na]<sup>+</sup>: 693.3402, found 693.3434.

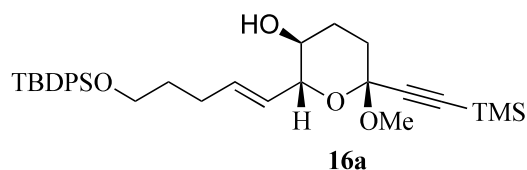

**(2*R*,3*S*,6*R*)-2-((*E*)-5-((*tert*-Butyldiphenylsilyl)oxy)pent-1-en-1-yl)-6-methoxy-6-((trimethylsilyl)ethynyl)tetrahydro-2*H*-pyran-3-ol (16a).**

To a stirred, rt mixture of **16** (406 mg, 0.60 mmol) in CH<sub>2</sub>Cl<sub>2</sub> (10 mL), pH 7 aqueous buffer (1 mL), and *tert*-butanol (0.5 mL) was added DDQ (412 mg, 1.8 mmol). After 10 min, diethyl ether (10 mL) and saturated aqueous NaHCO<sub>3</sub> (15 mL) were added. The separated aqueous phase was extracted with diethyl ether (3 x 15 mL). The combined organic phase was washed with brine, dried over anhydrous Na<sub>2</sub>SO<sub>4</sub>, filtered and concentrated. The residue was purified by flash chromatography (hexanes-ethyl acetate, 20:1, v/v) to provide **16a** (299 mg, 0.54 mmol, 90%) as a colorless oil: *R*<sub>f</sub> = 0.62 (hexanes-ethyl acetate, 3:1, v/v); <sup>1</sup>H NMR (CDCl<sub>3</sub>, 400 MHz): δ 7.69 (dd, *J* = 7.7 Hz, 1.6 Hz, 4H), 7.42 (m, 6H), 5.87 (dt, *J* = 15.4 Hz, 6.6 Hz, 1H), 5.50 (dd, *J* = 15.6 Hz, 8.4 Hz, 1H), 3.71 (m, 1H), 3.40 (m, 4H), 2.23 (q, *J* = 6.8 Hz 2H), 2.12 (m, 1H), 2.06 (td, *J* = 13



Hz, 4.3 Hz, 1H), 1.94 (m, 1H), 1.85 (m, 1H), 1.70 (m, 2H), 1.54 (d,  $J = 3.0$  Hz, 1H), 1.07 (s, 9H), 0.21 (s, 9H);  $^{13}\text{C}$  NMR ( $\text{CDCl}_3$ , 125 MHz):  $\delta$  137.2, 135.6, 134.0, 129.6, 127.6, 127.2, 102.1, 94.1, 88.8, 76.7, 68.6, 63.2, 50.5, 35.9, 31.7, 28.8, 26.9, 26.8, 19.2, -0.2; IR (neat): 3420.1 (broad), 3070.8, 2933.8, 2858.0, 1428.2, 1251.1, 1111.3, 1049.6, 944.6, 860.0, 702.1;  $[\alpha]_{\text{D}}^{25} + 5.48$  ( $c$  1.07,  $\text{CHCl}_3$ ); HRMS-ESI( $m/z$ ) calculated for  $[\text{M}+\text{Na}]^+$ : 573.2852, found 573.2827.

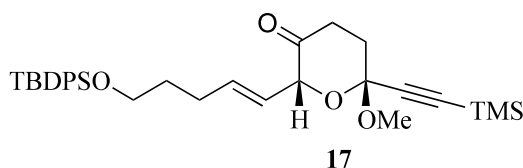

**(2*R*,6*R*)-2-((*E*)-5-((*tert*-Butyldiphenylsilyl)oxy)pent-1-en-1-yl)-6-methoxy-6-((trimethylsilyl)ethynyl)dihydro-2*H*-pyran-3(4*H*)-one (17).**

To a stirred solution of **16a** (410 mg, 0.75 mmol) in  $\text{CH}_2\text{Cl}_2$  (6 mL) and DMSO (2 mL) at 0 °C were sequentially added *i*-Pr<sub>2</sub>NEt (0.77 mL, 4.5 mmol) and  $\text{SO}_3 \cdot \text{Py}$  (510 mg, 3.2 mmol). After 10 min at 0 °C, an aqueous 1 M solution of HCl (3 mL) was added. The organic phase was separated and neutralized with pH 7 aqueous buffer. The separated aqueous phase was extracted with  $\text{CH}_2\text{Cl}_2$  (3 x 10 mL). The combined organic phase was washed with brine, dried over anhydrous  $\text{Na}_2\text{SO}_4$ , filtered and concentrated. The residue was purified by flash chromatography (hexanes-ethyl acetate, 15:1, v/v) to provide **17** (400 mg, 0.72 mmol, 96%) as a colorless oil:  $R_f = 0.72$  (hexanes-ethyl acetate, 5:1, v/v);  $^1\text{H}$  NMR ( $\text{CDCl}_3$ , 500 MHz):  $\delta$  7.69 (dd,  $J = 7.7$  Hz, 1.4 Hz, 4H), 7.42 (m, 6H), 5.78 (dt,  $J = 12.3$  Hz, 5.3 Hz, 1H), 5.56 (dd,  $J = 12.4$  Hz, 5.4 Hz, 1H), 4.44 (d,  $J = 6.9$  Hz, 1H), 3.69 (t,  $J = 6.3$  Hz, 2H), 3.49 (s, 3H), 2.59 (m, 3H), 2.31 (m, 1H), 2.23 (q,  $J = 5.6$  Hz, 2H), 1.71 (m, 2H), 1.07 (s, 9H), 0.23 (s, 9H);  $^{13}\text{C}$  NMR ( $\text{CDCl}_3$ , 125 MHz):  $\delta$  207.6, 136.7, 135.5, 134.0, 129.5, 127.6, 122.8, 101.0, 94.8, 90.0, 77.1, 63.2, 51.4, 35.6, 33.7, 31.6, 28.8, 26.8, 19.2, -0.3; IR (neat): 3048.1, 2957.1, 2856.7, 1733.7, 1471.8, 1427.7, 1250.9, 1110.8, 1048.2, 932.3, 844.4, 702.5;  $[\alpha]_{\text{D}}^{25} + 10.8$  ( $c$  0.59,  $\text{CHCl}_3$ ); HRMS-ESI( $m/z$ ) calculated for  $[\text{M}+\text{Na}]^+$ : 571.2666, found 571.2670.

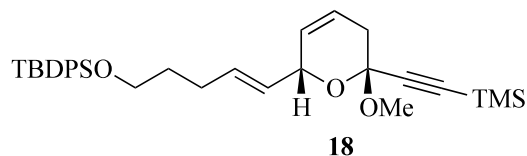

***tert*-Butyl(((*E*)-5-((2*R*,6*R*)-6-methoxy-6-((trimethylsilyl)ethynyl)-5,6-dihydro-2*H*-pyran-2-yl)pent-4-en-1-yl)oxy)diphenylsilane (**18**).**

To a stirred solution of **17** (420 mg, 0.76 mmol) in THF (8 mL) at -78 °C was sequentially added Comins' reagent (450 mg, 1.14 mmol) and KHMDS (2.3 mL, 0.5 M in THF, 1.14 mmol). After 10 min at -78 °C, pH 7 aqueous buffer (8 mL) was added. The separated aqueous phase was extracted with diethyl ether (3 x 15 mL). The combined organic phase was washed with brine, dried over anhydrous Na<sub>2</sub>SO<sub>4</sub>, filtered and concentrated. The residue was purified by flash chromatography (hexanes + 0.3% Et<sub>3</sub>N, v/v) to provide the vinyl triflate (477 mg, 0.70 mmol, 92%) as a pale yellow oil. To a stirred rt solution of the vinyl triflate (477 mg, 0.70 mmol) in THF (7 mL) was added LiCl (294 mg, 7 mmol) and *n*Bu<sub>3</sub>SnH (0.55 mL, 2.1 mmol). To the mixture was slowly added Pd(PPh<sub>3</sub>)<sub>4</sub> (81 mg, 0.07 mmol). After stirring for 10 min at rt, saturated aqueous NaHCO<sub>3</sub> (8 mL) was added. The separated aqueous phase was extracted with diethyl ether (3 x 10 mL). The combined organic phase was washed with brine, dried over Na<sub>2</sub>SO<sub>4</sub>, filtered and concentrated. The residue was purified by flash chromatography (hexanes-ethyl acetate, 200:1, v/v) to provide **18** (289 mg, 0.54 mmol, 77%) as a colorless oil: *R*<sub>f</sub> = 0.58 (hexanes-ethyl acetate, 10:1, v/v); <sup>1</sup>H NMR (CDCl<sub>3</sub>, 400 MHz): δ 7.69 (dd, *J* = 7.7 Hz, 1.5 Hz, 4H), 7.42 (m, 6H), 5.73 (m, 2H), 5.62 (dt, *J* = 10.5 Hz, 1.3 Hz, 1H), 5.48 (dd, *J* = 15.3 Hz, 7.8 Hz, 1H), 4.50 (s-broad, 1H), 3.69 (t, *J* = 6.3 Hz, 2H), 3.52 (s, 3H), 2.72 (m, 1H), 2.34 (m, 1H), 2.18 (q, *J* = 7 Hz, 2H), 1.69 (m, 2H), 1.07 (s, 9H), 0.21 (s, 9H); <sup>13</sup>C NMR (CDCl<sub>3</sub>, 100 MHz): δ 135.6, 134.0, 133.9, 129.5, 128.6, 127.6, 127.5, 120.1, 102.2, 94.0, 89.2, 71.0, 63.3, 51.3, 36.1, 31.7, 28.6, 26.9, 19.2, -0.2; IR (neat): 3042.9, 2956.4, 1659.9, 1471.7, 1250.3, 1182.5, 1110.8, 1016.6, 863.5, 701.9, 613.4; [α]<sub>D</sub><sup>25</sup> + 3.5 (*c* 1.5, CHCl<sub>3</sub>); HRMS-ESI(*m/z*) calculated for [M+Na]<sup>+</sup>: 555.2727, found 555.2726.

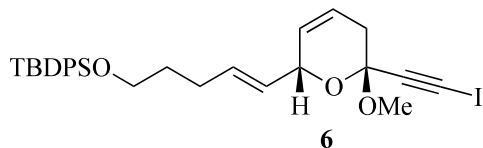

***tert*-Butyl(((*E*)-5-((2*R*,6*R*)-6-(iodoethynyl)-6-methoxy-5,6-dihydro-2*H*-pyran-2-yl)pent-4-en-1-yl)oxy)diphenylsilane (**6**).**

To a stirred solution of **18** (87 mg, 0.16 mmol) in DMF (1.5 mL) at rt was added NIS (47 mg, 0.21 mmol) and AgOTf (36.1 mg, 0.16 mmol). Diethyl ether (3 mL) and saturated aqueous Na<sub>2</sub>S<sub>2</sub>O<sub>3</sub> (3 mL) were added. The aqueous phase was extracted with diethyl ether (3 x 5 mL). The combined organic phases were washed with brine, dried over Na<sub>2</sub>SO<sub>4</sub>, filtered and concentrated. The residue was purified by flash chromatography (hexanes-ethyl acetate, 40:1, v/v) to provide **6** (79 mg, 0.13 mmol, 82%) as a colorless oil: *R*<sub>f</sub> = 0.42 (hexanes-ethyl acetate, 10:1, v/v); <sup>1</sup>H NMR (CDCl<sub>3</sub>, 400 MHz): δ 7.69 (dd, *J* = 7.7 Hz, 1.5 Hz, 4H), 7.42 (m, 6H), 5.73 (m, 2H), 5.62 (dt, *J* = 10.4 Hz, 1.2 Hz, 1H), 5.48 (dd, *J* = 15 Hz, 7.8 Hz, 1H), 4.49 (s-broad, 1H), 3.69 (t, *J* = 6.3 Hz, 2H), 3.52 (s, 3H), 2.72 (m, 1H), 2.39 (m, 1H), 2.18 (q, *J* = 7.2 Hz, 2H), 1.70 (m, 2H), 1.07 (s, 9H); <sup>13</sup>C NMR (CDCl<sub>3</sub>, 100 MHz): δ 135.6, 134.2, 134.0, 129.5, 128.3, 127.6, 127.5, 120.6, 95.0, 92.6, 71.1, 63.2, 51.6, 36.1, 31.7, 28.6, 26.9, 19.2, 3.8; IR (neat): 3069.7, 3042.9, 2930.9, 2855.5, 2180.9, 1660.0, 1588.9, 1470.6, 1427.2, 1232.0, 1182.4, 1110.2, 1016.2, 1036.6, 967.1, 822.9, 702.2, 505.5; [α]<sub>D</sub><sup>25</sup> + 10.4 (*c* 0.85, CHCl<sub>3</sub>); HRMS-ESI(*m/z*) calculated for [M+Na]<sup>+</sup>: 609.1298, found 609.1294.

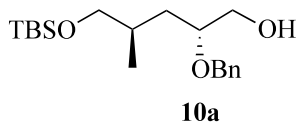

**(2*R*,4*R*)-2-(Benzyloxy)-5-((*tert*-butyldimethylsilyl)oxy)-4-methylpentan-1-ol (**10a**).**

To a stirred solution of diol<sup>2</sup> **10** (92 mg, 0.37 mmol) in CH<sub>2</sub>Cl<sub>2</sub> (2 mL) at rt was added benzaldehyde dimethoxy acetal (0.13 mL, 0.91 mmol) and PPTS (10 mg, 42 μmol). The solution was stirred at rt for 2 h before saturated aqueous NaHCO<sub>3</sub> (2 mL) was added. The organic phase was separated and the aqueous layer was extracted with diethyl ether (3 x 2 mL). The combined organic phase was washed with brine, dried over Na<sub>2</sub>SO<sub>4</sub>, filtered and concentrated. The residue was purified by flash chromatography (hexanes-

ethyl acetate, 20:1 v/v) to give the benzylidene acetal (125 mg, 0.37 mmol, 99%) as a colorless oil. To a stirred solution of the benzylidene acetal (125 mg, 0.370 mmol) in CH<sub>2</sub>Cl<sub>2</sub> (5 mL) at 0 °C was added a solution of DIBAL-H (0.75 mL of 1.0 M solution in PhMe, 0.75 mmol). The solution was warmed to rt over 1 h before a saturated aqueous solution of sodium potassium tartrate (10 mL) and diethyl ether (10 mL) were added. The separated aqueous layer was extracted with diethyl ether (3 x 10 mL). The combined organic phase was washed with brine, dried over Na<sub>2</sub>SO<sub>4</sub>, filtered and concentrated. The residue was purified by flash chromatography (hexanes-ethyl acetate, 7:1, v/v) to give alcohol **10a** (88 mg, 0.26 mmol, 70%) as a colorless oil: *R*<sub>f</sub> = 0.33 (hexanes-ethyl acetate, 4:1, v/v); <sup>1</sup>H NMR (CDCl<sub>3</sub>, 400 MHz): δ 7.30-7.38 (m, 5H), 4.63 (q<sub>AB</sub>, Δ*v* = 11.4 Hz, *J*<sub>AB</sub> = 11.3 Hz, 2H), 3.76 (ddd, *J* = 8.0 Hz, 6.8 Hz, 3.2 Hz, 1H), 3.68 (m, 1H), 3.56 (dt, *J* = 11.2 Hz, 5.6 Hz, 1H), 3.46 (d, *J* = 5.6 Hz, 2H), 1.97 (t, *J* = 6.0 Hz, 1H), 1.82 (m, 2H), 1.26 (ddd, *J* = 15.6 Hz, 10.0 Hz, 5.6 Hz, 1H), 0.91-0.93 (m, 13H), 0.06 (s, 6H); <sup>13</sup>C NMR (CDCl<sub>3</sub>, 100 MHz): δ 138.5, 128.5, 127.8, 127.7, 77.9, 71.4, 68.4, 64.6, 34.9, 32.3, 25.9, 18.3, 17.2, -5.4; IR (neat): 3420, 2928, 2856, 1255, 1096 cm<sup>-1</sup>; [α]<sub>D</sub><sup>25</sup> - 6.2 (c 1.02, CHCl<sub>3</sub>); HRMS-ESI (*m/z*) calculated for [M+ Na<sup>+</sup>]: 361.2175, found: 361.2169.

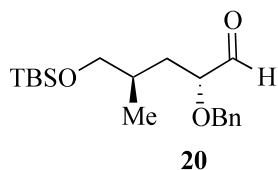

**(2R,4R)-2-(Benzyloxy)-5-((tert-butyldimethylsilyl)oxy)-4-methylpentanal (20).**

To a stirred solution of alcohol **10a** (75 mg, 0.22 mmol) in CH<sub>2</sub>Cl<sub>2</sub> (3 mL) and DMSO (1 mL) at 0 °C were added *i*Pr<sub>2</sub>NEt (233 μL, 1.34 mmol) and SO<sub>3</sub>Py (142 mg, 892 μmol). The solution was stirred at 0 °C for 5 min before a 0 °C 1 M aqueous solution of HCl (5 mL) was added. The organic phase was separated and the aqueous layer was extracted with CH<sub>2</sub>Cl<sub>2</sub> (2 x 5 mL). The combined organic phase was washed with pH 7 buffer solution, dried over Na<sub>2</sub>SO<sub>4</sub>, filtered and concentrated. The residue was purified by flash chromatography (hexanes-ethyl acetate, 12:1, v/v) to give aldehyde **20** (74 mg, 0.22 mmol, 99%) as a colorless oil.

$R_f = 0.43$  (hexanes-ethyl acetate, 10:1, v/v);  $^1\text{H}$  NMR ( $\text{CDCl}_3$ , 400 MHz):  $\delta$  9.68 (d,  $J = 2.0$  Hz, 1H), 7.32-7.38 (m, 5H), 4.72 ( $q_{AB}$ ,  $\Delta\nu = 83$  Hz,  $J_{AB} = 11.3$  Hz, 2H), 3.89 (ddd,  $J = 9.2$  Hz, 4.4 Hz, 2.0 Hz, 1H), 3.47 (d,  $J = 6.0$  Hz, 2H), 1.92 (m, 1H), 1.83 (ddd,  $J = 14.0$ , 9.6, 4.8 Hz, 1H), 1.41 (ddd,  $J = 14.0$ , 8.8, 4.0 Hz, 1H), 0.91 (s, 9H), 0.87 (d,  $J = 6.8$  Hz, 1H), 0.05 (s, 6H);  $^{13}\text{C}$  NMR ( $\text{CDCl}_3$ , 100 MHz):  $\delta$  203.9, 137.4, 128.5, 128.1, 81.7, 72.6, 68.2, 33.4, 31.8, 25.9, 18.3, 16.2, -5.4; IR (neat): 2954, 2928, 1733, 1059  $\text{cm}^{-1}$ ;  $[\alpha]_D^{25} - 56.8$  (c 1.05,  $\text{CHCl}_3$ ); HRMS-ESI ( $m/z$ ) calculated for  $[\text{M}+\text{MeOH}+\text{Na}^+]$ : 391.2281, found: 391.2278.

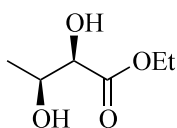

**21**

**(2R,3S)-Ethyl 2,3-dihydroxybutanoate (21).**

To a stirred suspension of AD-mix- $\alpha$  (24 g) in  $\text{H}_2\text{O}$  (80 mL) and  $t$ -BuOH (80 mL) at rt were added methyl sulfonamide (1.66 g, 17.5 mmol) and ethyl (2*E*)-butenoate (**9**, 2.00 g, 17.5 mmol). After stirring for 12 h, a saturated aqueous solution of  $\text{Na}_2\text{SO}_3$  (50 mL) and diethyl ether (100 mL) were added. The separated aqueous phase was extracted with diethyl ether (3 x 50 mL). The combined organic phase was washed with brine, dried over  $\text{Na}_2\text{SO}_4$ , filtered and concentrated. The residue was purified by flash chromatography (hexanes-ethyl acetate, 2:1, v/v) to give diol **21** (1.86 g, 11.4 mmol, 65%) as a colorless oil:  $R_f = 0.79$  (hexanes-ethyl acetate, 1:1, v/v);  $^1\text{H}$  NMR ( $\text{CDCl}_3$ , 400 MHz):  $\delta$  4.30 (q,  $J = 3.2$  Hz, 2H), 4.10 (m, 1H), 4.03 (dd,  $J = 5.6$  Hz, 2.8 Hz, 1H), 3.14 (d,  $J = 9.6$  Hz, 1H), 2.17 (d,  $J = 8.4$  Hz, 1H), 1.33-1.34 (m, 6H);  $^{13}\text{C}$  NMR ( $\text{CDCl}_3$ , 100 MHz):  $\delta$  173.4, 74.3, 68.7, 62.1, 19.7, 14.1; IR (neat): 3417, 2980, 1735, 1144  $\text{cm}^{-1}$ ;  $[\alpha]_D^{25} + 11$  (c 1.8,  $\text{CHCl}_3$ );<sup>3</sup> HRMS-ESI ( $m/z$ ) calculated for  $[\text{M}+\text{Na}^+]$ : 171.0633, found: 171.0630.

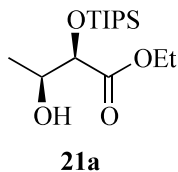

**(2R,3S)-Ethyl 3-hydroxy-2-((triisopropylsilyl)oxy)butanoate (21a).**

To a stirred rt solution of **21** (1.86 g, 11.4 mmol) in DMF (20 mL) at rt was added imidazole (1.11 g, 16.3 mmol), TIPSCl (3.22 mL, 15.0 mmol) and DMAP (0.15 g, 1.3 mmol). After stirring for 12 h, diethyl ether (100 mL) and water were added. The separated aqueous layer was extracted with diethyl ether (3 x 50 mL). The combined organic phase was washed with brine, dried over Na<sub>2</sub>SO<sub>4</sub>, filtered and concentrated. The residue was purified by flash chromatography (hexanes-ethyl acetate, 4:1, v/v) to give ester **21a** (1.7 g, 5.6 mmol, 44%) as a colorless oil: *R*<sub>f</sub> = 0.61 (hexanes-ethyl acetate, 1:1, v/v); <sup>1</sup>H NMR (CDCl<sub>3</sub>, 400 MHz): δ 4.21-4.26 (m, 3H), 3.96 (m, 1H), 2.53 (d, *J* = 7.2 Hz, 1H), 1.32 (t, *J* = 7.2 Hz, 3H), 1.25 (d, *J* = 6.0 Hz, 3H), 1.08-1.17 (m, 21H); <sup>13</sup>C NMR (CDCl<sub>3</sub>, 100 MHz): δ 172.2, 76.7, 69.9, 61.0, 18.9, 17.9, 14.2, 12.4; IR (neat): 3495, 2943, 2867, 1751, 1151 cm<sup>-1</sup>; [α]<sub>D</sub><sup>25</sup> + 22.2 (c 1.20, CHCl<sub>3</sub>); HRMS-ESI (*m/z*) calculated for [M+Na<sup>+</sup>]: 327.1968, found: 327.1973.

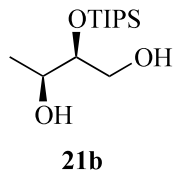

**(2S,3S)-2-((Triisopropylsilyl)oxy)butane-1,3-diol (21b).**

To a stirred solution of **21a** (1.70 g, 5.59 mmol) in CH<sub>2</sub>Cl<sub>2</sub> (40 mL) at 0 °C was added DIBAL (24.9 mL of 1.0 M solution in toluene, 24.9 mmol). The solution was warmed to rt over 30 min and saturated sodium potassium tartrate solution (30 mL) was added. The resulting mixture was diluted with diethyl ether (100 mL) and the separated aqueous layer was extracted with diethyl ether (3 x 50 mL). The combined organic phase was washed with brine, dried over Na<sub>2</sub>SO<sub>4</sub>, filtered and concentrated. The residue was purified by flash chromatography (hexanes-ethyl acetate, 3:1, v/v) to give diol **21b** (1.28 g, 4.86 mmol, 87%) as a colorless oil: *R*<sub>f</sub> = 0.46 (hexanes-ethyl acetate, 2:1, v/v); <sup>1</sup>H NMR (CDCl<sub>3</sub>, 400 MHz): δ 3.94 (dq, *J* = 10.8 Hz, 6.4 Hz, 1H), 3.75-3.81 (m, 2H), 3.71

(m, 1H), 2.32 (d,  $J$  = 5.6 Hz, 1H), 2.10 (m, 1H), 1.26 (d,  $J$  = 6.4 Hz, 3H) 1.09-1.17 (m, 21H);  $^{13}\text{C}$  NMR ( $\text{CDCl}_3$ , 100 MHz):  $\delta$  76.0, 68.8, 64.1, 19.1, 18.1, 12.6; IR (neat): 3368, 2942, 2866, 1462, 1086  $\text{cm}^{-1}$ ;  $[\alpha]_{\text{D}}^{25}$  + 8.3 (c 1.30,  $\text{CHCl}_3$ ); HRMS-ESI ( $m/z$ ) calculated for  $[\text{M}+\text{Na}^+]$ : 285.1862, found: 285.1861.

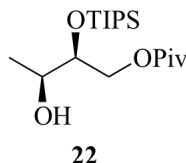

**(2S,3S)-3-Hydroxy-2-((triisopropylsilyl)oxy)butyl pivalate (22).**

To a stirred solution of **21b** (0.72 g, 2.8 mmol) in  $\text{CH}_2\text{Cl}_2$  (20 mL) at rt was added pyridine (0.44 mL, 5.4 mmol), pivaloyl chloride (0.34 mL, 2.8 mmol) and DMAP (33 mg, 0.27 mmol). The solution was stirred at rt for 12 h then a saturated aqueous solution of  $\text{NaHCO}_3$  (20 mL) was added. The resulting mixture was diluted with diethyl ether (100 mL) and the separated aqueous layer was extracted with diethyl ether (3 x 20 mL). The combined organic phase was washed with brine, dried over  $\text{Na}_2\text{SO}_4$ , filtered and concentrated. The residue was purified by flash chromatography (hexanes-ethyl acetate, 20:1, v/v) to give alcohol **22** (1.28 g, 3.69 mmol, 77%) as a colorless oil:  $R_f$  = 0.60 (hexanes-ethyl acetate, 4:1, v/v);  $^1\text{H}$  NMR ( $\text{CDCl}_3$ , 400 MHz):  $\delta$  4.19 (dd,  $J$  = 10.6 Hz, 3.6 Hz, 1H), 4.12 (dd,  $J$  = 10.6 Hz, 6.0 Hz, 1H), 3.82-3.85 (m, 2H), 2.28 (d,  $J$  = 6.0 Hz, 1H), 1.24 (d,  $J$  = 6.4 Hz, 3H), 1.22 (s, 9H), 1.10-1.14 (m, 21H);  $^{13}\text{C}$  NMR ( $\text{CDCl}_3$ , 100 MHz):  $\delta$  178.3, 74.5, 68.1, 65.0, 38.8, 27.2, 19.3, 18.1, 18.0, 12.6; IR (neat): 3486, 2944, 2867, 1731, 1161  $\text{cm}^{-1}$ ;  $[\alpha]_{\text{D}}^{25}$  + 12.1 (c 1.35,  $\text{CHCl}_3$ ); HRMS-ESI ( $m/z$ ) calculated for  $[\text{M}+\text{Na}^+]$ : 369.2437, found: 369.2431.

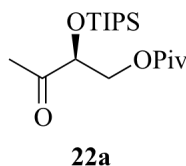

**(S)-3-Oxo-2-((triisopropylsilyl)oxy)butyl pivalate (22a).**

To a stirred solution of **22** (1.05 g, 3.03 mmol) in  $\text{CH}_2\text{Cl}_2$  (15 mL) and DMSO (8 mL) at 0 °C was added  $i\text{Pr}_2\text{NEt}$  (3.16 mL, 18.2 mmol), and  $\text{SO}_3\cdot\text{Py}$  (1.92 g, 12.6 mmol). The

solution was stirred at 0 °C for 20 min before a cold 1 M HCl solution (30 mL) was added. The organic phase was separated and the aqueous layer was extracted with CH<sub>2</sub>Cl<sub>2</sub> (2 x 20 mL). The combined organic phase was washed with pH 7 aqueous buffer then brine, dried over Na<sub>2</sub>SO<sub>4</sub>, filtered and concentrated. The residue was purified by flash chromatography (hexanes-ethyl acetate, 40:1, v/v) to give ketone **22a** (0.98 g, 2.9 mmol, 94%) as a colorless oil: *R*<sub>f</sub> = 0.71 (hexanes-ethyl acetate, 4:1, v/v); <sup>1</sup>H NMR (CDCl<sub>3</sub>, 400 MHz): δ 4.30-4.33 (m, 2H), 4.22 (dd, *J* = 10.6 Hz, 6.0 Hz, 1H), 2.30 (s, 3H), 1.20 (s, 9H), 1.08-1.15 (m, 21H); <sup>13</sup>C NMR (CDCl<sub>3</sub>, 100 MHz): δ 210.3, 178.0, 76.9, 68.3, 66.4, 38.7, 27.1, 26.1, 19.3, 18.0, 17.9, 12.2; IR (neat): 2944, 2867, 1735, 1143 cm<sup>-1</sup>; [α]<sub>D</sub><sup>25</sup> - 5.9 (c 1.01, CHCl<sub>3</sub>); HRMS-ESI (*m/z*) calculated for [M+Na<sup>+</sup>]: 367.2281, found: 367.2282.

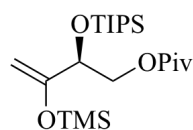

**23**

**(S)-2-((Triisopropylsilyl)oxy)-3-((trimethylsilyl)oxy)but-3-en-1-yl pivalate (23).**

To a stirred solution of **22a** (0.98 g, 2.85 mmol) in CH<sub>2</sub>Cl<sub>2</sub> (20 mL) at rt was sequentially added Et<sub>3</sub>N (1.2 mL, 8.61 mmol) and TMSOTf (1.04 mL, 5.75 mmol). The solution was stirred at rt for 30 min before saturated aqueous NaHCO<sub>3</sub> (10 mL) was added. The organic phase was separated and washed with saturated NH<sub>4</sub>Cl solution (10 mL), pH 7 aqueous buffer (10 mL), and brine (10 mL), then dried over Na<sub>2</sub>SO<sub>4</sub>, filtered and concentrated. The residue was dissolved in benzene and concentrated to give enol ether **23** (1.17g, 2.85 mmol, 99%) as a yellow oil, which was used without further purification.

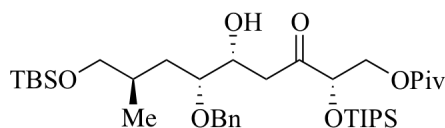

**24**

**(2S,5R,6R,8R)-6-(Benzyloxy)-9-((tert-butyldimethylsilyl)oxy)-5-hydroxy-8-methyl-3-oxo-2-((triisopropylsilyl)oxy)nonyl pivalate (24).**

To a stirred solution of aldehyde **20** (58 mg, 0.17 mmol) in CH<sub>2</sub>Cl<sub>2</sub> (3 mL) at -78 °C was added SnCl<sub>4</sub> (0.1 mL, 0.9 mmol), the solution was stirred at -78 °C for 10 min before a



solution of enol ether **23** (218 mg, 524  $\mu$ mol) in  $\text{CH}_2\text{Cl}_2$  (2 mL) was added via cannula. The solution was stirred at  $-78^\circ\text{C}$  for 25 min before saturated aqueous  $\text{NaHCO}_3$  (10 mL) was added. The mixture was diluted with diethyl ether and warmed to rt. The organic phase was separated and the aqueous layer was extracted with diethyl ether (2 x 10 mL). The combined organic phase was washed with brine, dried over  $\text{Na}_2\text{SO}_4$ , filtered and concentrated. The residue was purified by flash chromatography (hexanes-ethyl acetate, 7: 1, v/v) to give ketone **24** (90 mg, 0.13 mmol, 76%) as a colorless oil:  $R_f = 0.25$  (hexanes-ethyl acetate, 10:1, v/v);  $^1\text{H}$  NMR ( $\text{CDCl}_3$ , 400 MHz):  $\delta$  7.30-7.35 (m, 5H), 4.60 (s, 2H), 4.36 (dd,  $J = 4.8$  Hz, 3.2 Hz, 1H), 4.28-4.32 (m, 2H), 4.24 (dd, d,  $J = 10.8$  Hz, 3.2 Hz, 1H), 3.59 (dt,  $J = 8.8$  Hz, 3.6 Hz, 1H), 3.48 (dd,  $J = 9.6$  Hz, 5.6 Hz, 1H), 3.44 (dd,  $J = 9.6$  Hz, 6.0 Hz, 1H), 3.00 (dd,  $J = 18.4$  Hz, 2.4 Hz, 1H), 2.90 (dd,  $J = 18.4$  Hz, 9.2 Hz, 1H), 2.80 (d,  $J = 4.4$  Hz, 1H), 1.86 (sextet,  $J = 6.8$  Hz, 1H), 1.68 (ddd,  $J = 18.0$  Hz, 8.4 Hz, 6.4 Hz, 1H), 1.39 (ddd,  $J = 18.0$  Hz, 8.4 Hz, 4.8 Hz, 1H), 1.19 (s, 9H), 1.05-1.10 (m, 21H) 0.90-0.91 (m, 12H), 0.05 (s, 6H);  $^{13}\text{C}$  NMR ( $\text{CDCl}_3$ , 100 MHz):  $\delta$  212.5, 178.2, 138.5, 128.3, 127.7, 127.6, 78.7, 72.1, 68.6, 67.8, 66.0, 41.2, 38.8, 33.4, 32.4, 27.1, 26.0, 18.4, 17.9, 16.8, 12.2, -5.3, -5.4; IR (neat): 3527, 2955, 1731, 1462, 1143  $\text{cm}^{-1}$ ;  $[\alpha]_D^{25} + 13.2$  (c 0.95,  $\text{CHCl}_3$ ); HRMS-ESI ( $m/z$ ) calculated for  $[\text{M}+\text{Na}^+]$ : 703.4401, found: 703.4402.

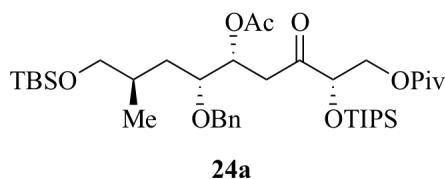

**(2S,5R,6R,8R)-5-Acetoxy-6-(benzyloxy)-9-((tert-butyldimethylsilyl)oxy)-8-methyl-3-oxo-2-(((triisopropylsilyl)oxy)nonyl pivalate (24a).**

To a stirred solution of ketone **24** (90 mg, 0.13 mmol) in  $\text{CH}_2\text{Cl}_2$  (5 mL) at rt was added sequentially pyridine (54  $\mu$ L, 0.67 mmol), DMAP (3.2 mg, 26  $\mu$ mol) and acetyl chloride (38  $\mu$ L, 0.53 mmol). The solution was stirred at rt for 5 min before saturated aqueous  $\text{NaHCO}_3$  (5 mL) was added. The resulting mixture was diluted with diethyl ether (10 mL) and the separated aqueous layer was extracted with diethyl ether (3 x 5 mL). The combined organic phase was washed with brine, dried over  $\text{Na}_2\text{SO}_4$ , filtered and

concentrated. The residue was purified by flash chromatography (hexanes-ethyl acetate, 20:1, v/v) to give ketone **24a** (90 mg, 0.13 mmol, 94%) as a colorless oil:  $R_f$  = 0.33 (hexanes-ethyl acetate, 10:1, v/v);  $^1\text{H}$  NMR ( $\text{CDCl}_3$ , 400 MHz):  $\delta$  7.30-7.34 (m, 5H), 5.64 (ddd,  $J$  = 9.2 Hz, 6.4 Hz, 4.8 Hz, 1H), 4.66 (q<sub>AB</sub>,  $\Delta\nu$  = 37 Hz,  $J_{AB}$  = 11.2 Hz, 2H), 4.36 (dd,  $J$  = 4.8 Hz, 3.6 Hz, 1H), 4.29 (dd,  $J$  = 11.2 Hz, 4.8 Hz, 1H), 4.23 (dd,  $J$  = 11.2 Hz, 3.6 Hz, 1H), 3.75 (dt,  $J$  = 10.0 Hz, 3.6 Hz, 1H), 3.45 (dd,  $J$  = 10.0 Hz, 6.0 Hz, 1H), 3.41 (dd,  $J$  = 10.0 Hz, 6.0 Hz, 1H), 3.08 (m, 2H), 2.01 (s, 3H), 1.78 (m, 1H), 1.61 (ddd,  $J$  = 14.0 Hz, 10.0 Hz, 6.4 Hz, 1H), 1.20 (s, 9H), 1.05-1.11 (m, 21H) 0.91 (s, 9H), 0.78 (d,  $J$  = 6.4 Hz, 3H), 0.05 (s, 6H);  $^{13}\text{C}$  NMR ( $\text{CDCl}_3$ , 100 MHz):  $\delta$  208.9, 178.0, 170.0, 138.3, 128.3, 127.8, 127.6, 76.8, 75.3, 71.9, 68.6, 68.4, 66.1, 38.8, 37.7, 33.2, 32.2, 27.1, 26.0, 21.0, 18.3, 17.9, 16.4, 12.2, -5.4; IR (neat): 2954, 1738, 1462, 1238, 1142  $\text{cm}^{-1}$ ;  $[\alpha]_D^{25}$  + 10.1 (c 1.00,  $\text{CHCl}_3$ ); HRMS-ESI ( $m/z$ ) calculated for  $[\text{M}+\text{Na}^+]$ : 745.4507, found: 745.4513.

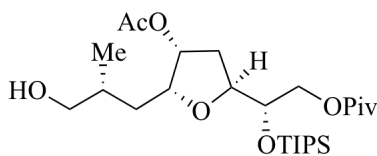

**25a**

**(S)-2-((2S,4R,5R)-4-Acetoxy-5-((R)-3-hydroxy-2-methylpropyl)tetrahydrofuran-2-yl)-2-((triisopropylsilyl)oxy)ethyl pivalate (25a).**

To a stirred solution of ketone **24a** (90 mg, 0.13 mmol) in ethyl acetate (5 mL) at rt was added  $\text{Pd}(\text{OH})_2$  on carbon (44 mg, 20%, 62  $\mu\text{mol}$ ). The resulting suspension was degassed and flushed with  $\text{H}_2$  three times. The suspension was then stirred at rt for 15 min, filtered through celite and washed with ethyl acetate. The combined organic phase was concentrated and purified by flash chromatography (hexanes-ethyl acetate, 10:1, v/v) to give alcohol **25** (79 mg, 0.013 mmol, 99%) as a colorless oil. This was dissolved in  $\text{CH}_2\text{Cl}_2$  (5 mL) and cooled to  $-78^\circ\text{C}$ . To the stirred solution were sequentially added  $\text{Et}_3\text{SiH}$  (0.15 mL, 1.2 mmol) and  $\text{SnCl}_4$  (29 mL, 0.25 mmol). The solution was warmed to  $-30^\circ\text{C}$  over 1 h with stirring. Saturated aqueous  $\text{NaHCO}_3$  (10 mL) was added. The resulting mixture was warmed to rt, diluted with diethyl ether (10 mL) and the separated aqueous layer was extracted with diethyl ether (3 x 5 mL). The combined organic phase

was washed with brine, dried over Na<sub>2</sub>SO<sub>4</sub>, filtered and concentrated. The residue was purified by flash chromatography (hexanes-ethyl acetate, 7:1, v/v) to give alcohol **25a** (38 mg, 77 μmol, 60%) as a colorless oil: *R*<sub>f</sub> = 0.53 (hexanes-ethyl acetate, 2:1, v/v); <sup>1</sup>H NMR (CDCl<sub>3</sub>, 400 MHz): δ 5.35 (t, *J* = 4.0 Hz, 1H), 4.34 (ddd, *J* = 9.2 Hz, 6.8 Hz, 3.2 Hz, 1H), 4.23 (dd, *J* = 10.8 Hz, 6.0 Hz, 1H), 4.12-4.18 (m, 2H), 3.96 (m, 1H), 3.58 (m, 1H), 3.46 (m, 1H), 2.54 (m, 1H), 2.36 (ddd, *J* = 17.6 Hz, 9.2 Hz, 5.2 Hz, 1H), 2.12 (s, 3H), 2.03 (dd, *J* = 14.0 Hz, 6.8 Hz, 1H), 1.81 (octet, *J* = 6.4 Hz, 1H), 1.61 (ddd, *J* = 14.4 Hz, 10.0 Hz, 8.0 Hz, 1H), 1.43 (ddd, *J* = 14.4 Hz, 6.4 Hz, 2.0 Hz, 1H), 1.22 (s, 9H), 1.06-1.12 (m, 21H), 0.95 (d, *J* = 6.8 Hz, 3H); <sup>13</sup>C NMR (CDCl<sub>3</sub>, 100 MHz): δ 178.3, 170.6, 80.7, 77.8, 76.3, 72.2, 68.2, 65.4, 38.8, 34.5, 34.3, 34.0, 27.2, 21.1, 18.1, 17.8, 12.7; IR (neat): 3460, 2945, 2867, 1732, 1241, 1137 cm<sup>-1</sup>; [α]<sub>D</sub><sup>25</sup> + 10.0 (c 0.84, CHCl<sub>3</sub>); HRMS-ESI (*m/z*) calculated for [M+Na<sup>+</sup>]: 525.3224, found: 525.3220.

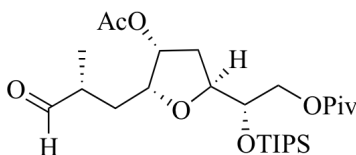

7

**(S)-2-((2S,4R,5R)-4-Acetoxy-5-((R)-2-methyl-3-oxopropyl)tetrahydrofuran-2-yl)-2-((triisopropylsilyl)oxy)ethyl pivalate (7).**

To a stirred solution of alcohol **25a** (38 mg, 77 μmol) in CH<sub>2</sub>Cl<sub>2</sub> (2 mL) and DMSO (1 mL) at 0 °C was sequentially added *i*Pr<sub>2</sub>NEt (0.10 mL, 0.58 mmol) and SO<sub>3</sub>Py (48 mg, 0.30 mmol). The solution was stirred at 0 °C for 5 min before a 0 °C aqueous solution of HCl (1 M, 3 mL) was added. The organic phase was separated and the aqueous layer was extracted with CH<sub>2</sub>Cl<sub>2</sub> (2 x 3 mL). The combined organic phases were washed with pH = 7 aqueous buffer, dried over Na<sub>2</sub>SO<sub>4</sub>, filtered and concentrated. The residue was purified by flash chromatography (hexanes-ethyl acetate, 10:1, v/v) to give aldehyde **7** (38 mg, 76 μmol, 99%) as a colorless oil: *R*<sub>f</sub> = 0.43 (hexanes-ethyl acetate, 4:1, v/v); <sup>1</sup>H NMR (CDCl<sub>3</sub>, 400 MHz): δ 9.67 (d, 1.6 Hz, 1H), 5.34 (t, *J* = 4.0 Hz, 1H), 4.34 (ddd, *J* = 10.8 Hz, 6.8 Hz, 4.0 Hz, 1H), 4.17 (d, *J* = 5.2 Hz, 2H), 4.12 (dt, *J* = 10.0 Hz, 3.6 Hz, 1H), 3.94 (q, *J* = 4.8 Hz, 1H), 2.59 (sextet, *J* = 6.8 Hz, 1H), 2.33 (ddd, *J* = 14.0 Hz, 8.8 Hz, 4.2 Hz, 1H), 2.12 (s, 3H), 2.02-2.09 (m, 2H), 1.40 (ddd, *J* = 14.0 Hz, 8.0 Hz, 3.2 Hz, 1H), 1.22 (s,

9H), 0.95 (d,  $J = 6.8$  Hz, 3H), 1.08-1.09 (m, 21H);  $^{13}\text{C}$  NMR ( $\text{CDCl}_3$ , 100 MHz)  $\delta$  204.4, 178.3, 170.5, 78.8, 77.8, 75.7, 72.6, 65.5, 43.9, 38.8, 34.5, 30.2, 27.2, 21.0, 18.1, 13.2, 12.7; IR (neat): 2944, 2867, 2714, 1731, 1237, 1139  $\text{cm}^{-1}$ ;  $[\alpha]_{\text{D}}^{25} + 4.0$  (c 1.01,  $\text{CHCl}_3$ ); HRMS-ESI ( $m/z$ ) calculated for  $[\text{M}+\text{Na}^+]$ : 523.3067, found: 523.3068.

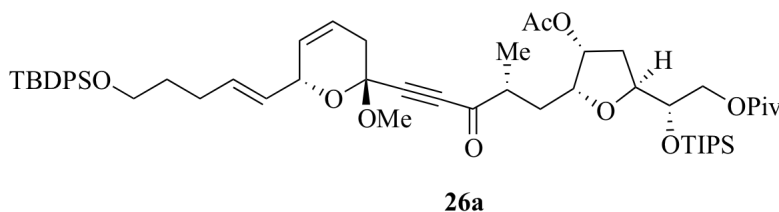

**(S)-2-((2S,4R,5R)-4-Acetoxy-5-((R)-5-((2R,6R)-6-((E)-5-((tert-butyl)diphenylsilyl)oxy)pent-1-en-1-yl)-2-methoxy-3,6-dihydro-2H-pyran-2-yl)-2-methyl-3-oxopent-4-yn-1-yl)tetrahydrofuran-2-yl)-2-((triisopropylsilyl)oxy)ethyl pivalate (26a).**

To a mixture of  $\text{CrCl}_2$  (42 mg, 0.34 mmol) and  $\text{NiCl}_2$  (0.2 mg, 1.5  $\mu\text{mol}$ ) at rt was added a solution of aldehyde **7** (38 mg, 76  $\mu\text{mol}$ ) and iodide **6** (35 mg, 60  $\mu\text{mol}$ ) in THF (3 mL) via cannula. The suspension was stirred at rt for 12 h before diethyl ether (10 mL) and an aqueous solution of 1 M serine saturated with  $\text{NaHCO}_3$  (10 mL) were added. The resulting mixture was stirred at rt for 1 h. The organic phase was separated and the aqueous layer was extracted with diethyl ether (3 x 5 mL). The combined organic phase was washed with brine, dried over  $\text{Na}_2\text{SO}_4$ , filtered and concentrated. The residue was purified by flash chromatography (hexanes-ethyl acetate, 5:1, v/v) to give alcohol **26** (45 mg, 47  $\mu\text{mol}$ , 78%) as a colorless oil. This was dissolved in  $\text{CH}_2\text{Cl}_2$  (2 mL) and DMSO (1 mL) at rt, and  $i\text{Pr}_2\text{NEt}$  (0.10 mL, 0.58 mmol) and  $\text{SO}_3\cdot\text{Py}$  (48 mg, 0.30 mmol) were added sequentially. The solution was stirred at rt for 5 min before a saturated aqueous solution of  $\text{NH}_4\text{Cl}$  (3 mL) was added. The organic phase was separated and the aqueous layer was extracted with  $\text{CH}_2\text{Cl}_2$  (3 x 3 mL). The combined organic phase was washed with brine, dried over  $\text{Na}_2\text{SO}_4$ , filtered and concentrated. The residue was purified by flash chromatography (hexanes-ethyl acetate, 8:1, v/v) to give **26a** (35 mg, 36  $\mu\text{mol}$ , 77%) as a colorless oil:  $R_f = 0.64$  (hexanes-ethyl acetate, 4:1, v/v);  $^1\text{H}$  NMR ( $\text{CDCl}_3$ , 400 MHz):  $\delta$  7.68 (dd,  $J = 8.0$  Hz, 1.6 Hz, 4H), 7.38-7.46 (m, 6H), 5.70-5.80 (m, 2H), 5.63 (d,  $J = 10.4$  Hz, 1H), 5.47 (dd,  $J = 15.2$  Hz, 7.6 Hz, 1H), 5.34 (t,  $J = 3.6$  Hz, 1H), 4.52 (m,

1H), 4.26 (ddd,  $J = 11.2$  Hz,  $7.2$  Hz,  $4.4$  Hz, 1H), 4.17 (d,  $J = 5.2$  Hz, 2H), 4.08 (dt,  $J = 6.4$  Hz,  $3.6$  Hz, 1H), 3.95 (q,  $J = 4.8$  Hz, 1H), 3.69 (t,  $J = 6.0$  Hz, 2H), 3.54 (s, 3H), 2.83 (sextet,  $J = 6.8$  Hz, 1H), 2.71 (dq,  $J = 14.0$  Hz,  $2.0$  Hz, 1H), 2.43 (dt,  $J = 14.0$  Hz,  $3.2$  Hz, 1H), 2.32 (ddd,  $J = 12.8$  Hz,  $9.2$  Hz,  $4.2$  Hz, 1H), 2.13-2.22 (m, 3H), 2.11 (s, 3H), 2.06 (dd,  $J = 13.2$  Hz,  $8.0$  Hz, 1H), 1.69 (m, 2H), 1.47 (ddd,  $J = 14.0$  Hz,  $8.8$ ,  $4.4$  Hz, 1H), 1.22-1.24 (m, 12H), 1.09-1.12 (m, 21H), 1.07 (s, 9H);  $^{13}\text{C}$  NMR ( $\text{CDCl}_3$ , 100 MHz):  $\delta$  190.4, 178.3, 170.4, 135.6, 134.2, 134.0, 129.5, 128.1, 127.6, 120.3, 94.3, 88.2, 80.9, 78.3, 77.8, 75.6, 72.6, 71.0, 65.5, 63.2, 51.8, 45.4, 38.8, 35.6, 34.5, 31.8, 31.3, 28.6, 27.2, 26.9, 21.0, 19.2, 18.1, 15.3, 12.7; IR (neat): 2939, 2865, 2218, 1738, 1681, 1236, 1137, 1112  $\text{cm}^{-1}$ ;  $[\alpha]_{\text{D}}^{25} + 9.4$  (c 0.67,  $\text{CHCl}_3$ ); HRMS-ESI ( $m/z$ ) calculated for  $[\text{M}+\text{Na}^+]$ : 981.5344, found: 981.5338.

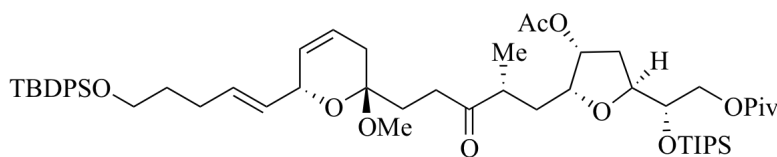

27

**(S)-2-((2S,4R,5R)-4-Acetoxy-5-((R)-5-((2S,6R)-6-((E)-5-((tert-butylidiphenylsilyl)oxy)pent-1-en-1-yl)-2-methoxy-3,6-dihydro-2H-pyran-2-yl)-2-methyl-3-oxopentyl)tetrahydrofuran-2-yl)-2-((triisopropylsilyl)oxy)ethyl pivalate (27).**

To  $[\text{CuH}(\text{PPh}_3)]_6$  (139 mg, 82.2  $\mu\text{mol}$ ) at rt was added a solution of ketone **26a** (52.5 mg, 54.8  $\mu\text{mol}$ ) in degassed benzene (3 mL) via cannula. Degassed  $\text{H}_2\text{O}$  (15 mL) was then added. The suspension was stirred at rt for 12 h before a saturated aqueous  $\text{NaHCO}_3$  (3 mL) was added. It was then diluted with diethyl ether (10 mL) and stirred under air at rt for 30 min. The organic phase was separated and the aqueous layer was extracted with diethyl ether (3 x 3 mL). The combined organic phase was washed with brine, dried over  $\text{Na}_2\text{SO}_4$ , filtered and concentrated. The residue was purified by flash chromatography (hexanes-ethyl acetate, 5:1, v/v) to give ketone **27** (40 mg, 42  $\mu\text{mol}$ , 76%) as a colorless oil:  $R_f = 0.43$  (hexanes-ethyl acetate, 4:1, v/v);  $^1\text{H}$  NMR ( $\text{CDCl}_3$ , 400 MHz):  $\delta$  7.68 (dd,  $J = 7.6$  Hz,  $1.6$  Hz, 4H), 7.37-7.46 (m, 6H), 5.69-5.78 (m, 2H), 5.64 (d,  $J = 10.4$  Hz, 1H),

5.46 (dd,  $J = 15.2$  Hz, 7.2 Hz, 1H), 5.31 (t,  $J = 3.6$  Hz, 1H), 4.49 (m, 1H), 4.25 (ddd,  $J = 8.8$  Hz, 7.8 Hz, 4.4 Hz, 1H), 4.17 (m, 2H), 4.07 (dt,  $J = 10.0$  Hz, 3.4 Hz, 1H), 3.94 (q,  $J = 4.8$  Hz, 1H), 3.69 (t,  $J = 6.4$  Hz, 2H), 3.27 (s, 3H), 2.77 (sextet,  $J = 6.8$  Hz, 1H), 2.61 (ddd,  $J = 17.6$  Hz, 10.0 Hz, 6.0 Hz, 1H), 2.50 (ddd,  $J = 17.6$  Hz, 10.0 Hz, 5.2 Hz, 1H), 2.31 (ddd,  $J = 14.0$  Hz, 8.8 Hz, 5.6 Hz, 1H), 2.16-2.23 (m, 3H), 2.10 (s, 3H), 2.01-2.09 (m, 3H), 1.91-1.99 (m, 2H), 1.69 (m, 2H), 1.41 (ddd,  $J = 14.0$  Hz, 8.4 Hz, 3.2 Hz, 1H), 1.22 (s, 9H), 1.09-1.16 (m, 24H), 1.07 (s, 9H);  $^{13}\text{C}$  NMR ( $\text{CDCl}_3$ , 100 MHz):  $\delta$  213.0, 178.3, 170.5, 135.6, 134.0, 133.0, 129.5, 129.2, 128.0, 127.6, 121.2, 98.7, 78.8, 77.7, 75.7, 72.6, 70.6, 65.5, 63.3, 48.3, 43.2, 38.8, 35.3, 34.4, 32.7, 31.9, 29.6, 28.6, 27.2, 26.7, 21.0, 19.2, 18.1, 16.1, 12.7; IR (neat): 2940, 2865, 1738, 1237, 1112  $\text{cm}^{-1}$ ;  $[\alpha]_{\text{D}}^{25}$  - 3.9 (c 0.36,  $\text{CHCl}_3$ ); HRMS-ESI ( $m/z$ ) calculated for  $[\text{M}+\text{Na}^+]$ : 985.5657, found: 985.5679.

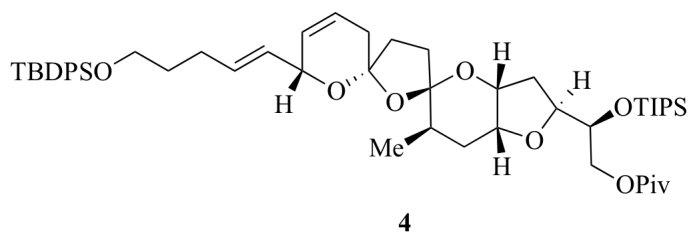

**(2S)-2-[(2R,3R,4aR,5'R,6S,6''R,7aR)-6''-[(1E)-5-[(tert-Butyldiphenylsilyl)oxy]pent-1-en-1-yl]-3-methyl-3'',4,4a,6,6'',7,7a-octahydrodispiro[furo[3,2-b]pyran-2,2'-oxolane-5',2''-pyran]-6-yl]-2-((triisopropylsilyl)oxy)ethyl pivalate (4).**

To a stirred solution of ketone **27** (38 mg, 40  $\mu\text{mol}$ ) in methanol (2 mL) at rt was added  $\text{K}_2\text{CO}_3$  (16 mg, 0.12 mmol). The mixture was stirred at rt for 30 min before diethyl ether (10 mL) and  $\text{H}_2\text{O}$  (3 mL) were added. The organic phase was separated and the aqueous layer was extracted with diethyl ether (3 x 5 mL). The combined organic phase was washed with brine, dried over  $\text{Na}_2\text{SO}_4$ , filtered and concentrated. The residue was purified by flash chromatography (hexanes-ethyl acetate, 3:1, v/v) to give alcohol **5** (36 mg, 39  $\mu\text{mol}$ , 93%) as a colorless oil. This was dissolved in  $\text{CH}_2\text{Cl}_2$  (2 mL) at rt and PPTS (1.8 mg, 7.2  $\mu\text{mol}$ ) was added. The solution was stirred at rt for 30 min before a saturated aqueous solution of  $\text{NaHCO}_3$  (0.5 mL) was added. The mixture was diluted with diethyl ether (5 mL), the organic phase was separated and the aqueous layer was extracted with diethyl ether (3 x 2 mL). The combined organic phases were washed with

brine, dried over Na<sub>2</sub>SO<sub>4</sub>, filtered and concentrated. The residue was purified by flash chromatography (hexanes–ethyl acetate, 20:1, v/v) to give spiroketal **4** (33 mg, 39 μmol, 99%) as a colorless oil: R<sub>f</sub> = 0.42 (hexanes-ethyl acetate, 10:1, v/v); <sup>1</sup>H NMR (CDCl<sub>3</sub>, 400 MHz): δ 7.68 (d, *J* = 6.8 Hz, 4H), 7.38-7.45 (m, 6H), 5.71-5.78 (m, 2H), 5.64 (d, *J* = 10.4 Hz, 1H), 5.47 (dd, *J* = 15.2 Hz, 7.6 Hz, 1H), 4.81 (m, 1H), 4.33 (m, 1H), 4.12-4.21 (m, 3H), 4.04 (q, *J* = 4.8 Hz, 1H), 3.89 (m, 1H), 3.68 (t, *J* = 6.4 Hz, 2H), 2.53 (d, *J* = 17.6 Hz, 1H), 2.33 (td, *J* = 12.0 Hz, 7.6 Hz, 1H), 2.12-2.18 (m, 4H), 2.00-2.05 (m, 3H), 1.93 (dd, *J* = 12.8 Hz, 6.4 Hz, 1H), 1.87 (d, *J* = 14.8 Hz, 1H), 1.78 (dd, *J* = 14.8 Hz, 4.0 Hz, 1H), 1.66-1.72 (m, 3H), 1.22 (s, 9H), 1.09-1.12 (m, 21H), 1.07 (s, 9H), 0.94 (d, *J* = 6.8 Hz, 3H); <sup>13</sup>C NMR (CDCl<sub>3</sub>, 100 MHz): δ 178.5, 135.6, 134.0, 133.3, 129.5, 129.4, 128.5, 127.6, 122.5, 110.0, 105.6, 79.2, 76.7, 72.5, 72.0, 71.0, 66.0, 63.3, 38.8, 36.7, 35.2, 34.9, 32.2, 31.8, 31.4, 29.5, 28.7, 27.2, 26.9, 19.2, 18.2, 18.1, 16.2, 12.7; IR (neat): 2940, 2865, 2361, 1731, 1138 cm<sup>-1</sup>; [α]<sub>D</sub><sup>25</sup> -11.4 (c 0.79, CHCl<sub>3</sub>); HRMS-ESI (*m/z*) calculated for [M+Na<sup>+</sup>]: 911.5289, found: 911.5318.

## References:

- (1) Rao, K. S.; Chattapadhyay, A. K.; Ghosh, S. *Synlett*. **2010**, *20*, 3078.
- (2) Fürstner, A.; Bouchez, L. C.; Funel, J. A.; Liepins, V.; Porée, F. H.; Gilmour, R.; Beaufils, F.; Laurich, D.; Tamiya, M. *Angew. Chem. Int. Ed.* **2007**, *46*, 9265.
- (3) Bull, J. A.; Balskus, E. P.; Horan, R. J.; Langer, M.; Ley, S. V. *Chem. Eur. J.* **2007**, *13*, 5515.

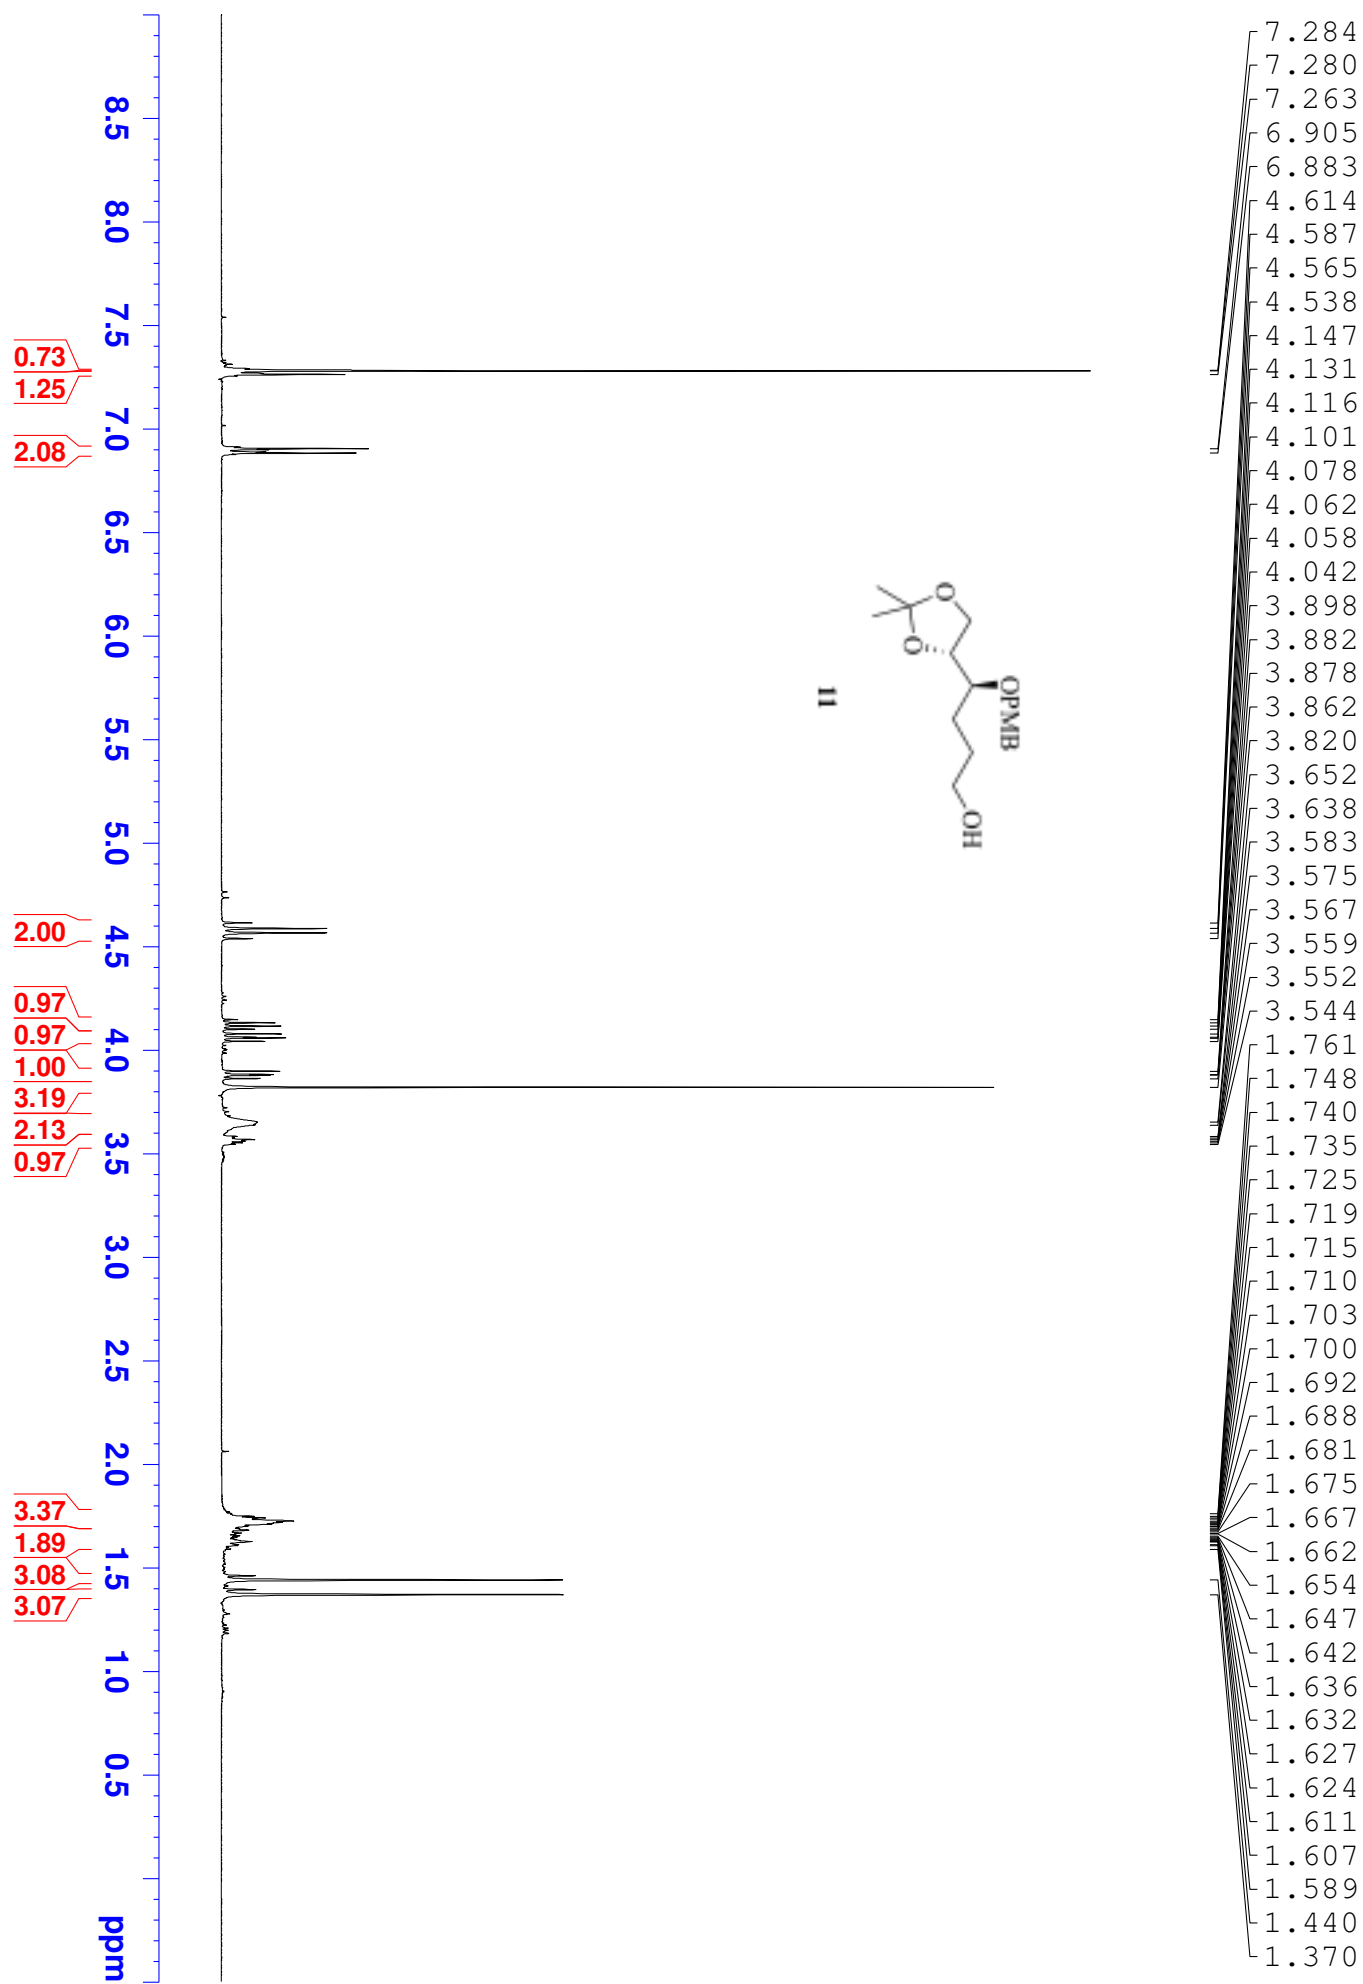



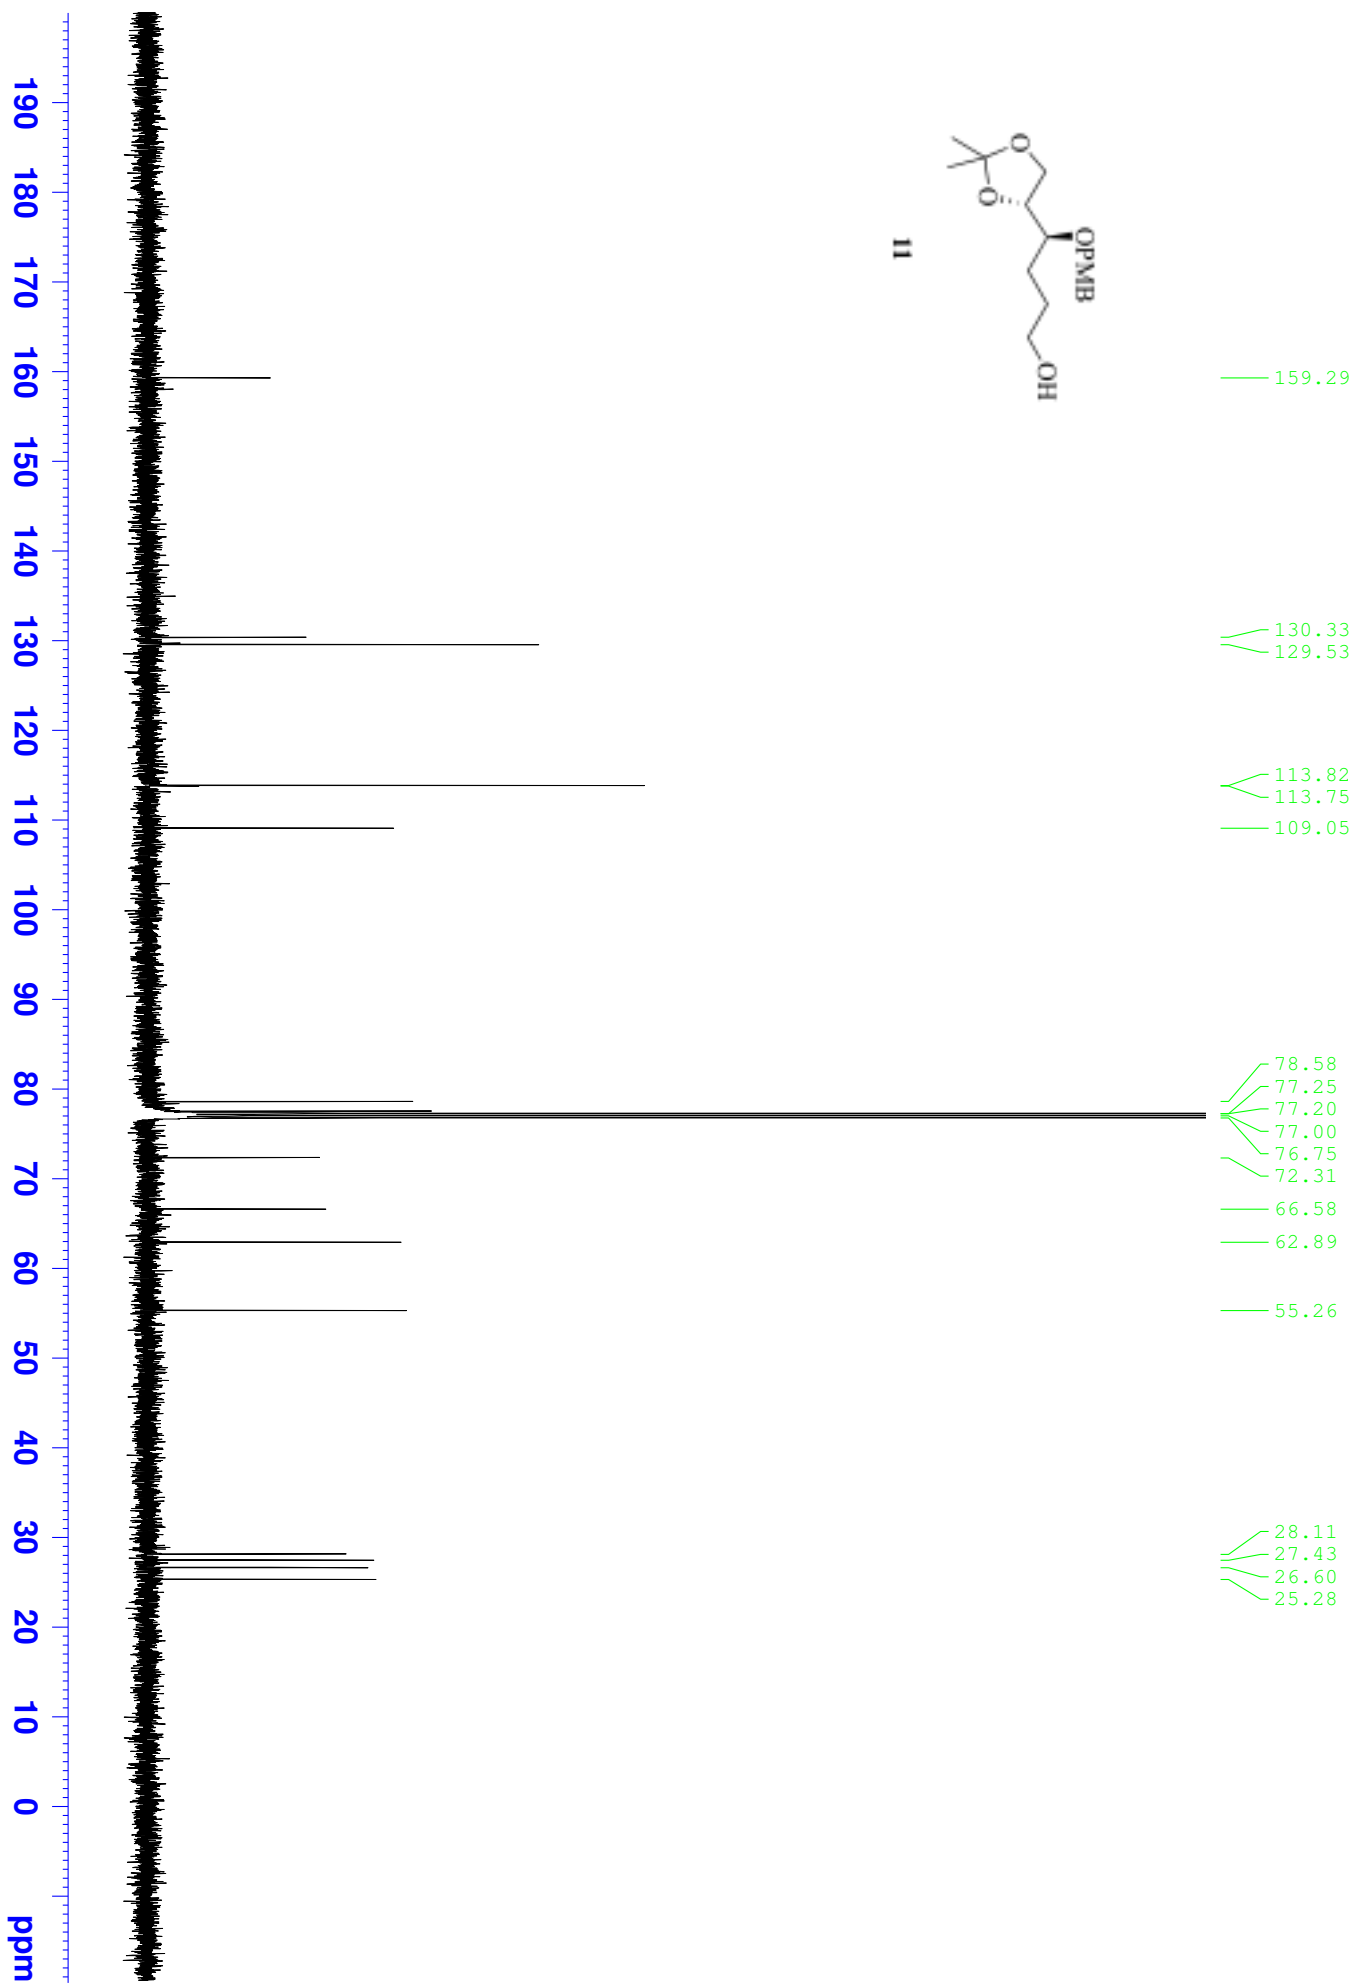

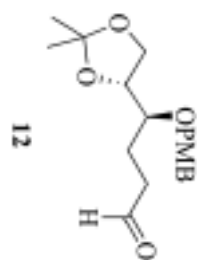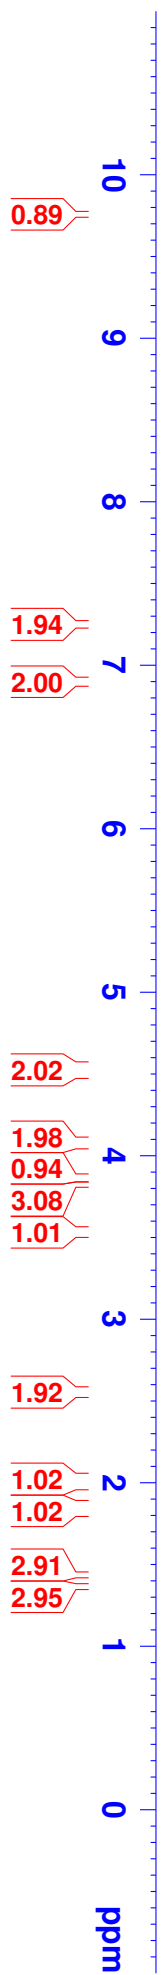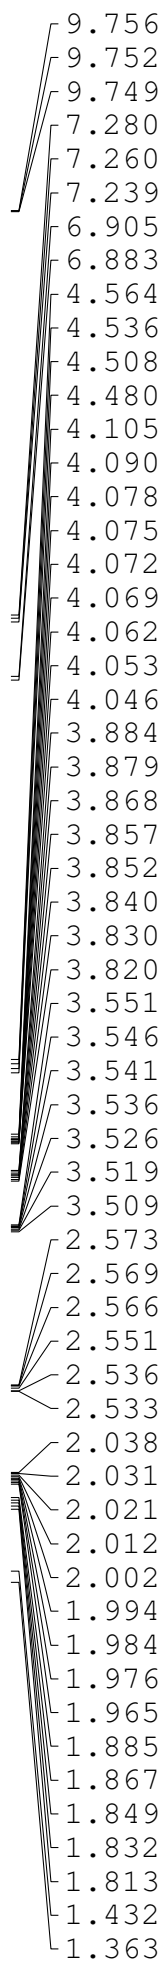

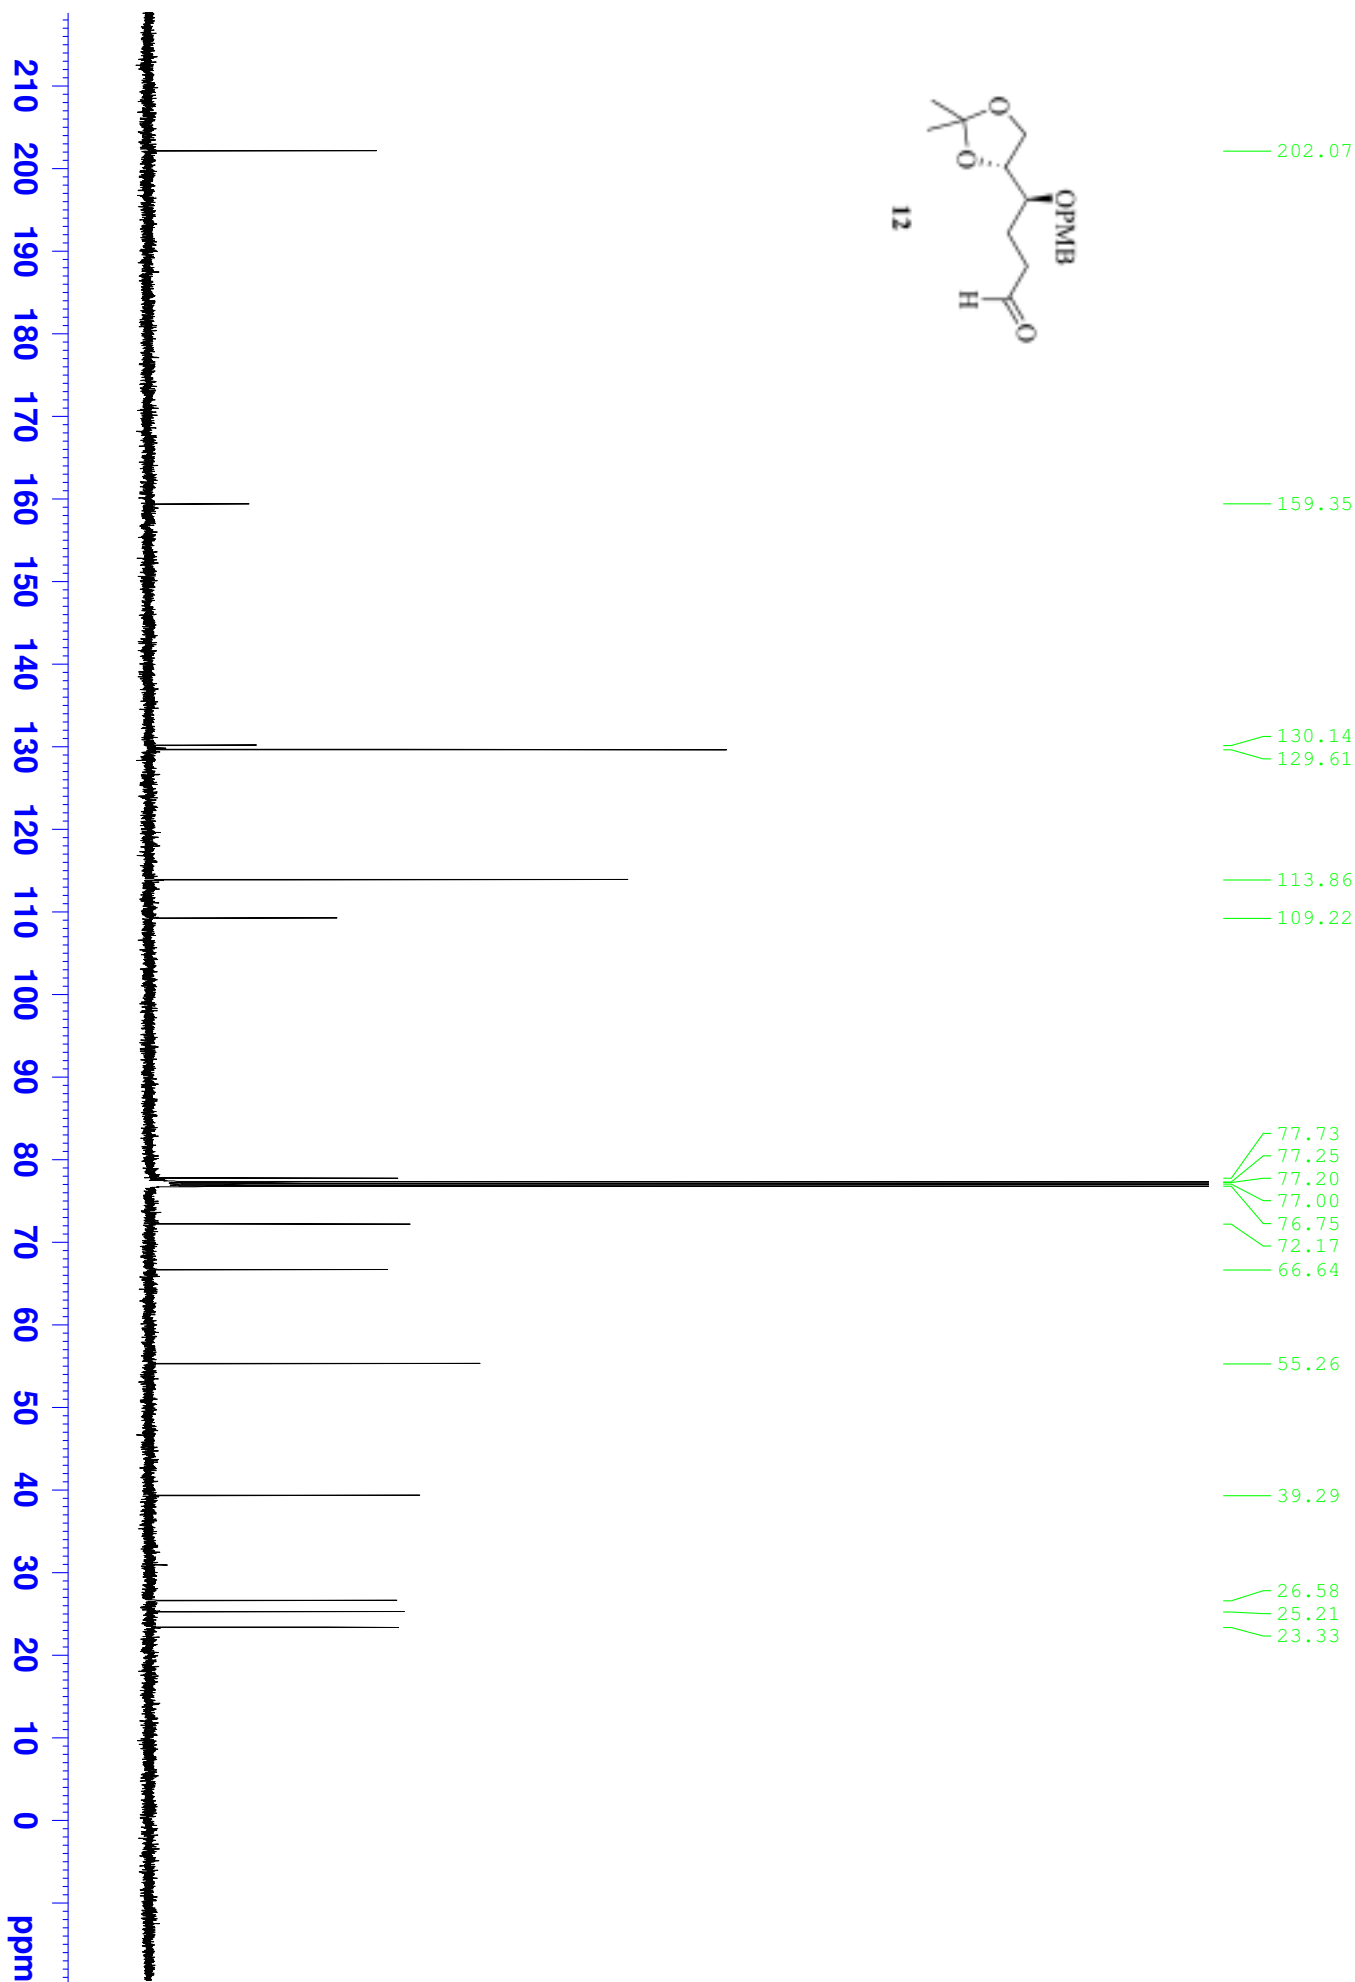

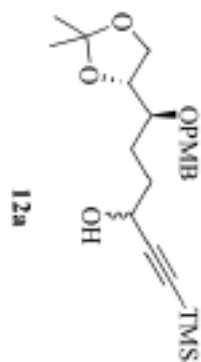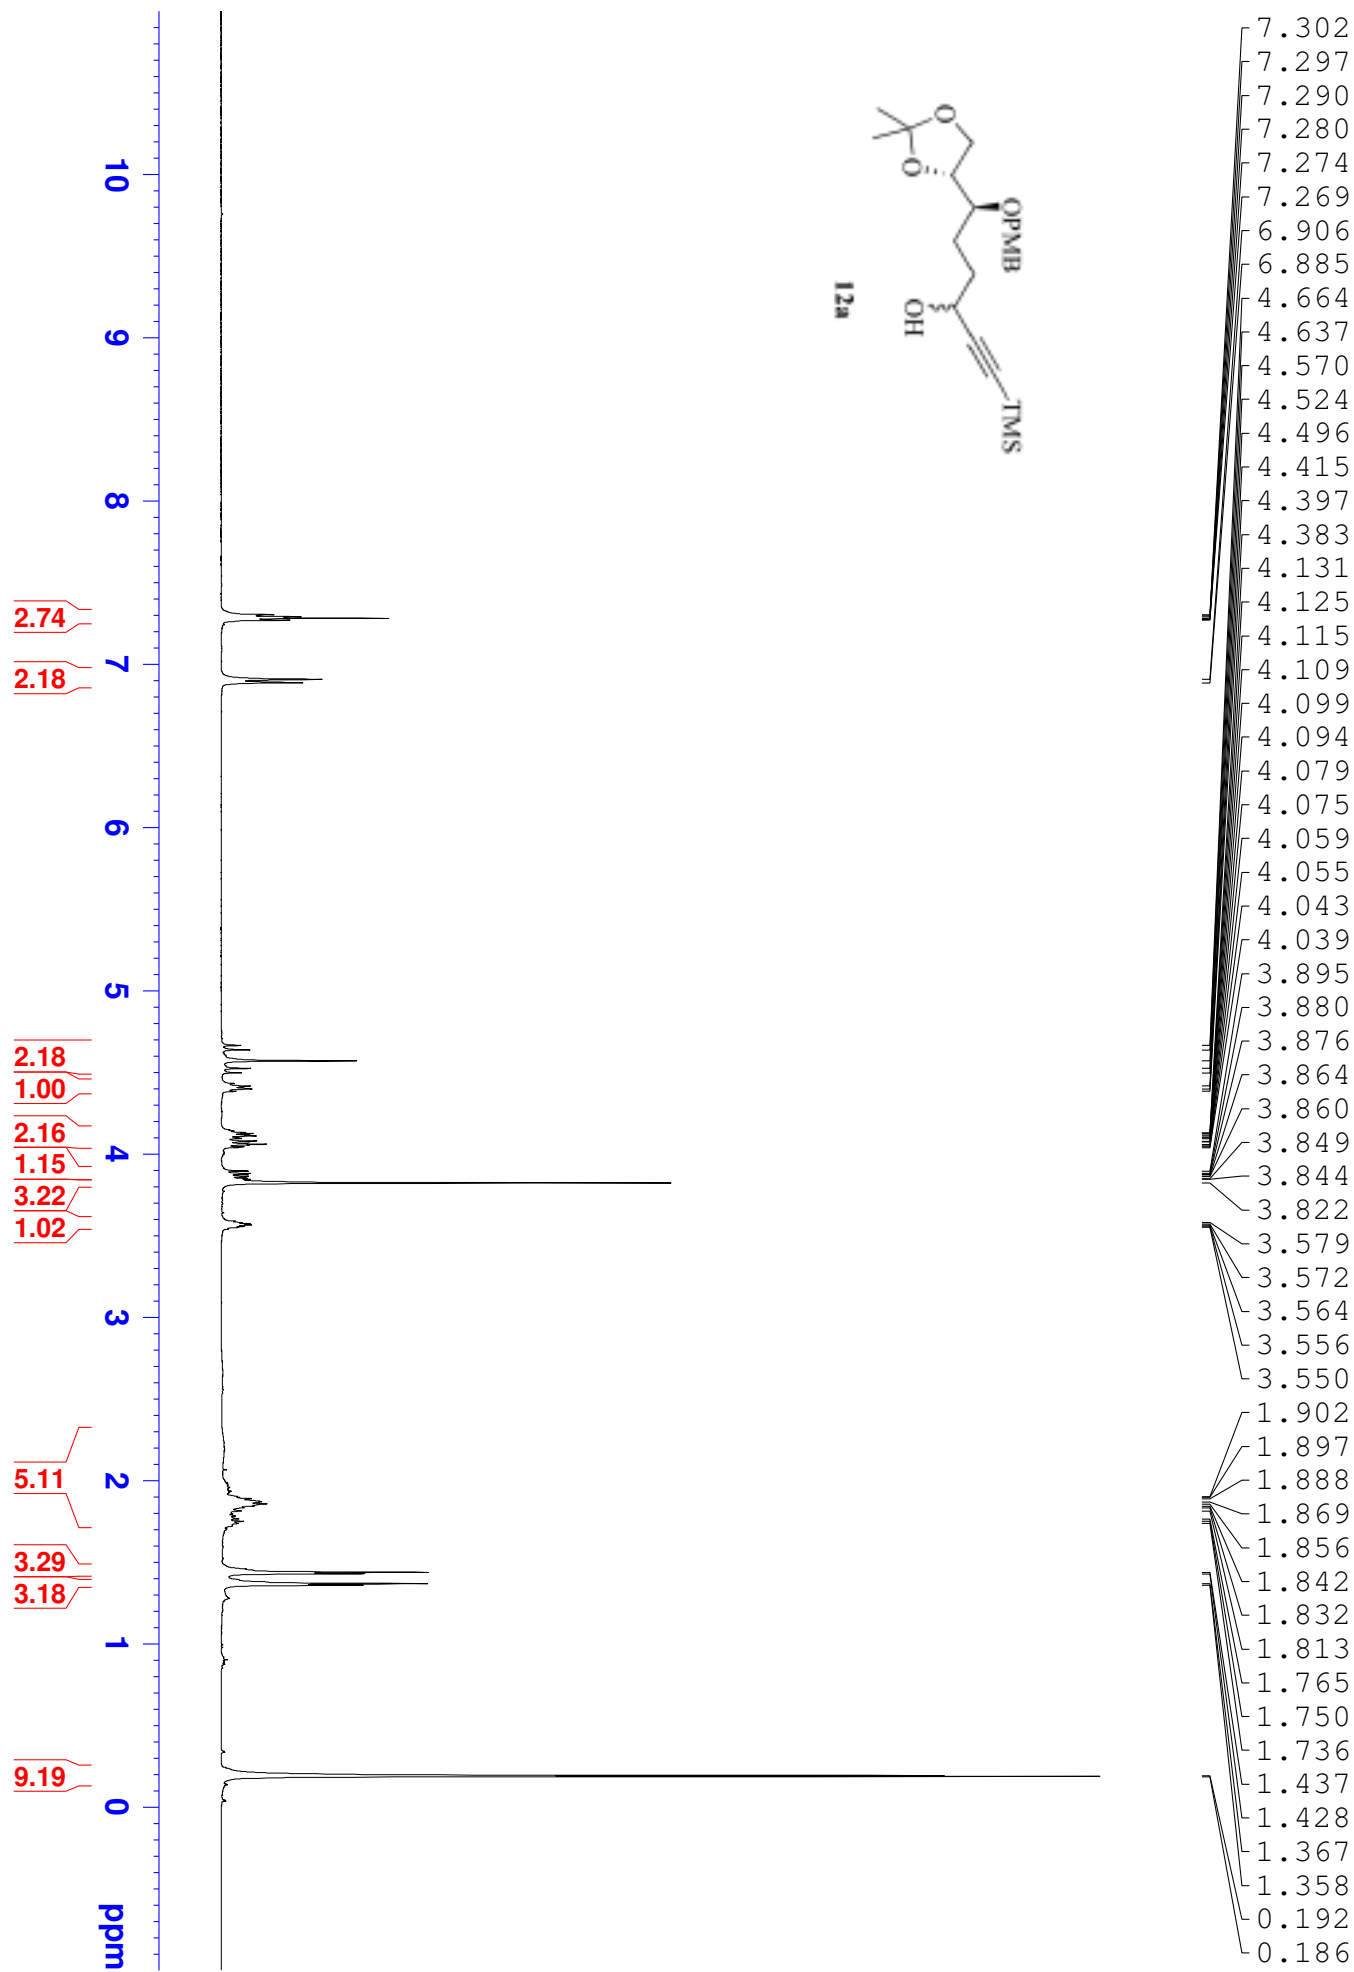

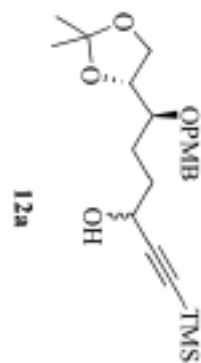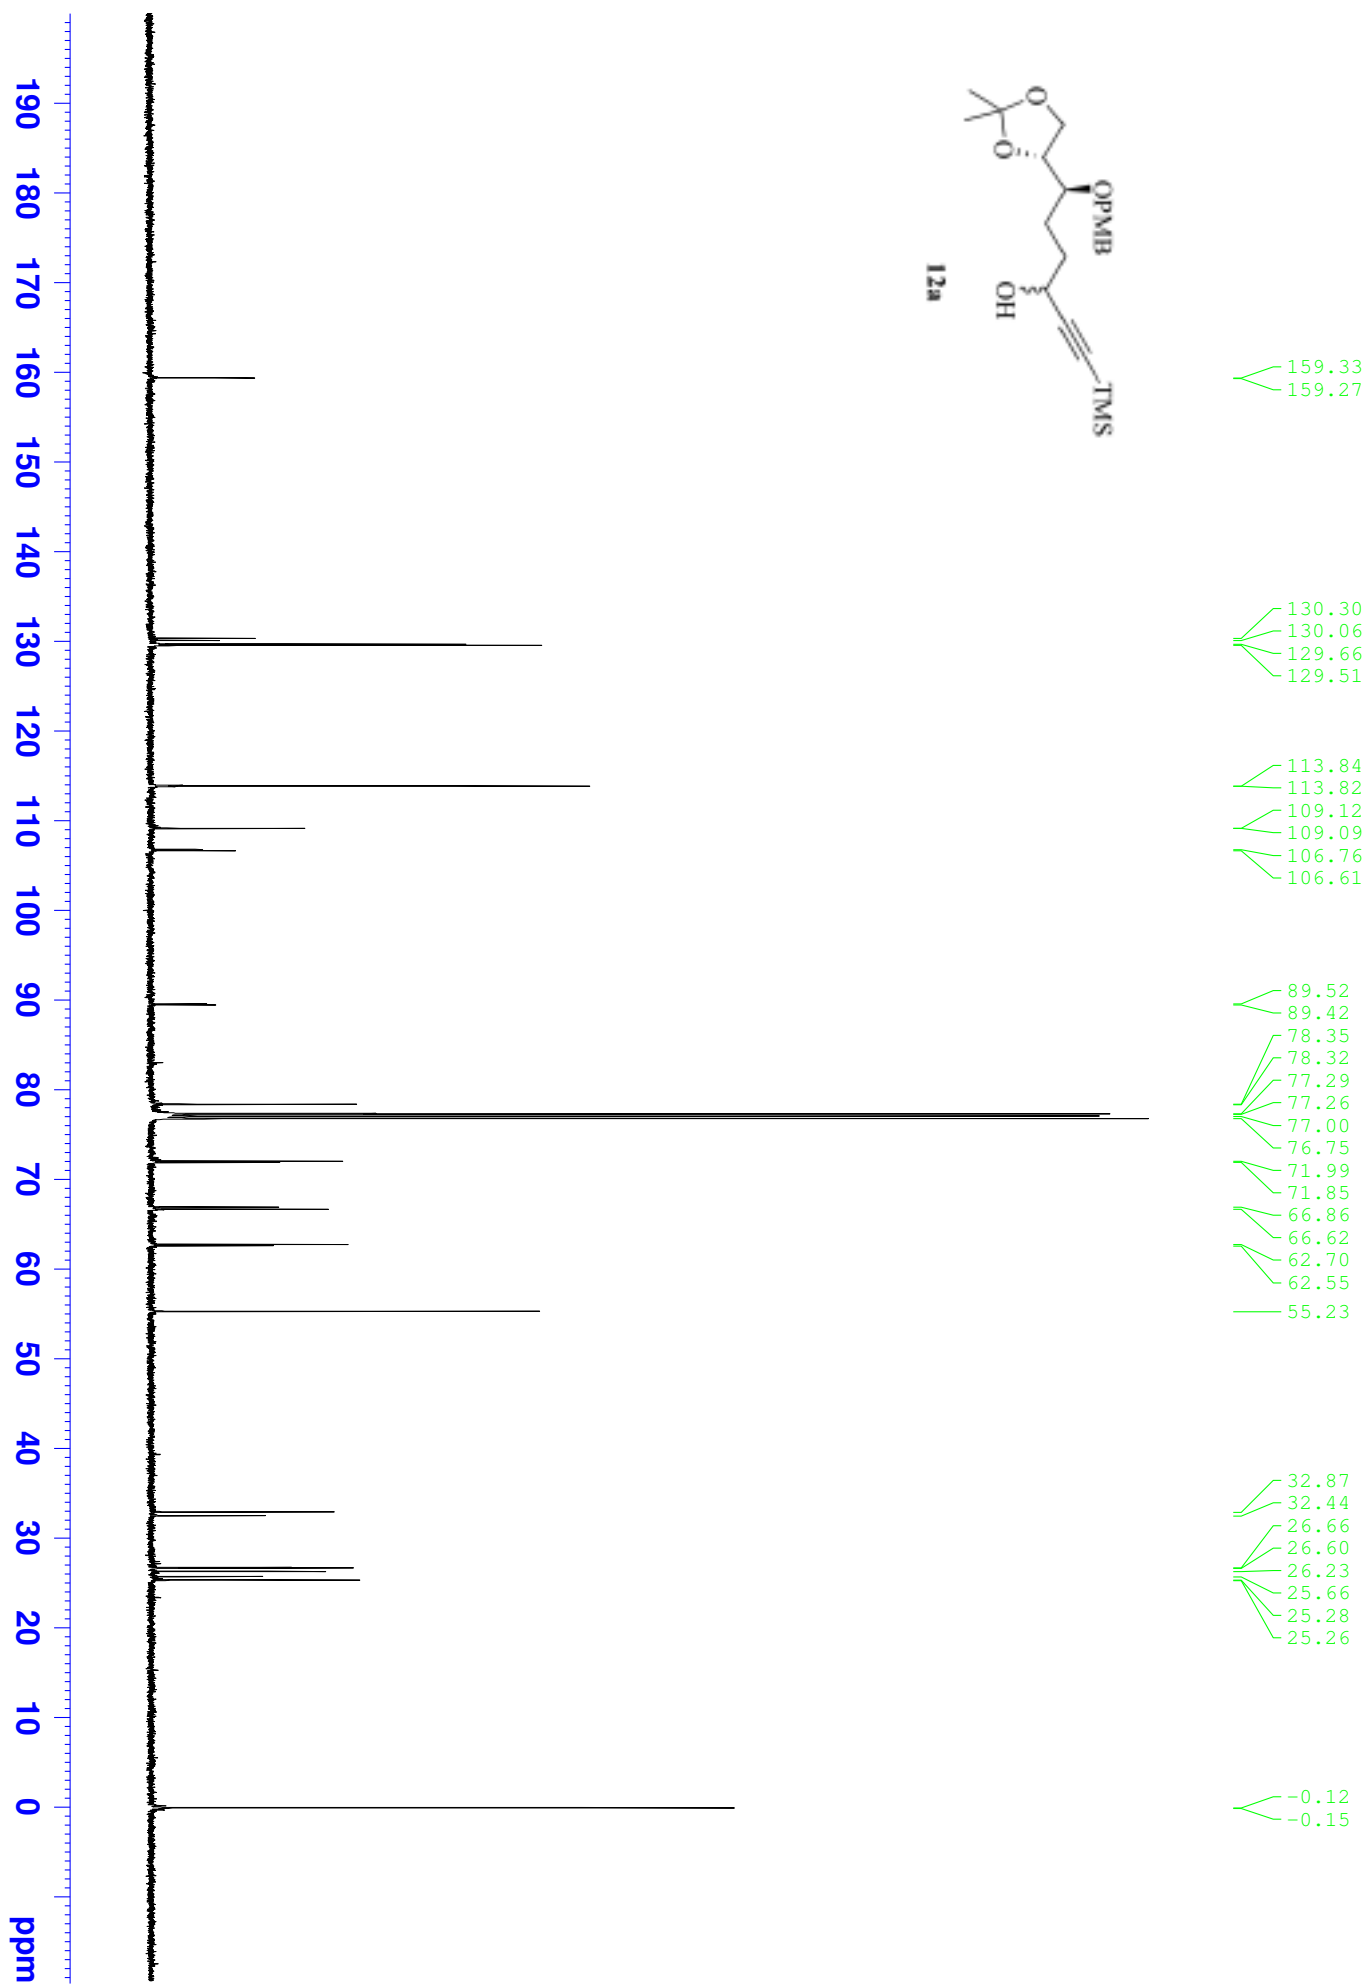

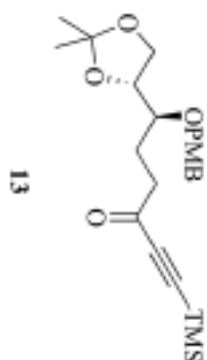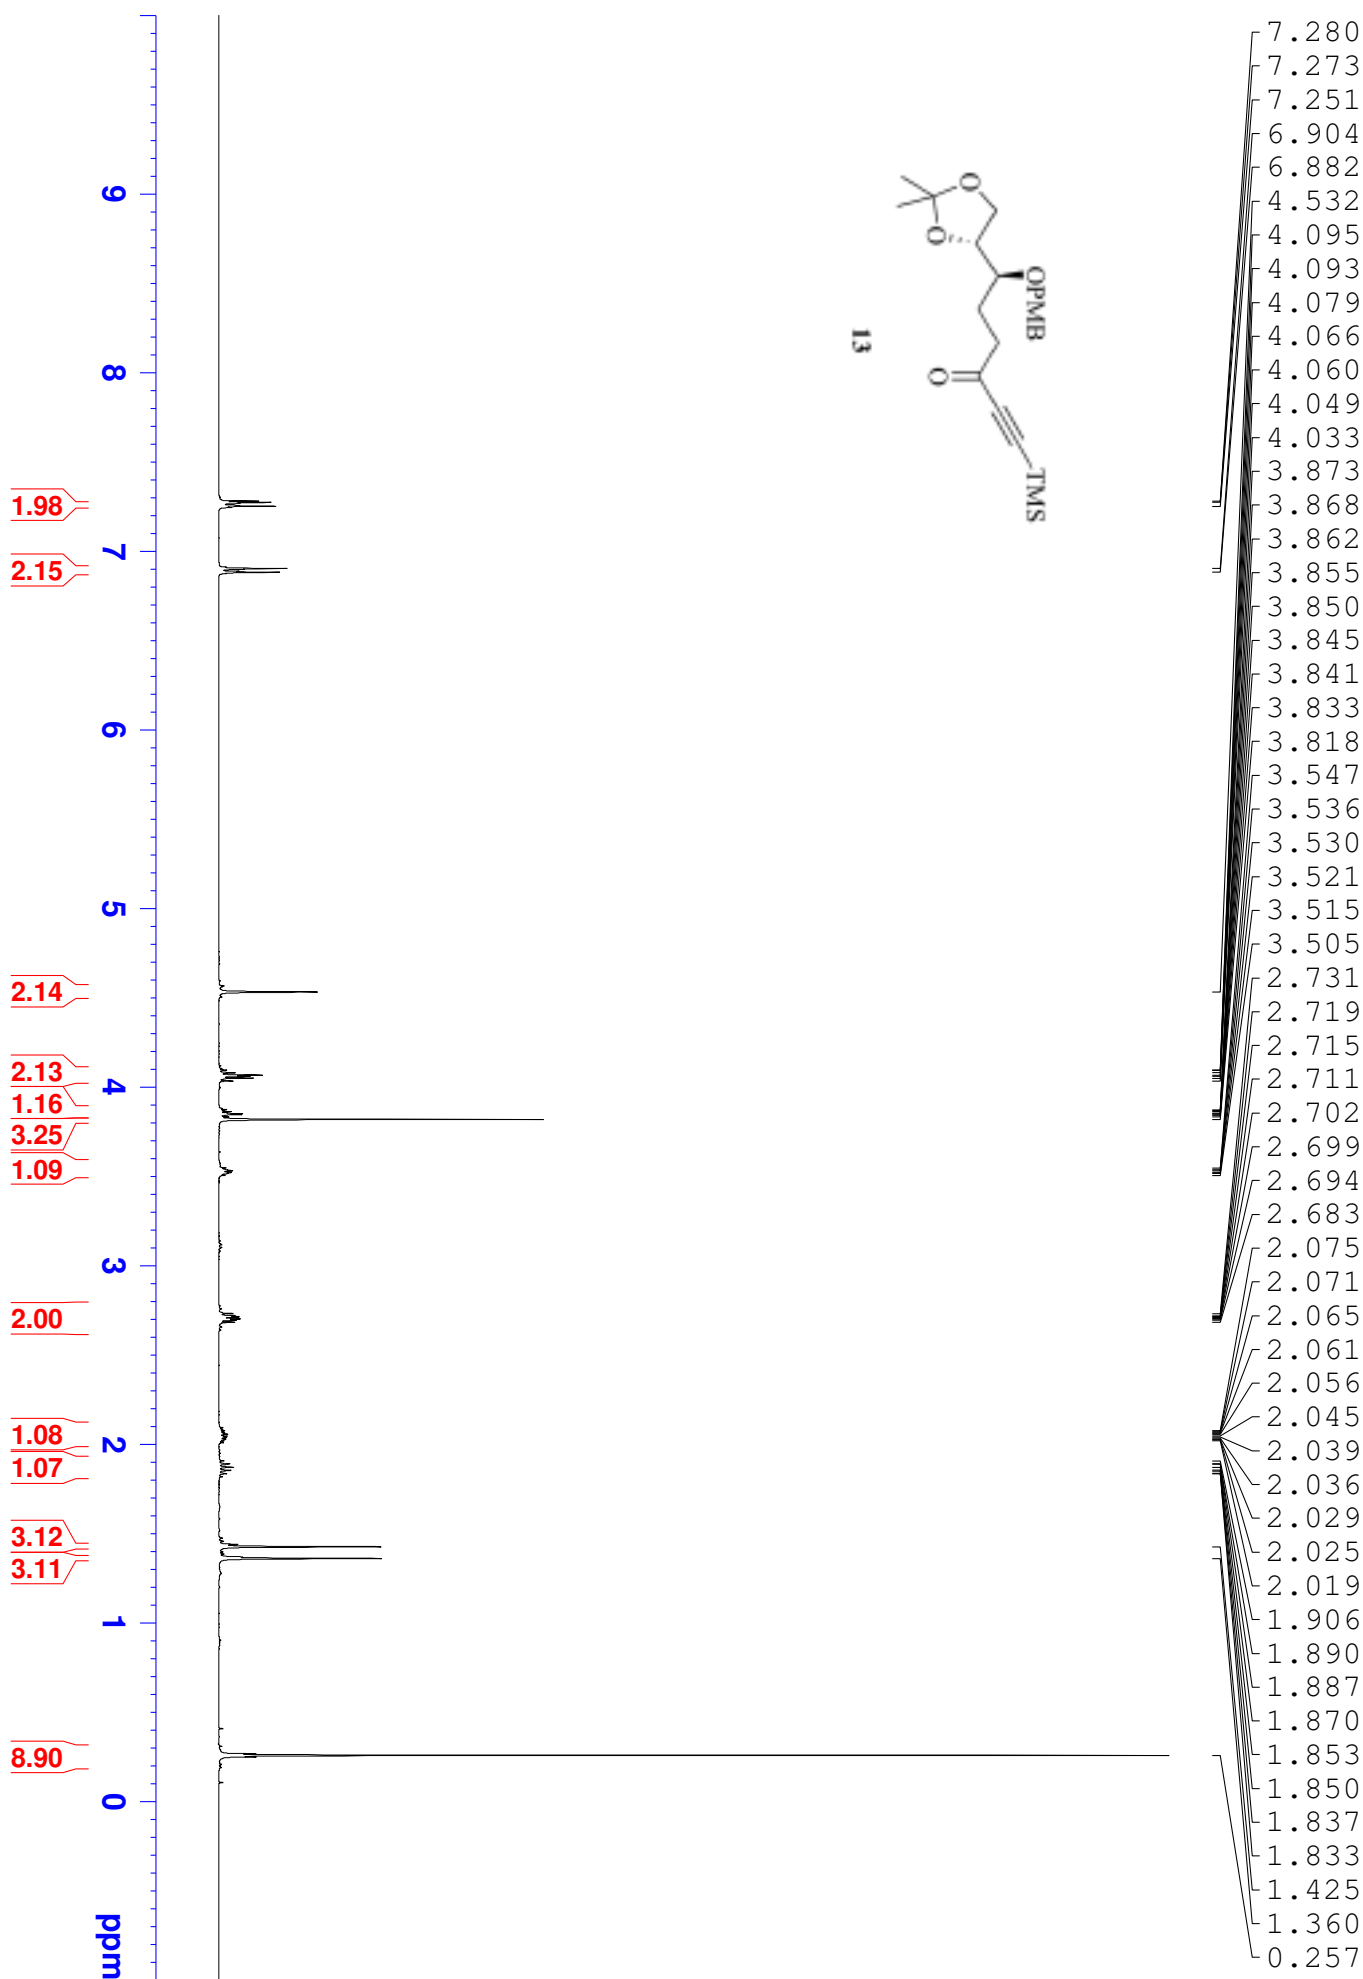

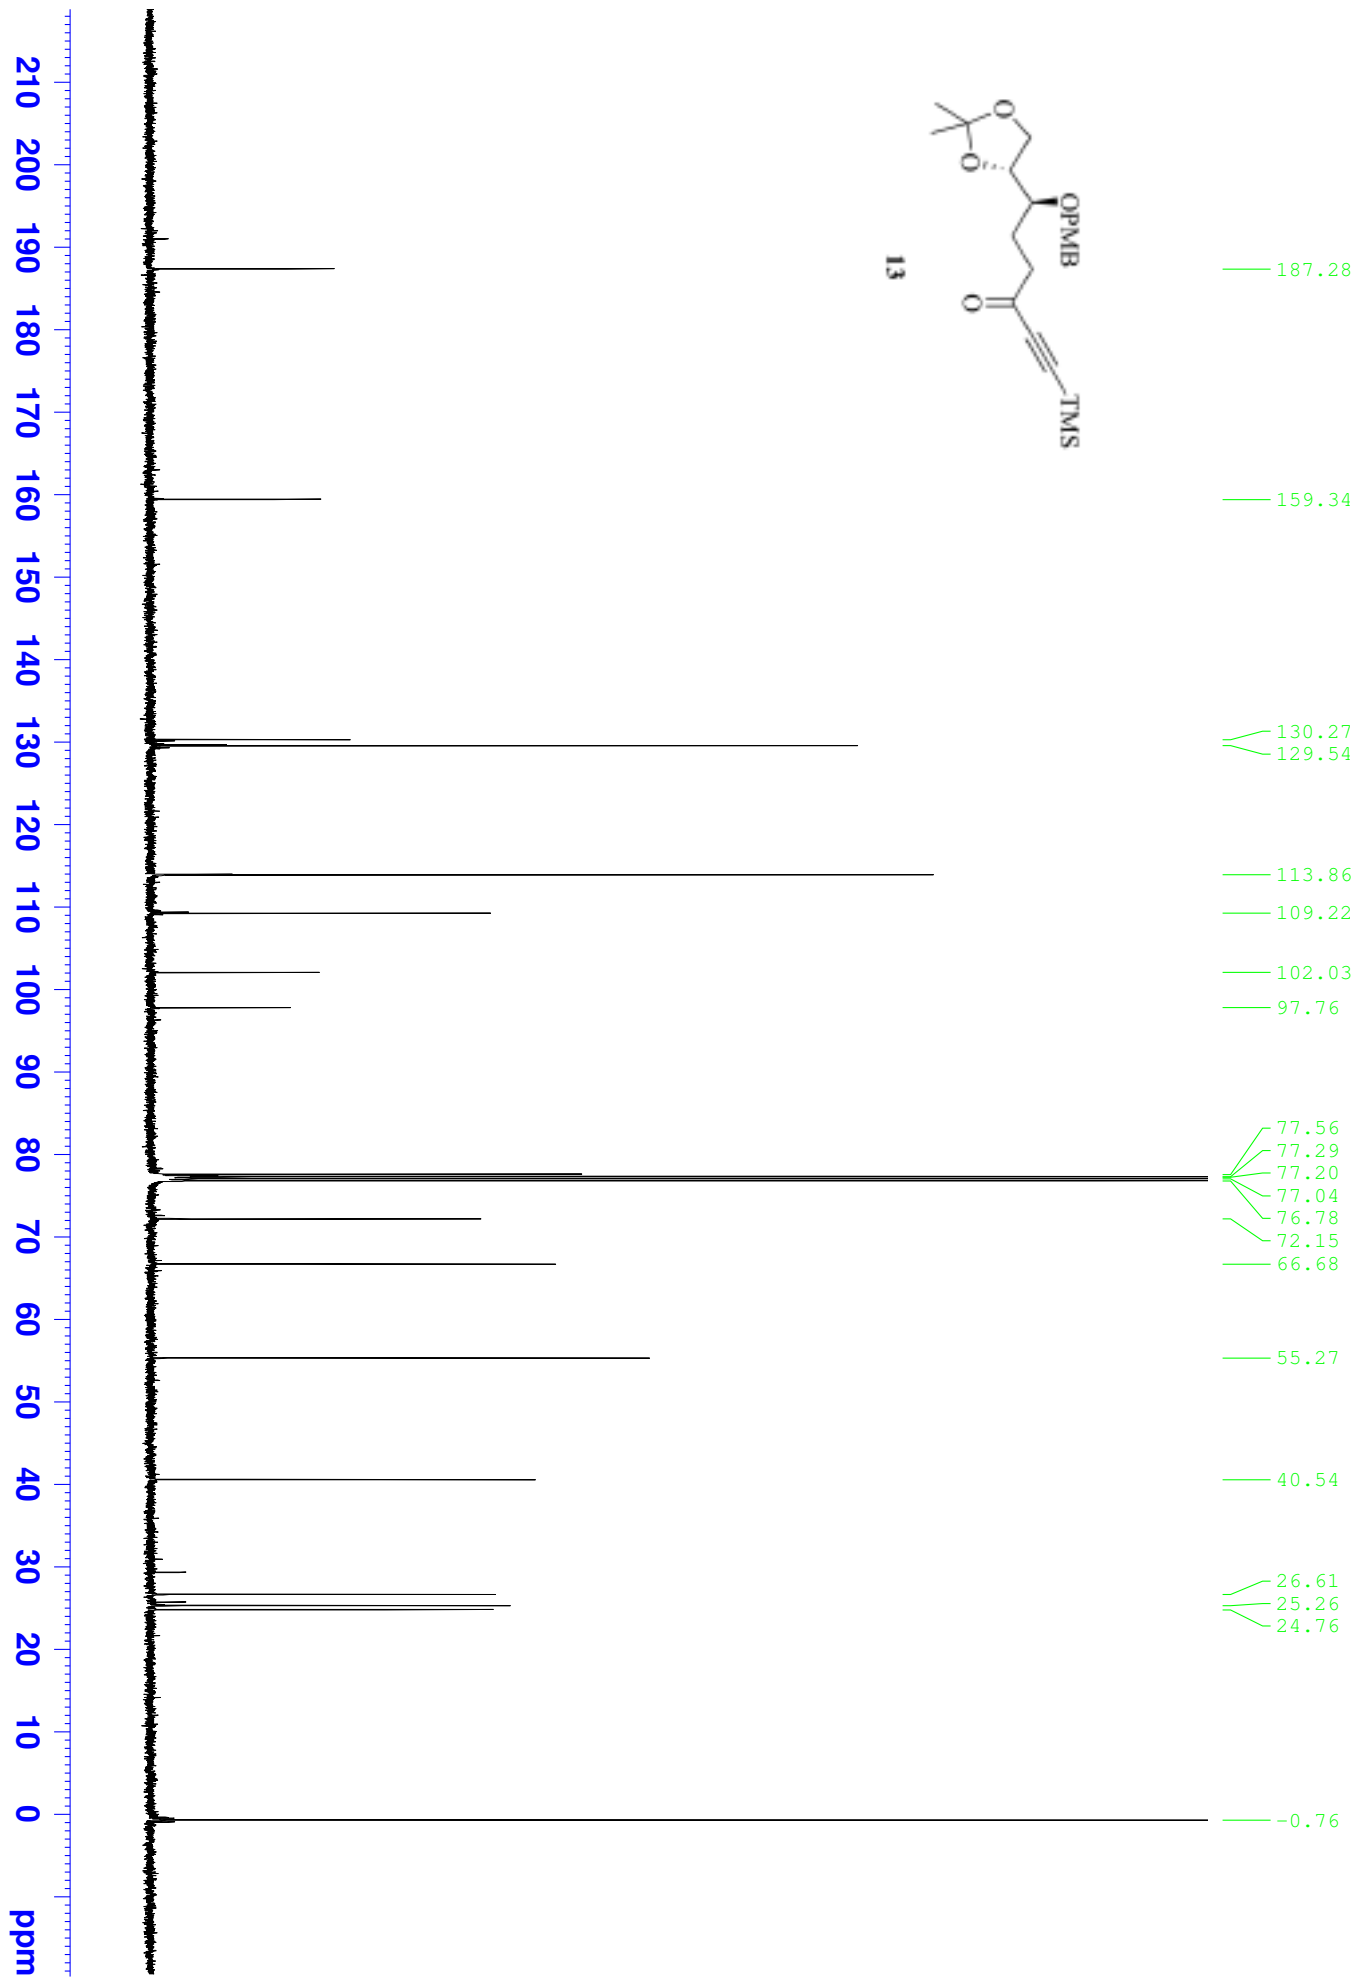

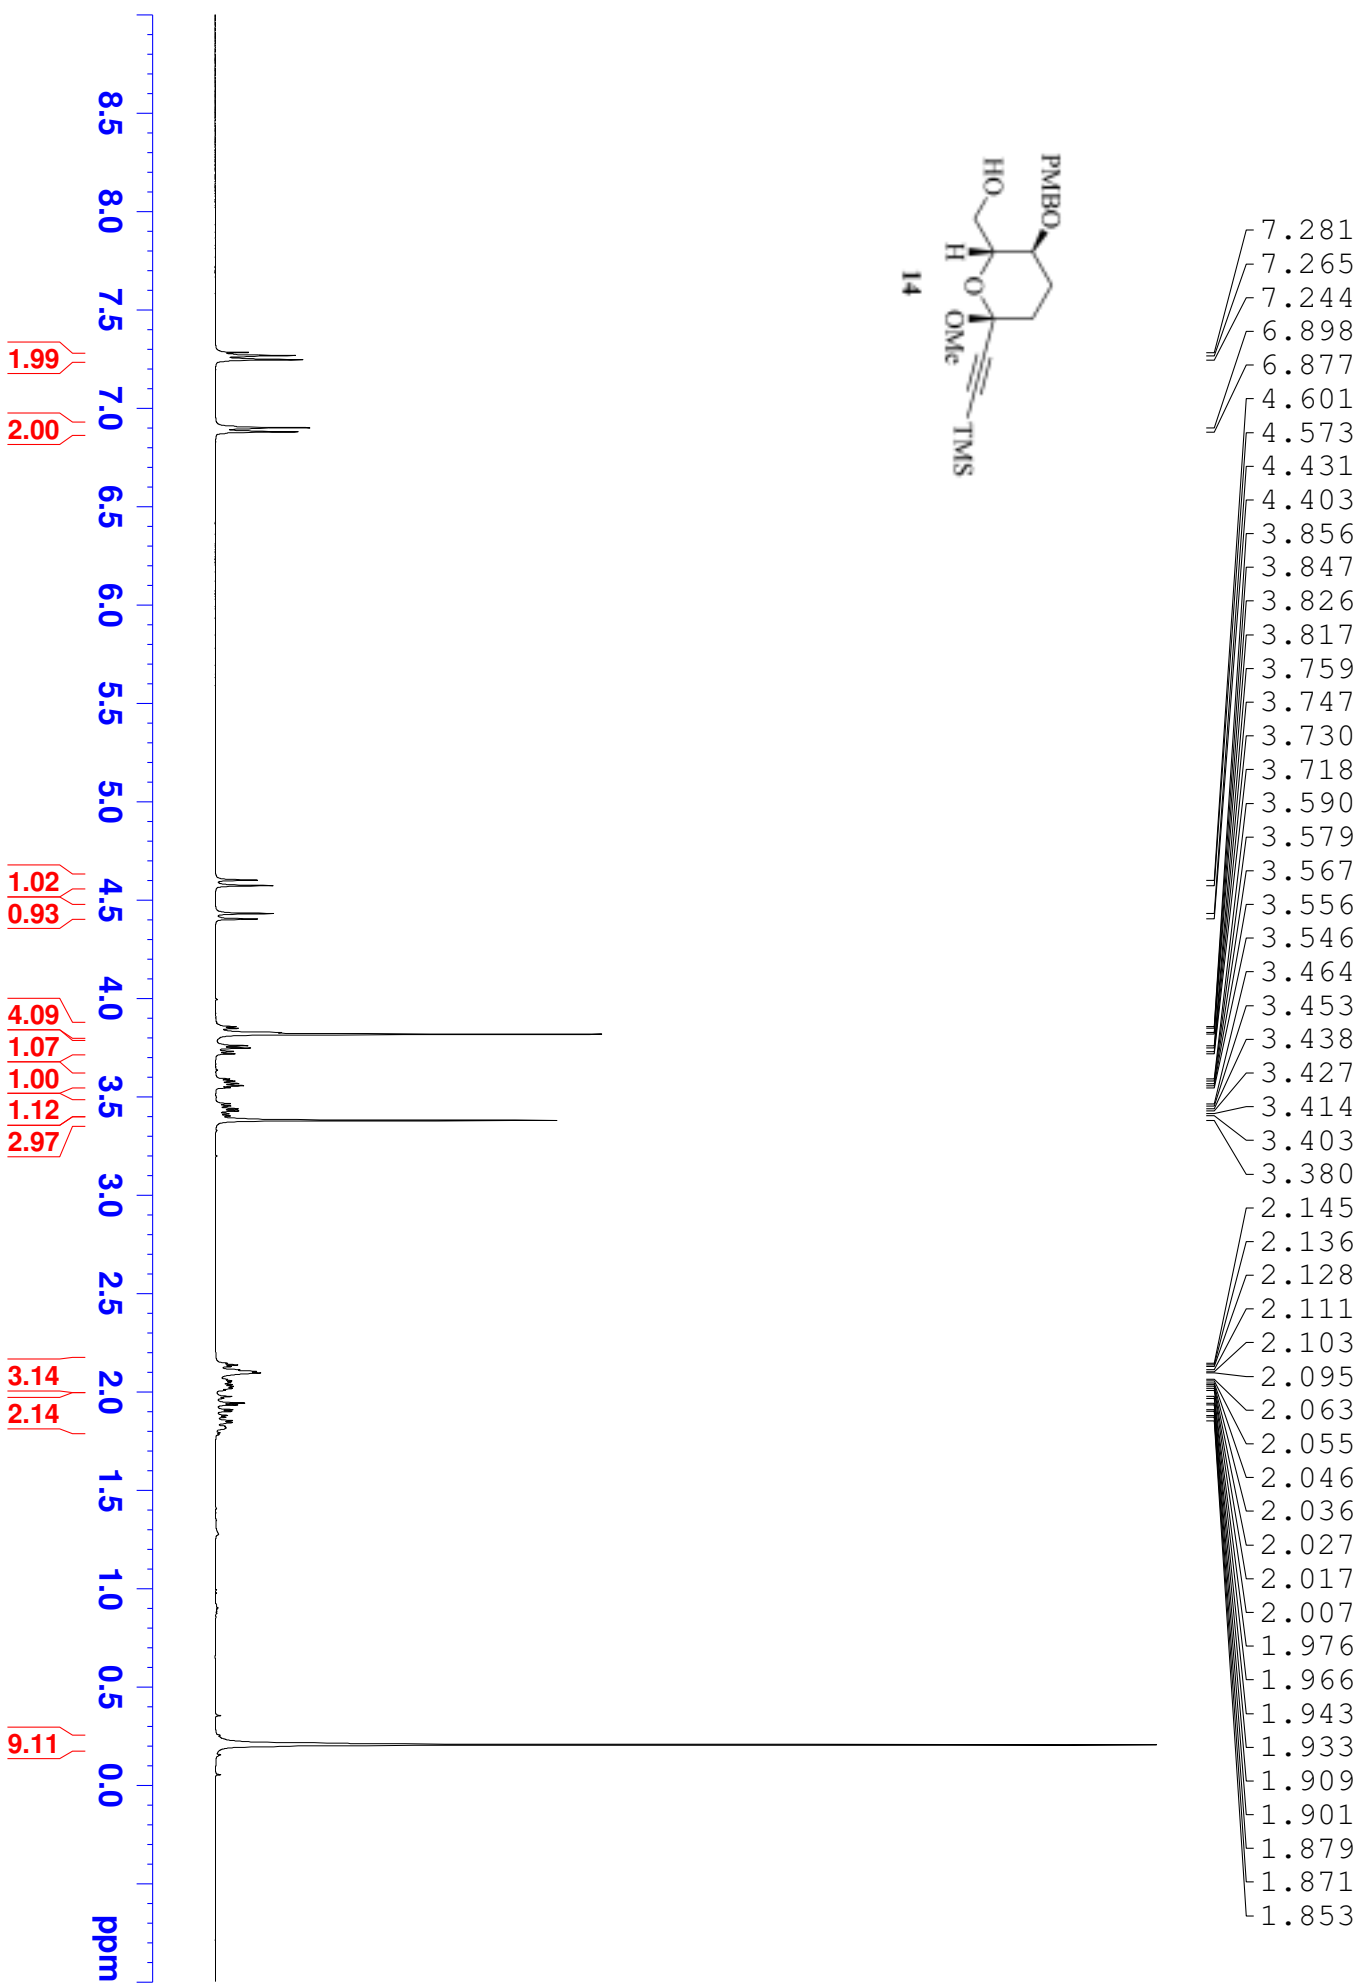



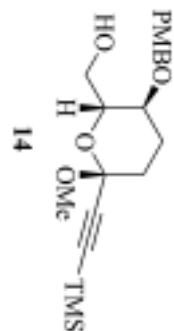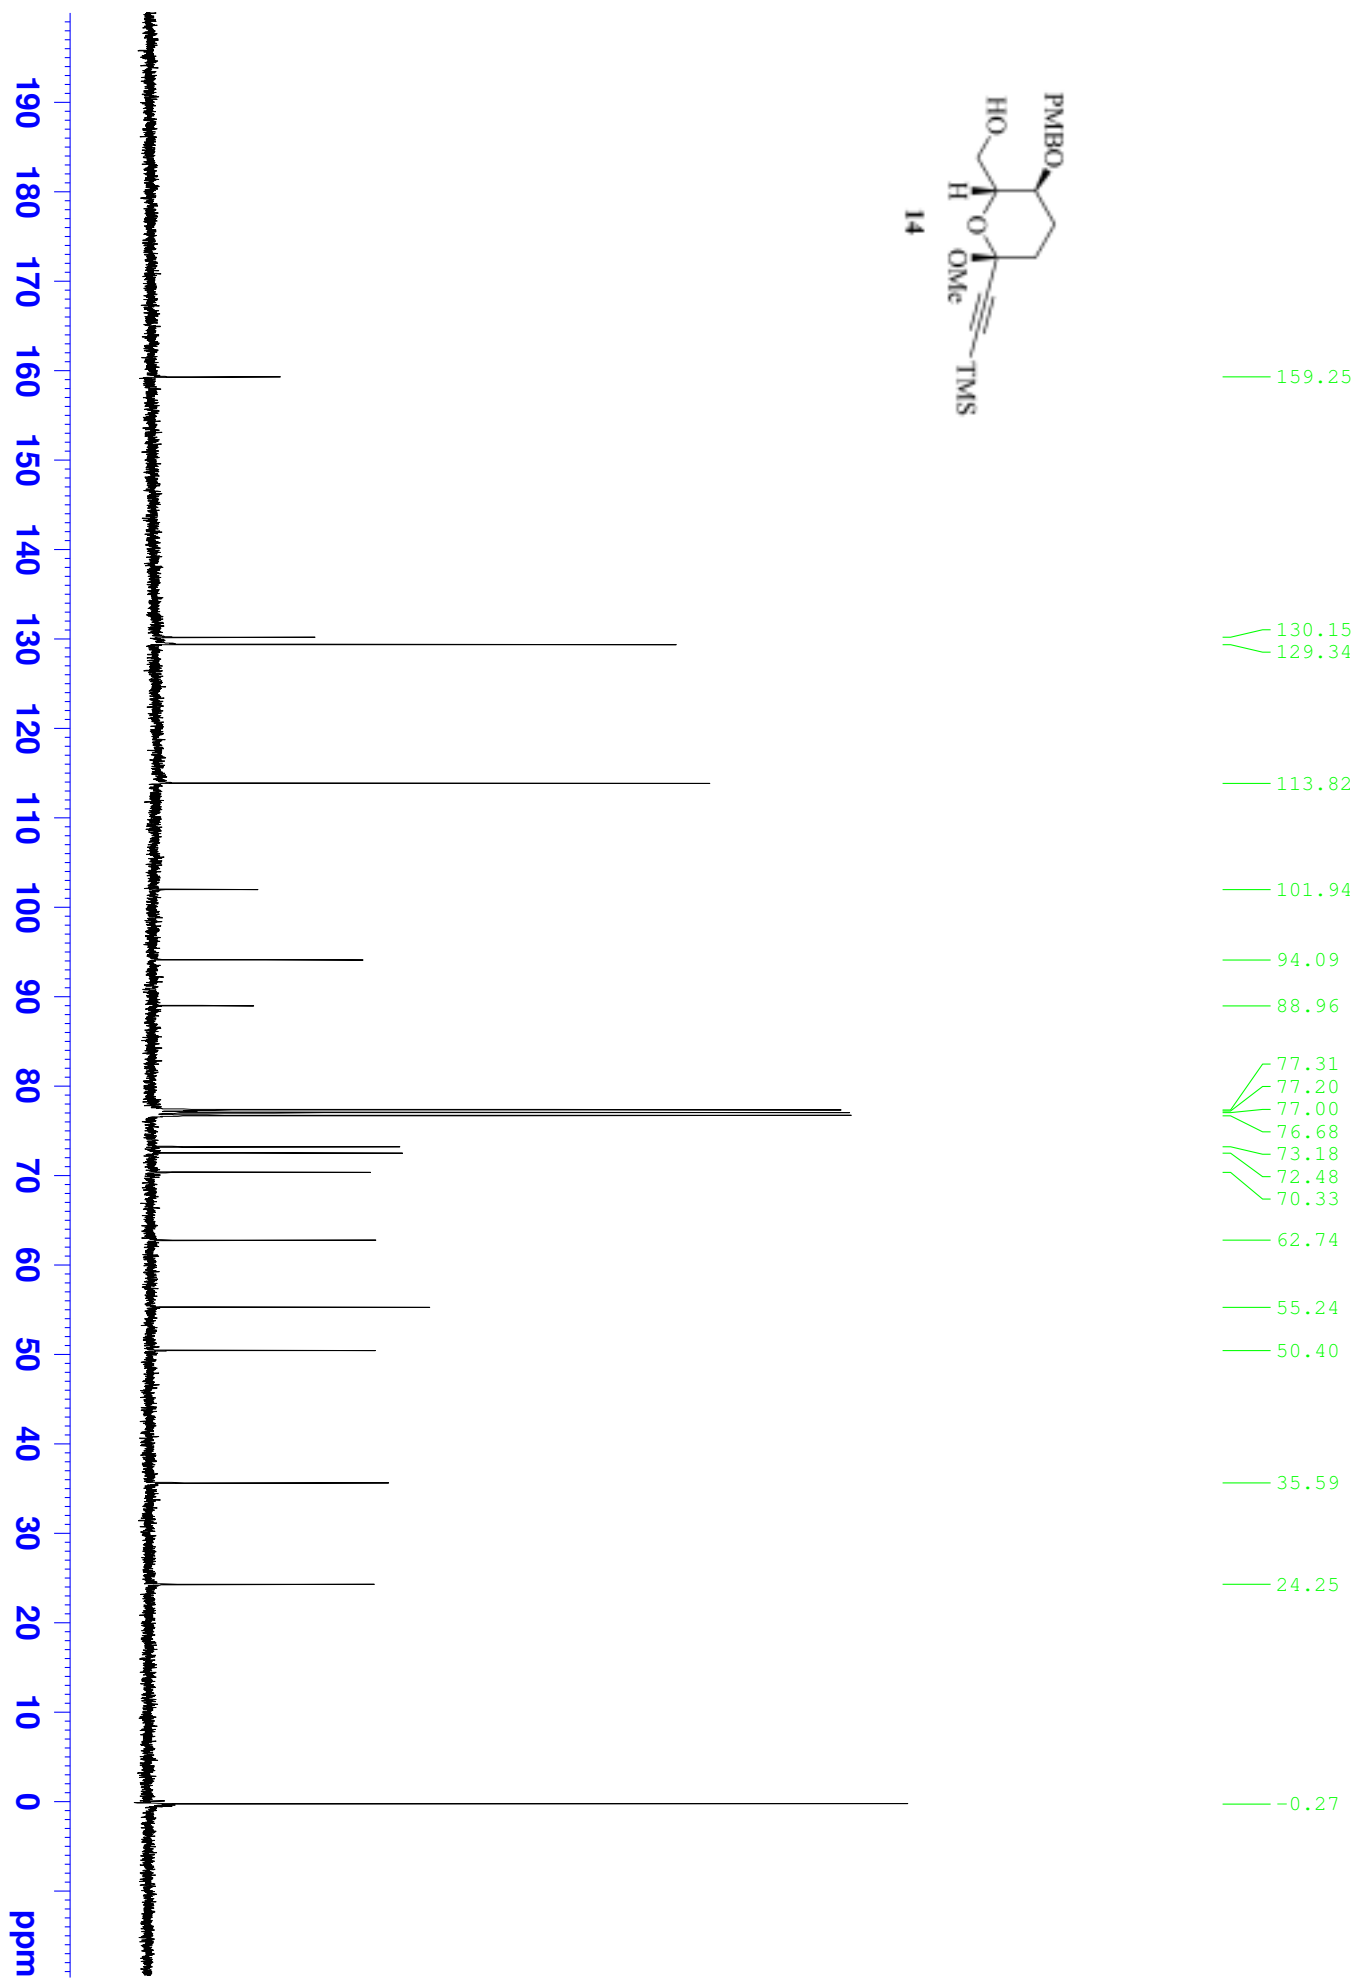

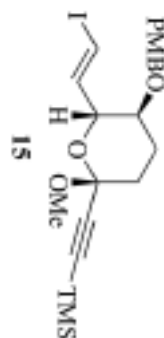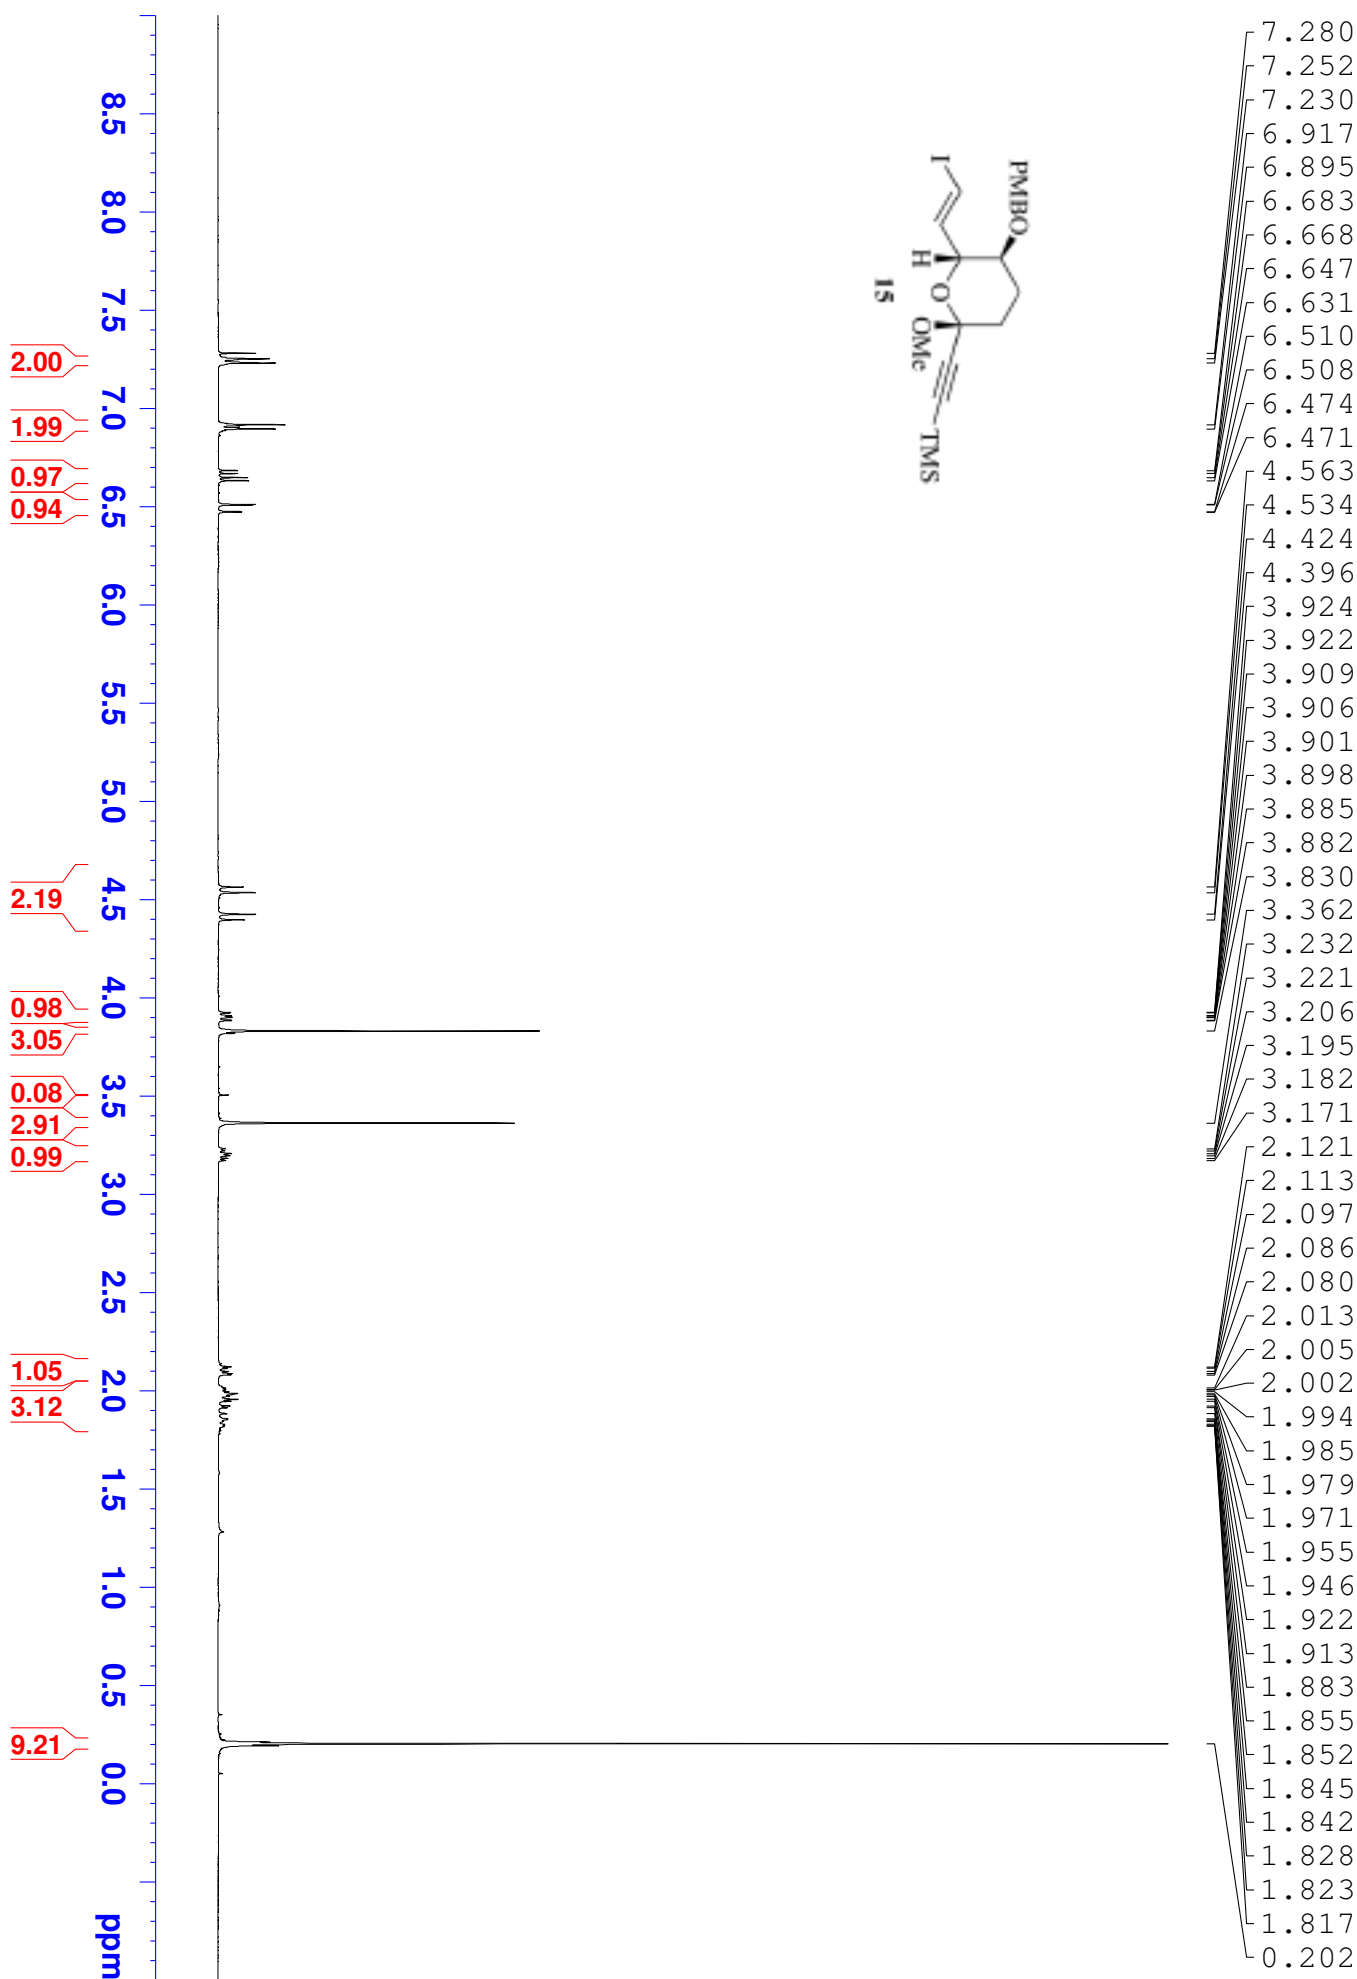

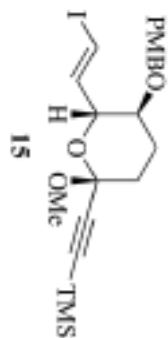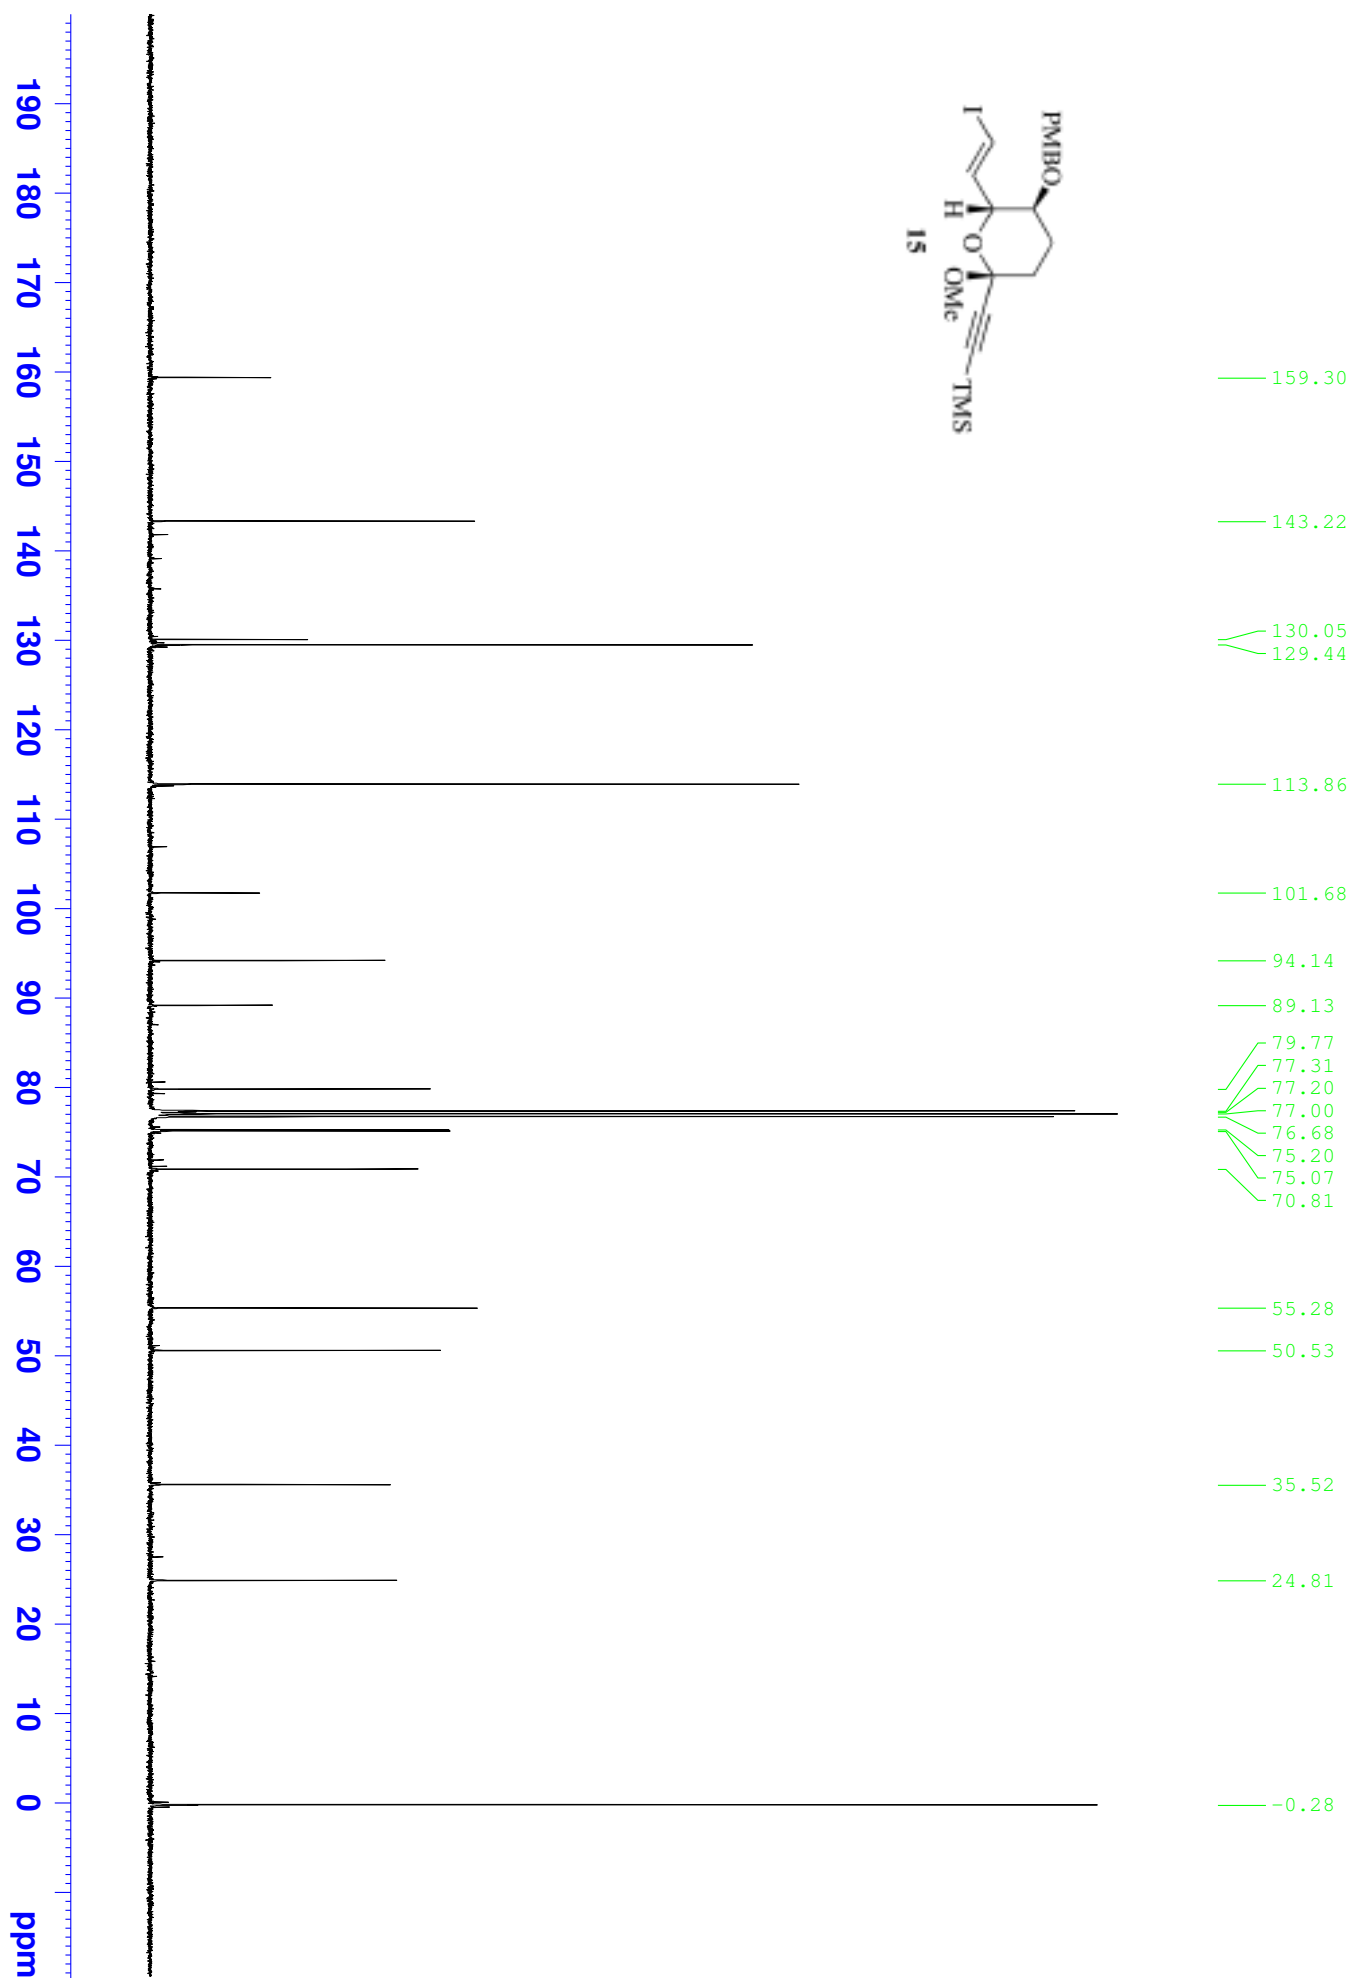

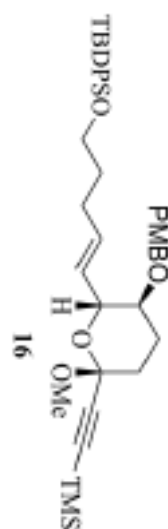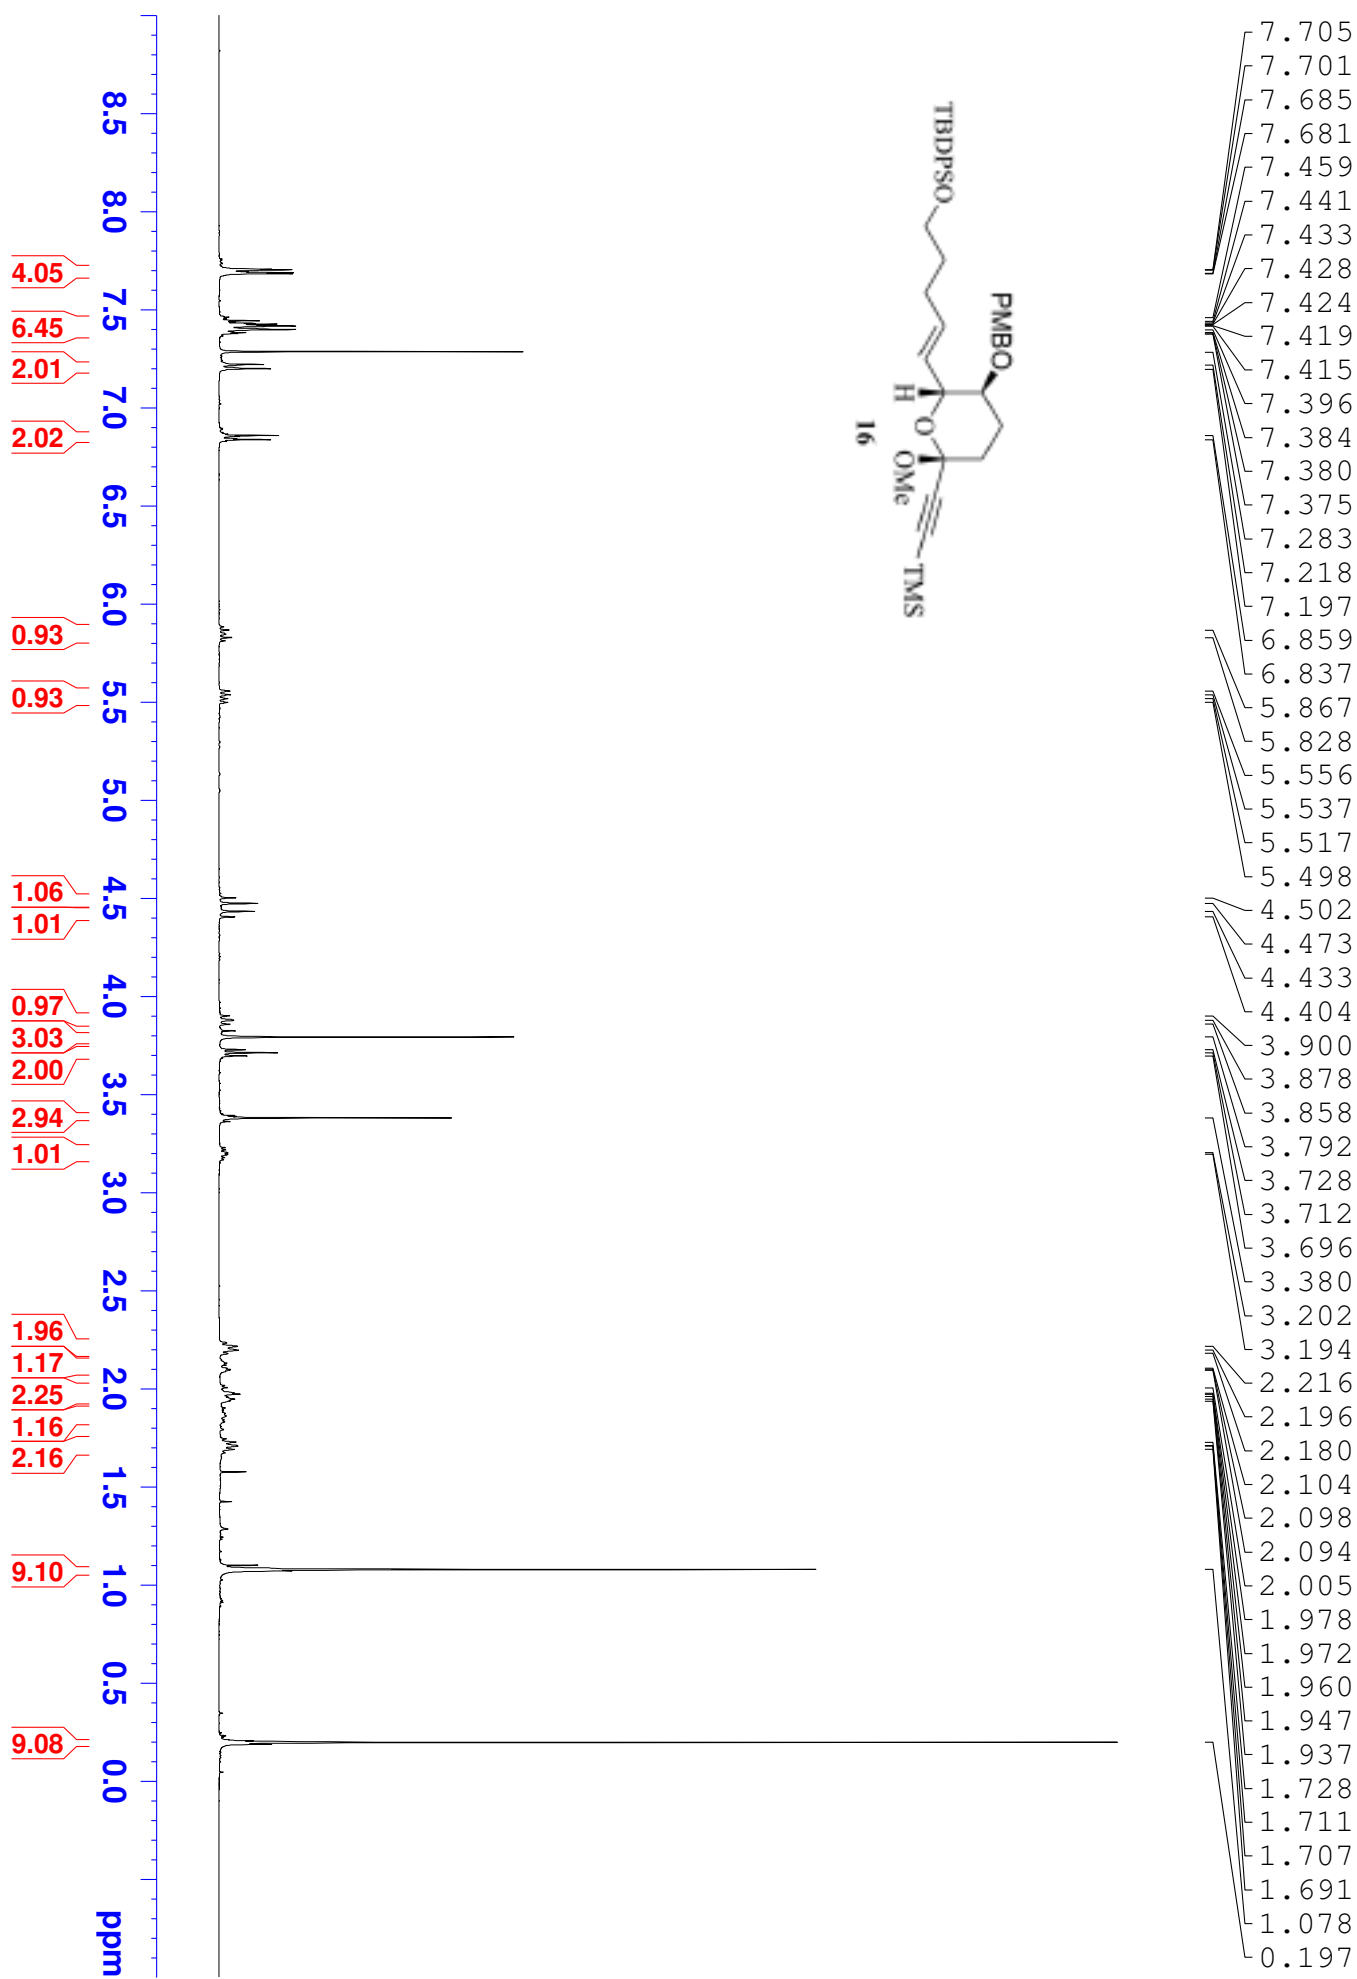

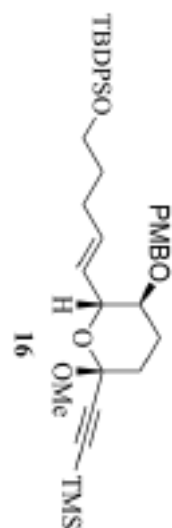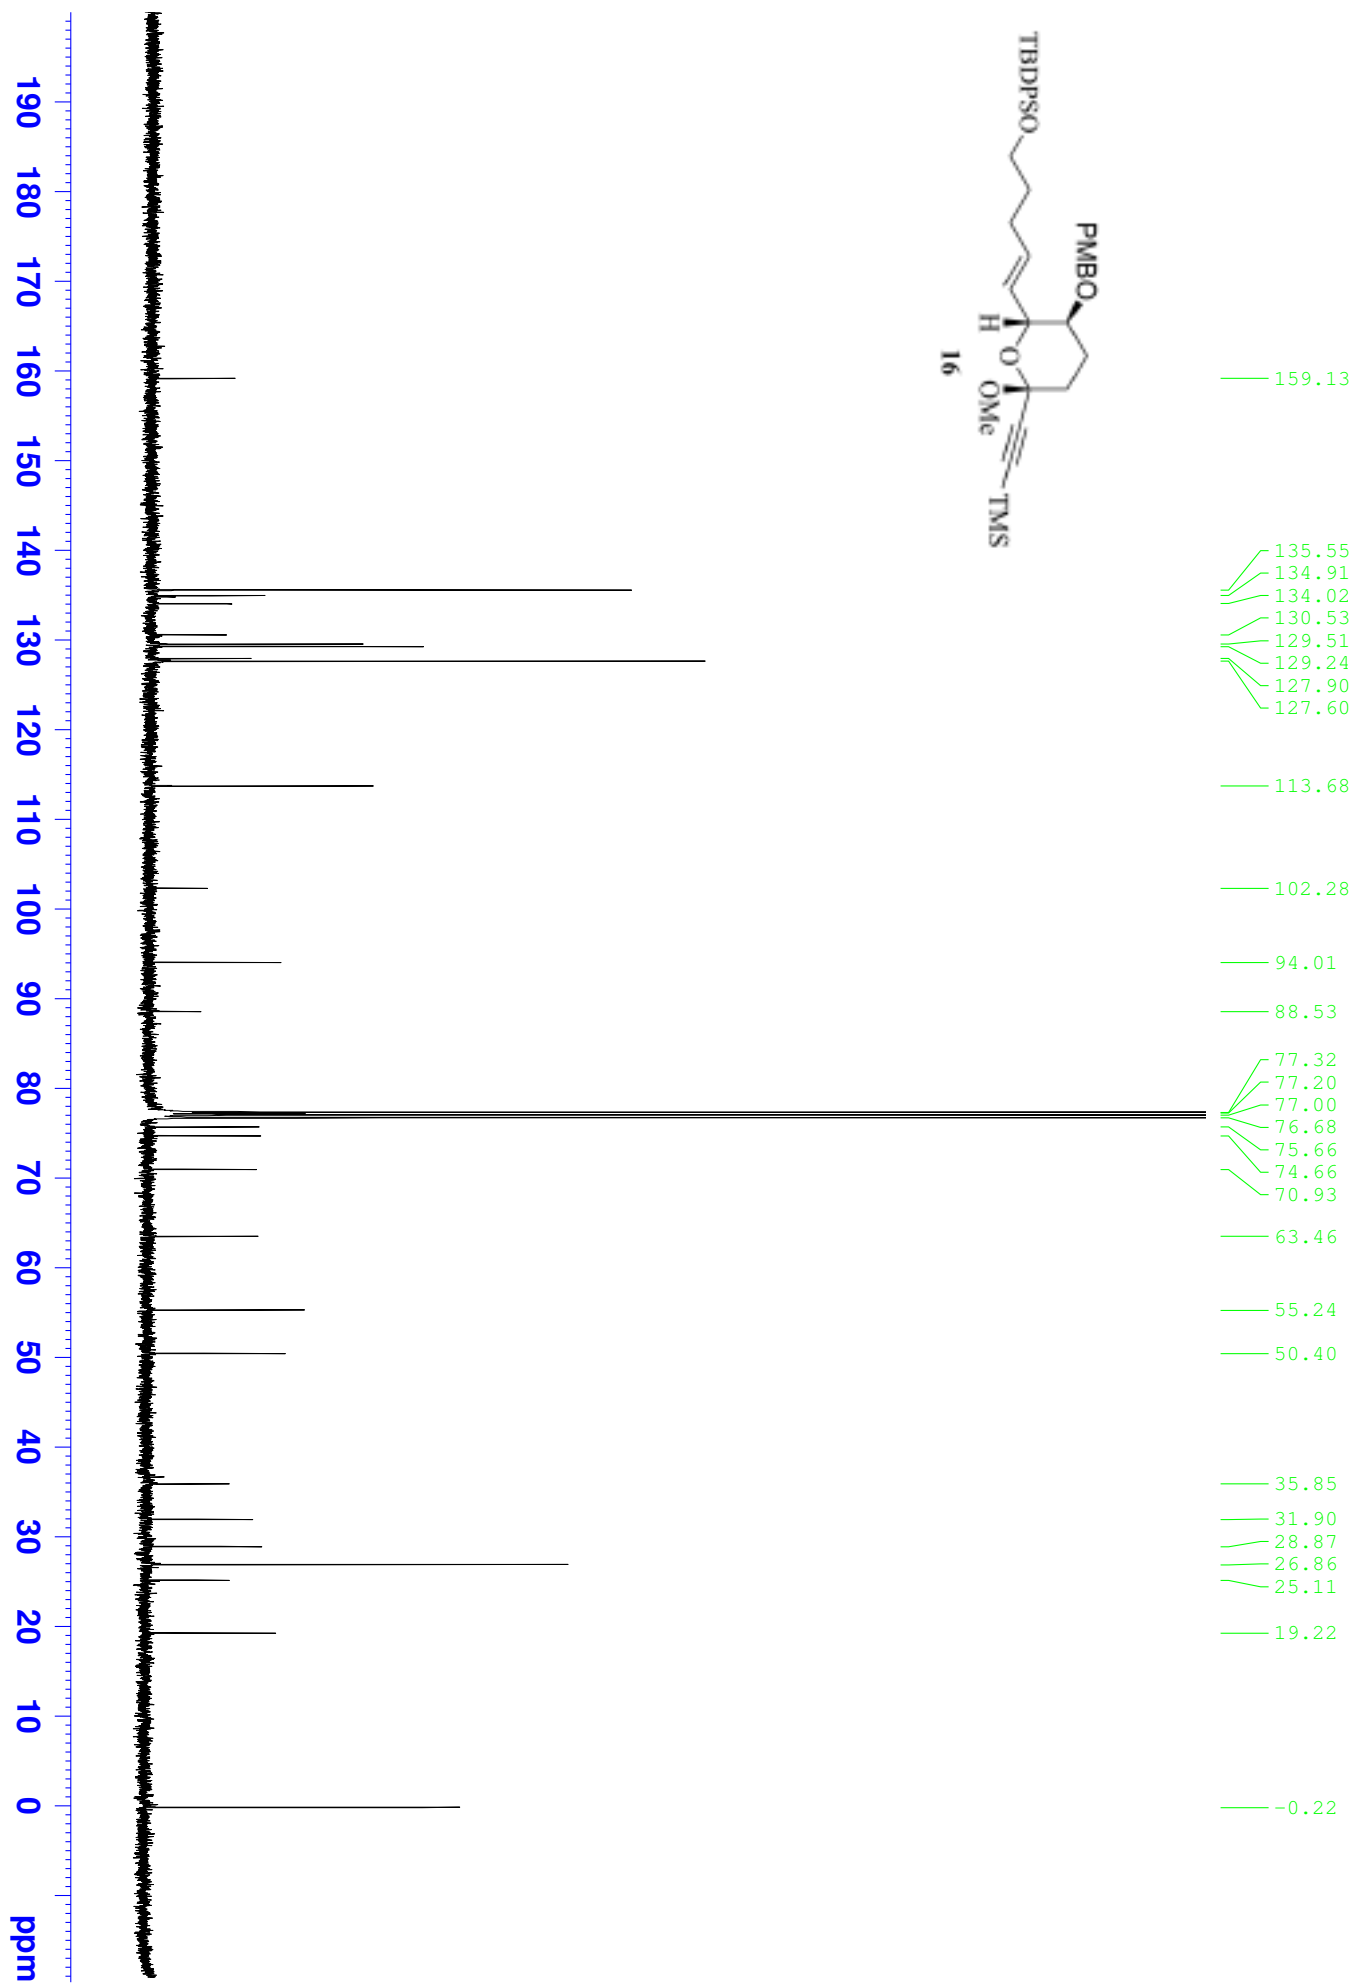

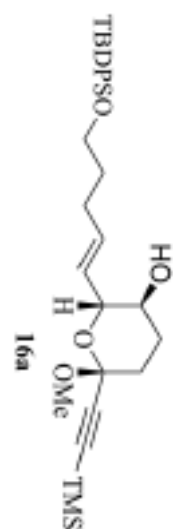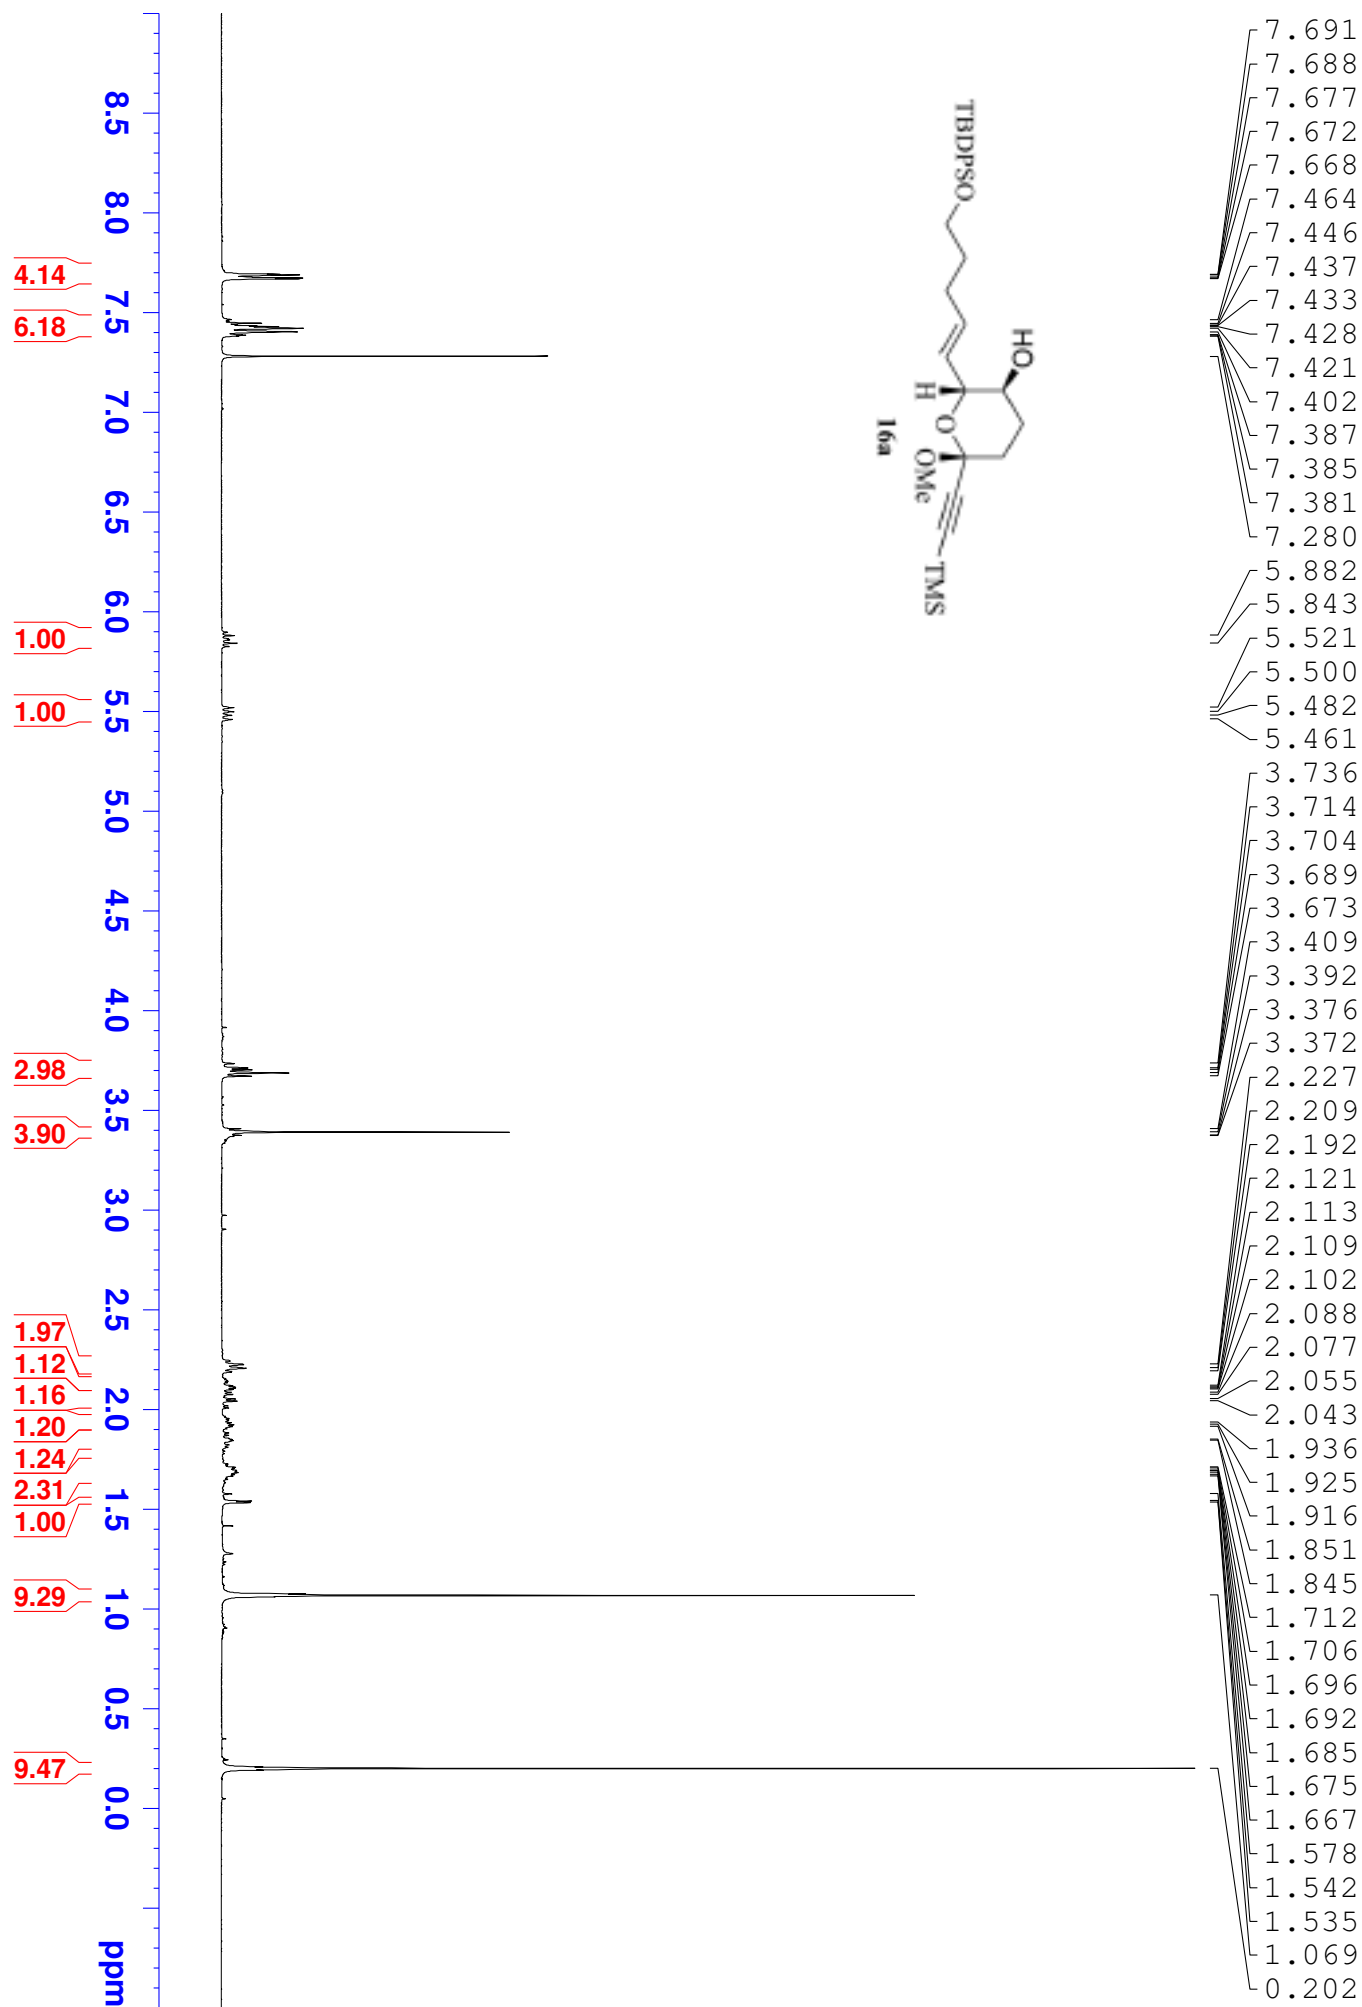

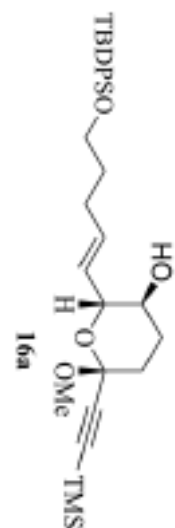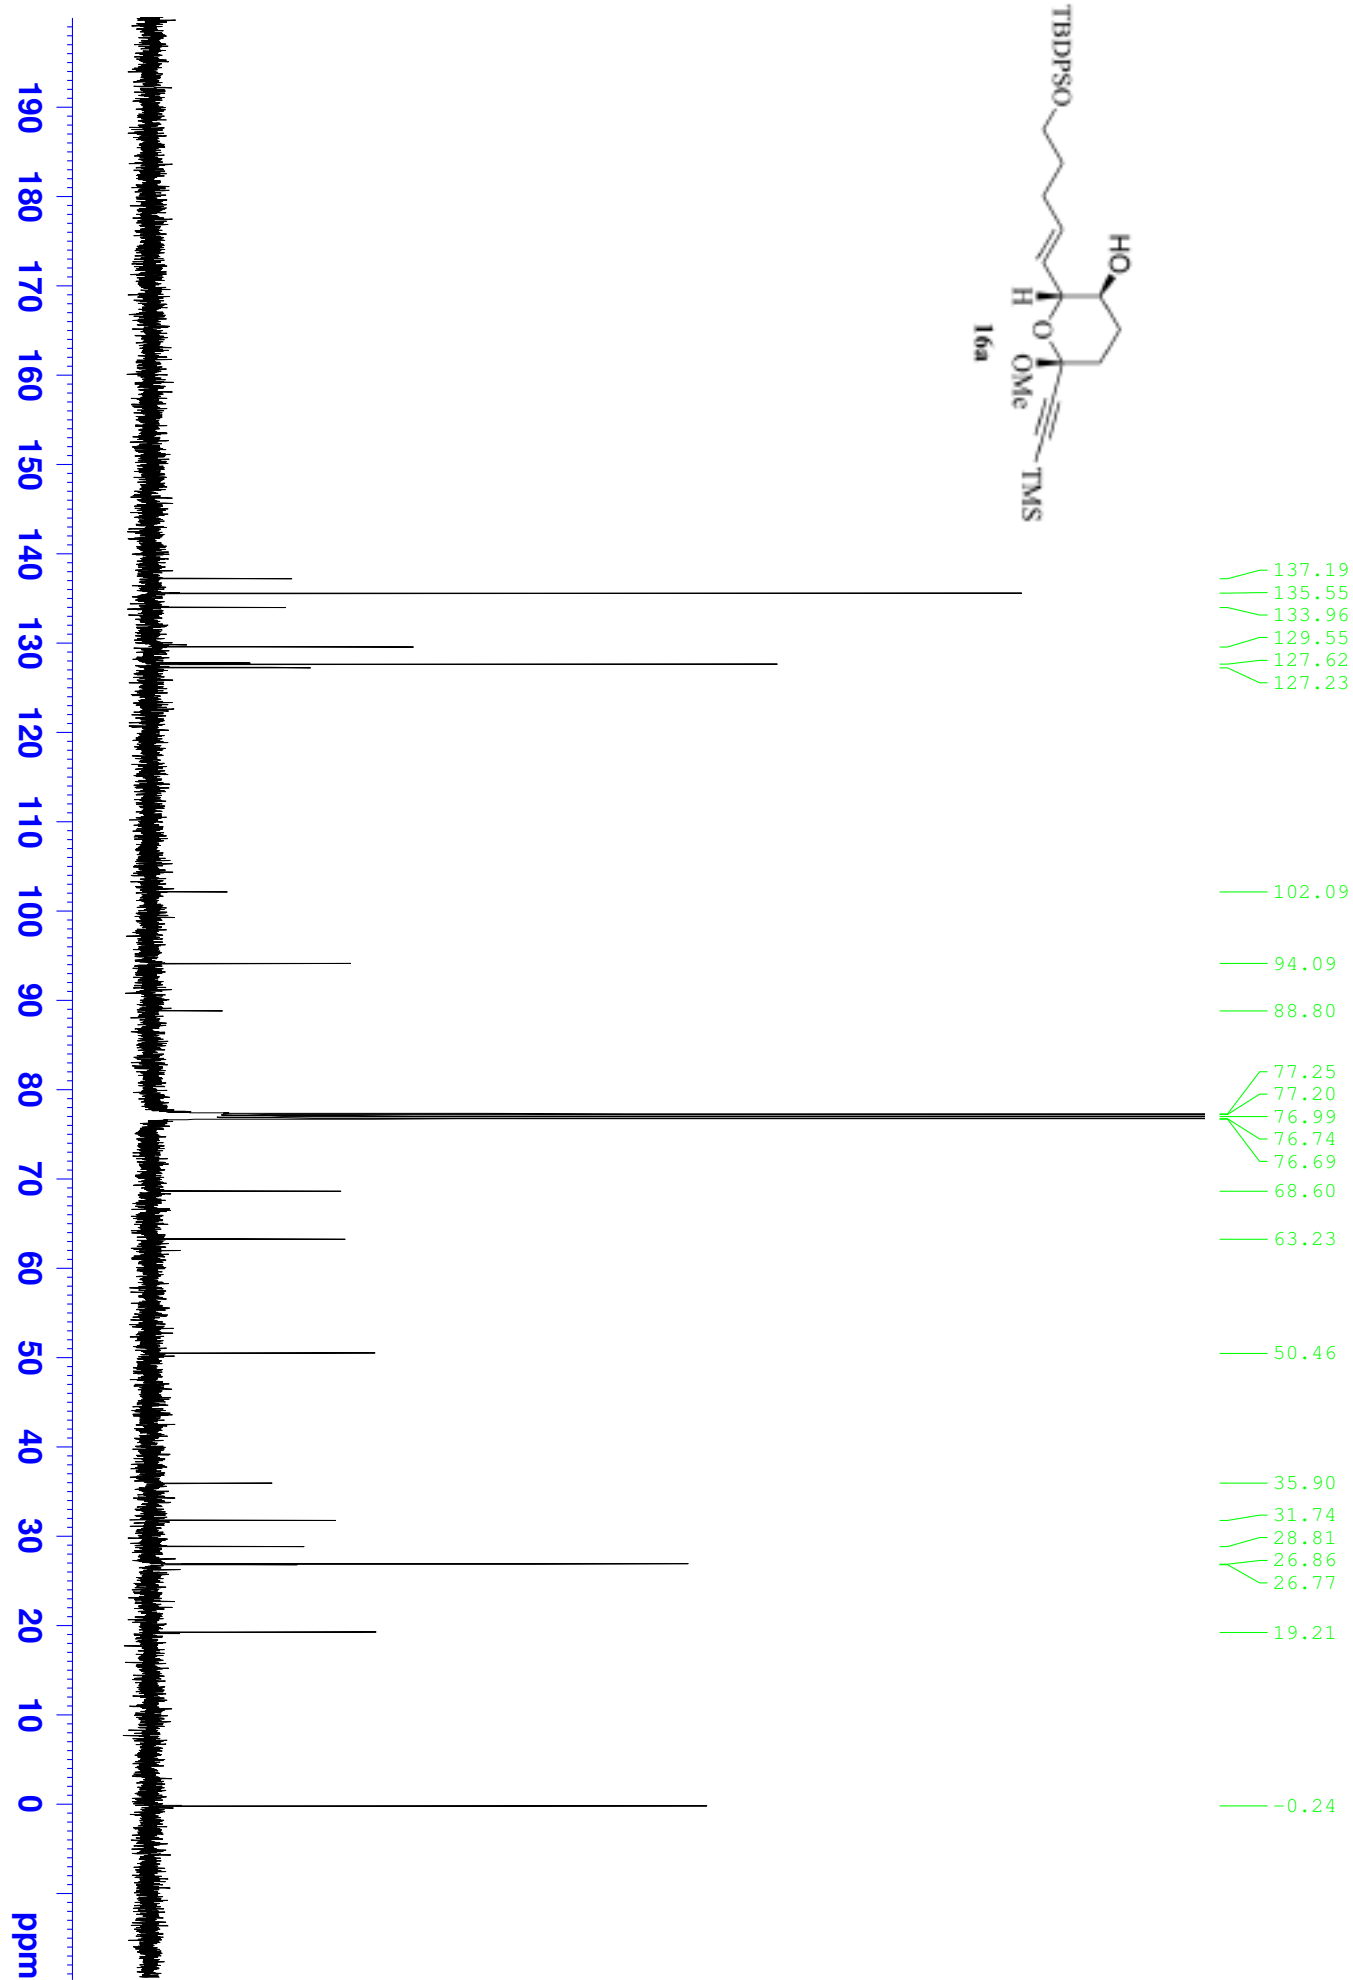

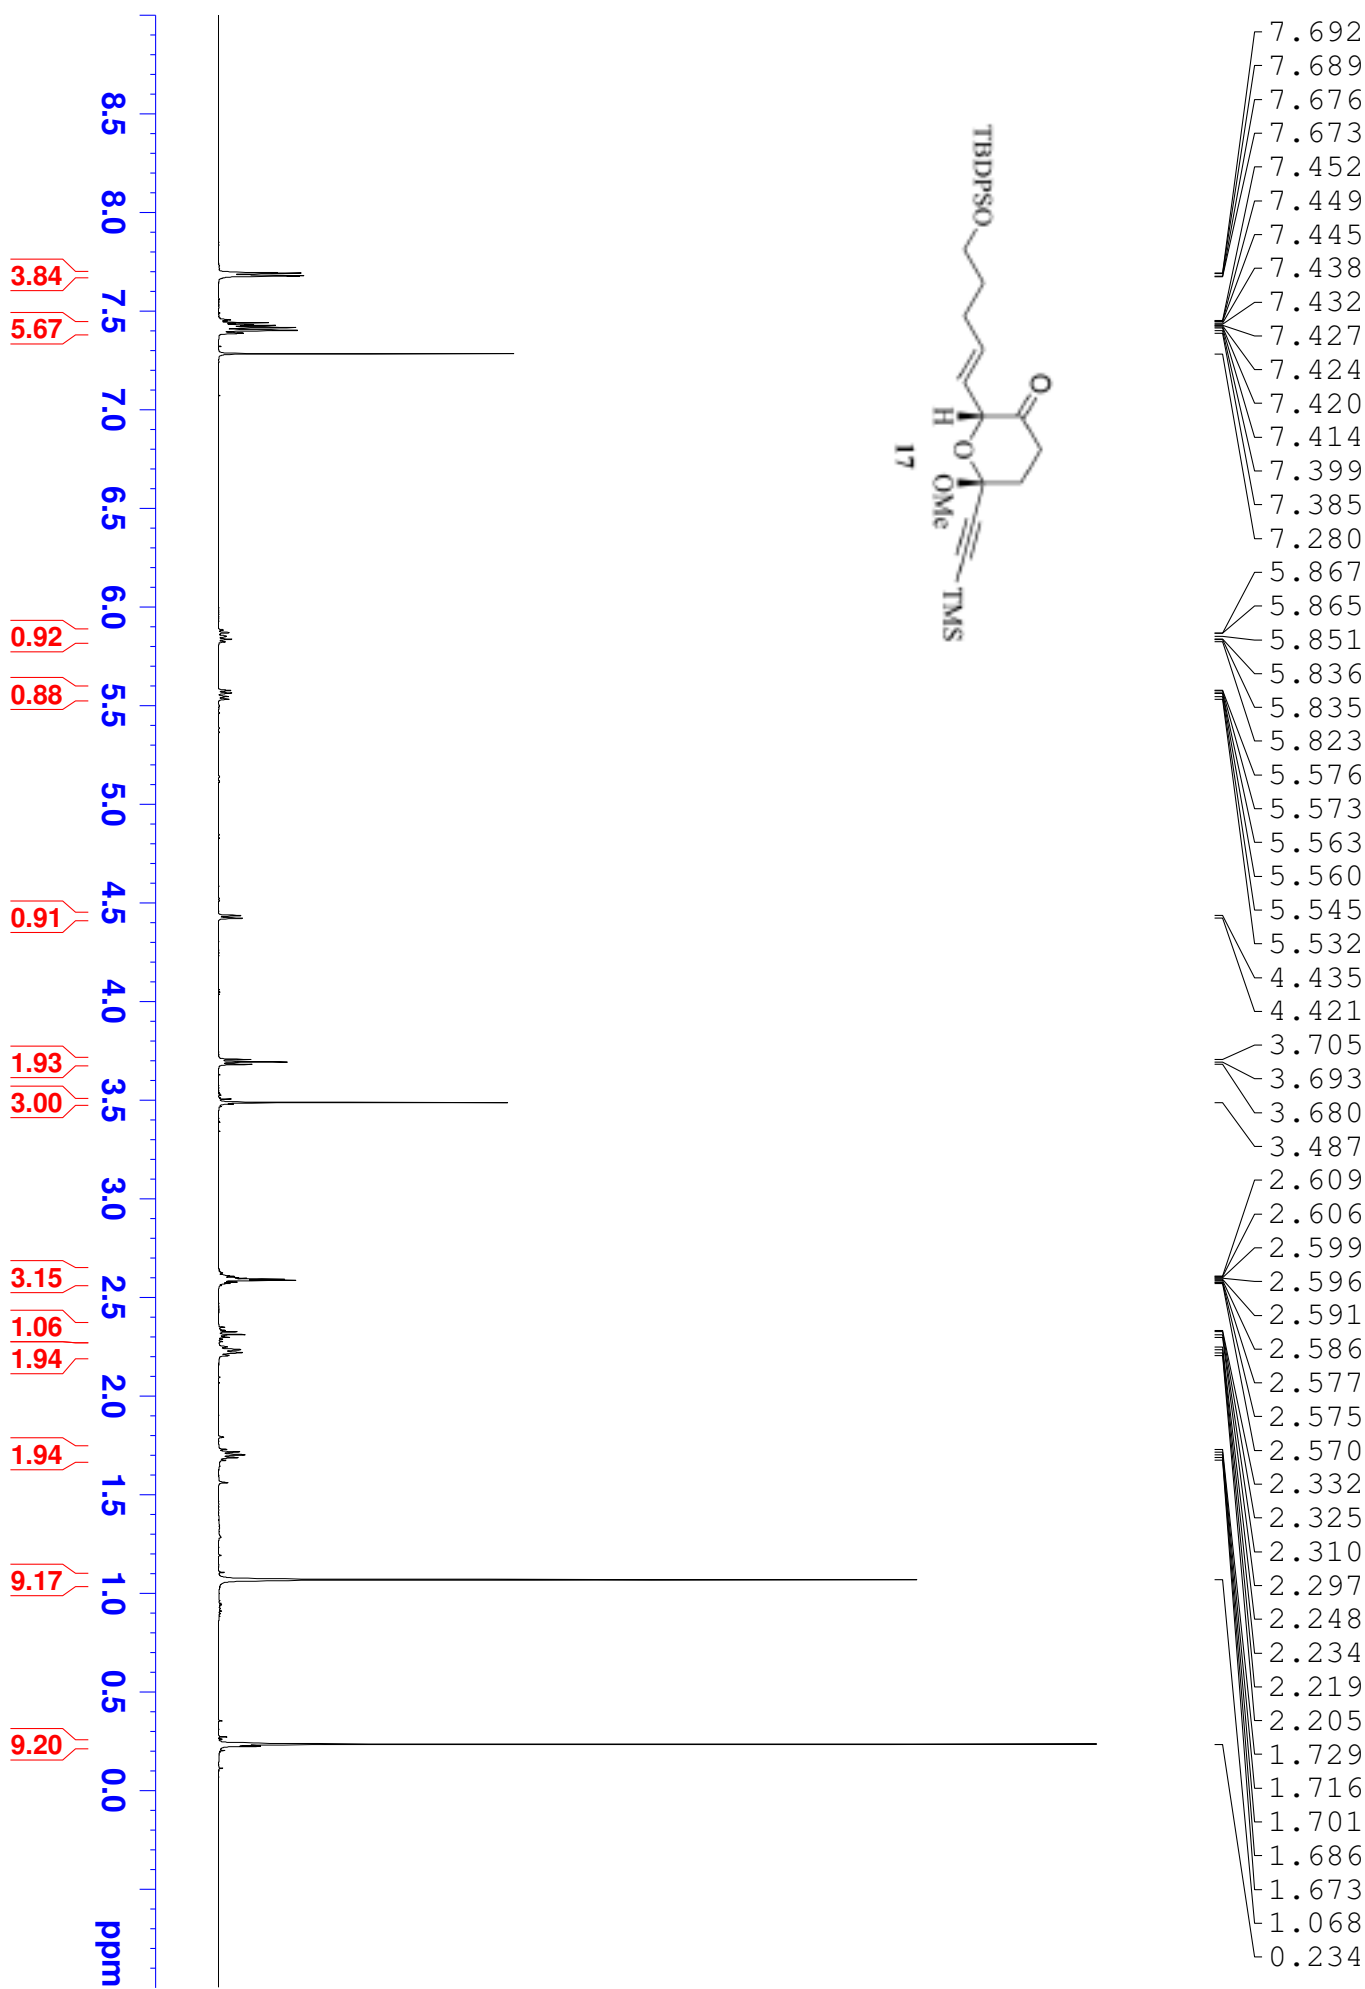



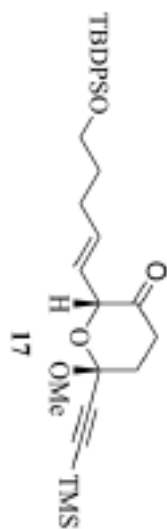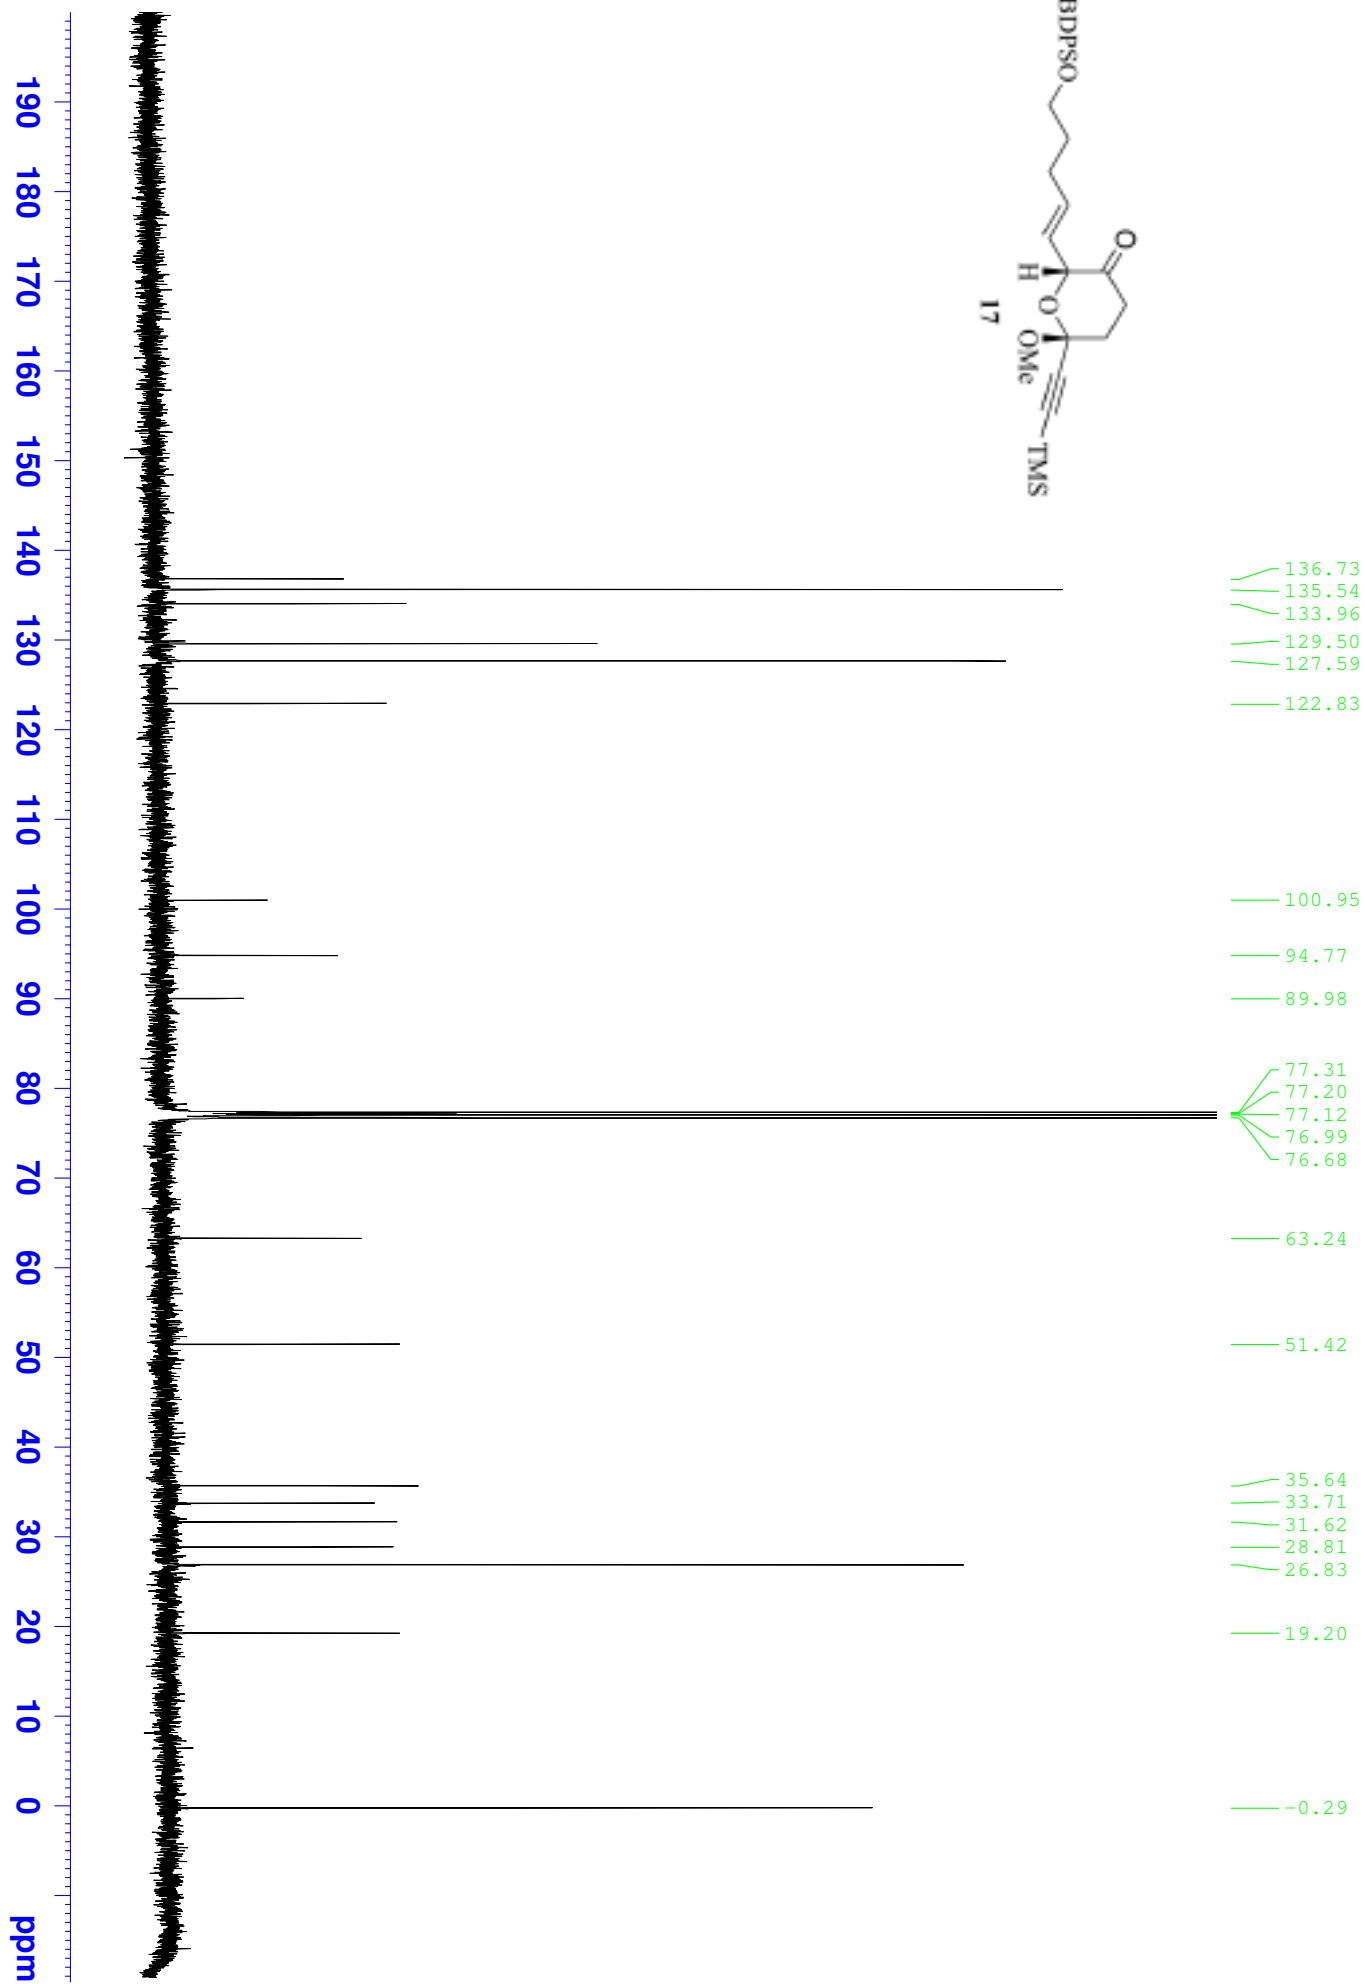

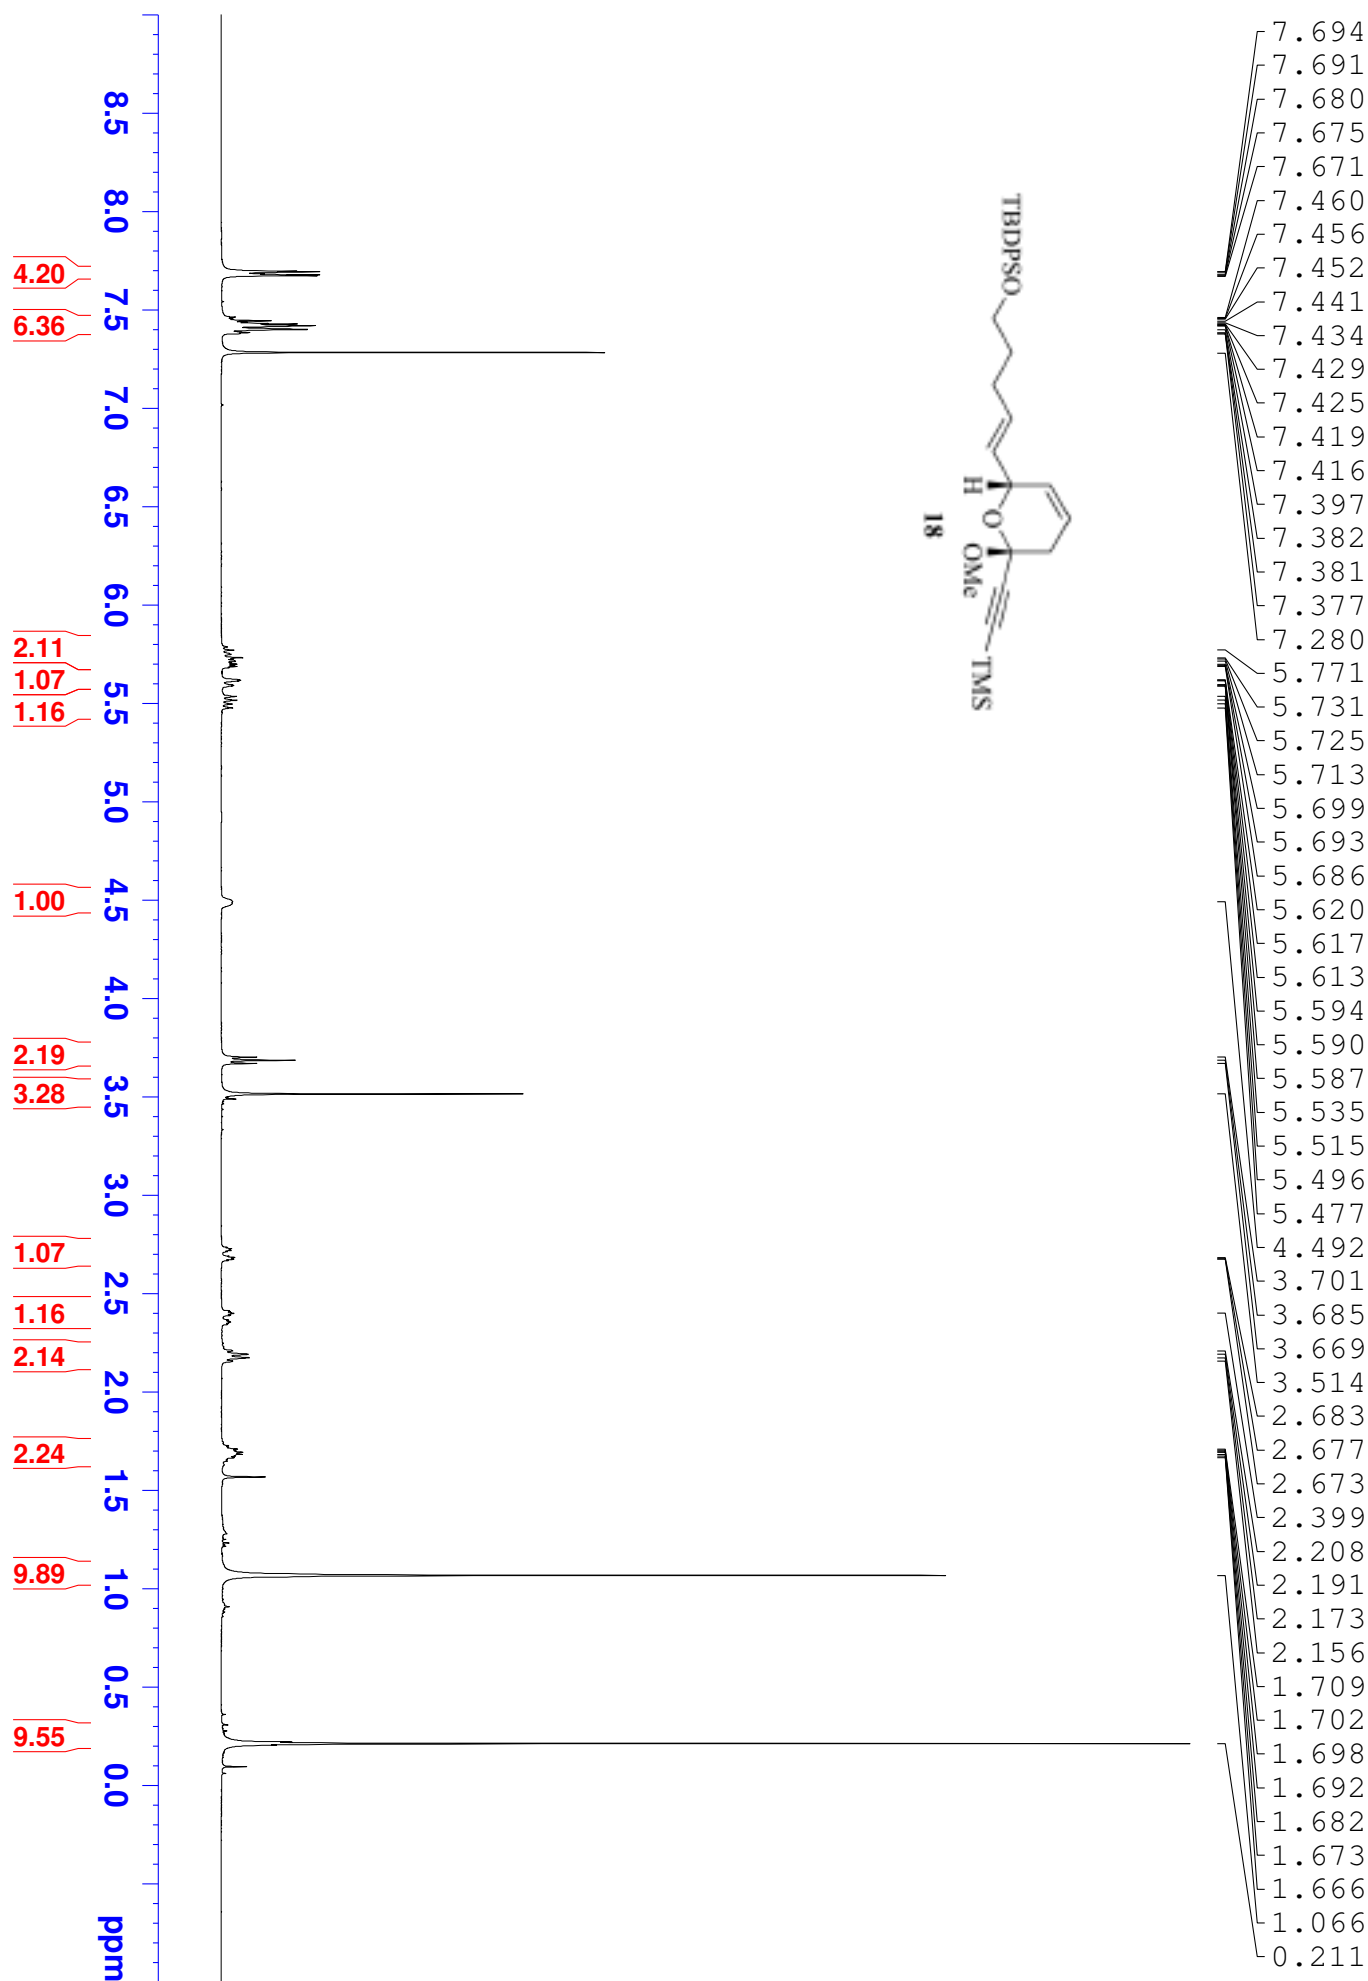

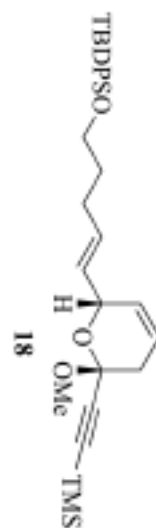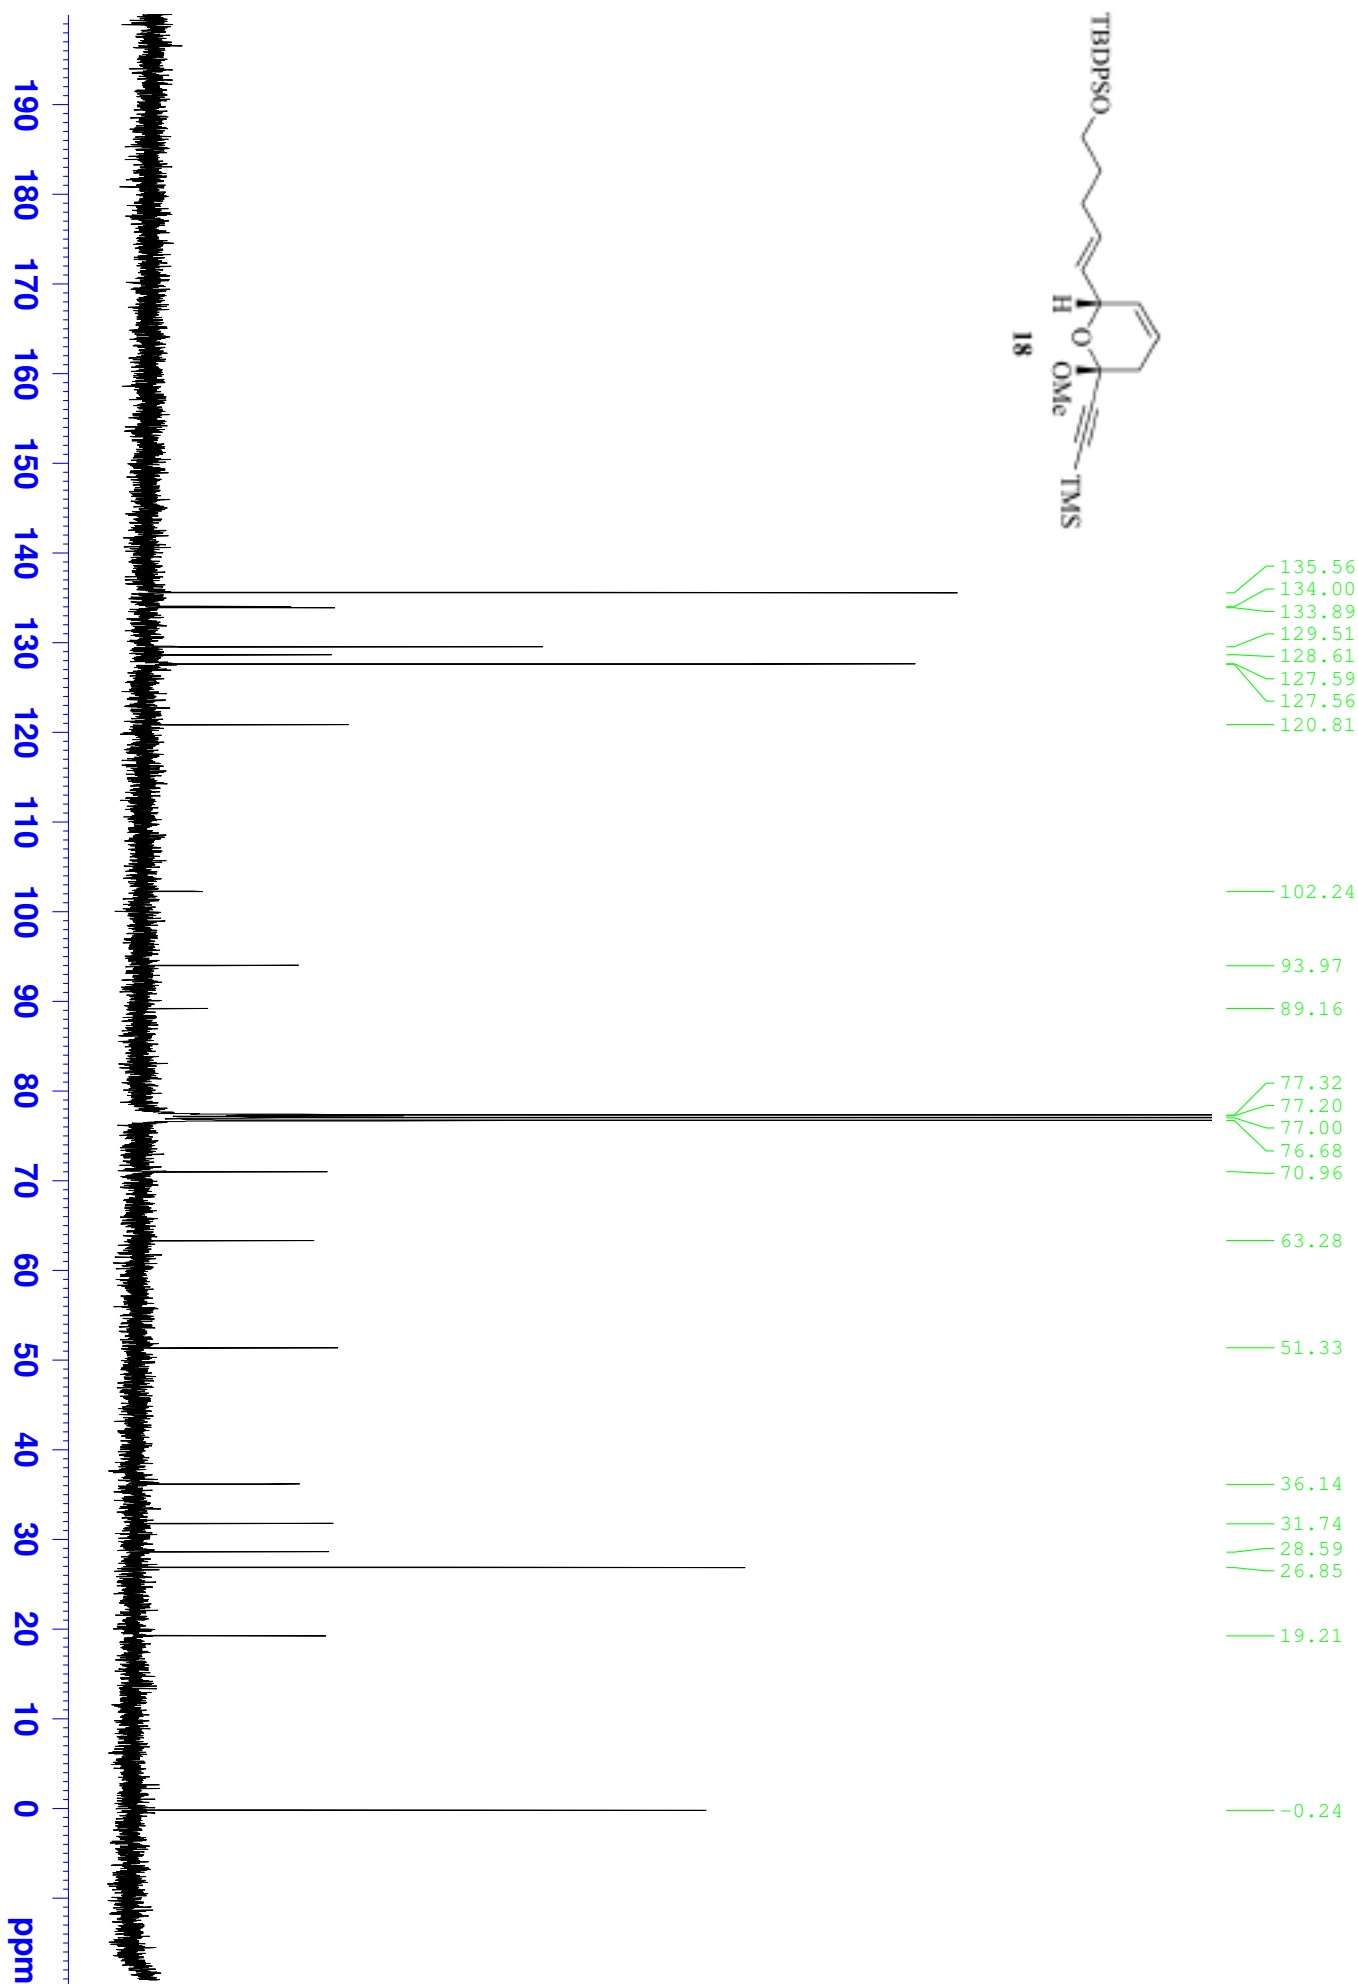

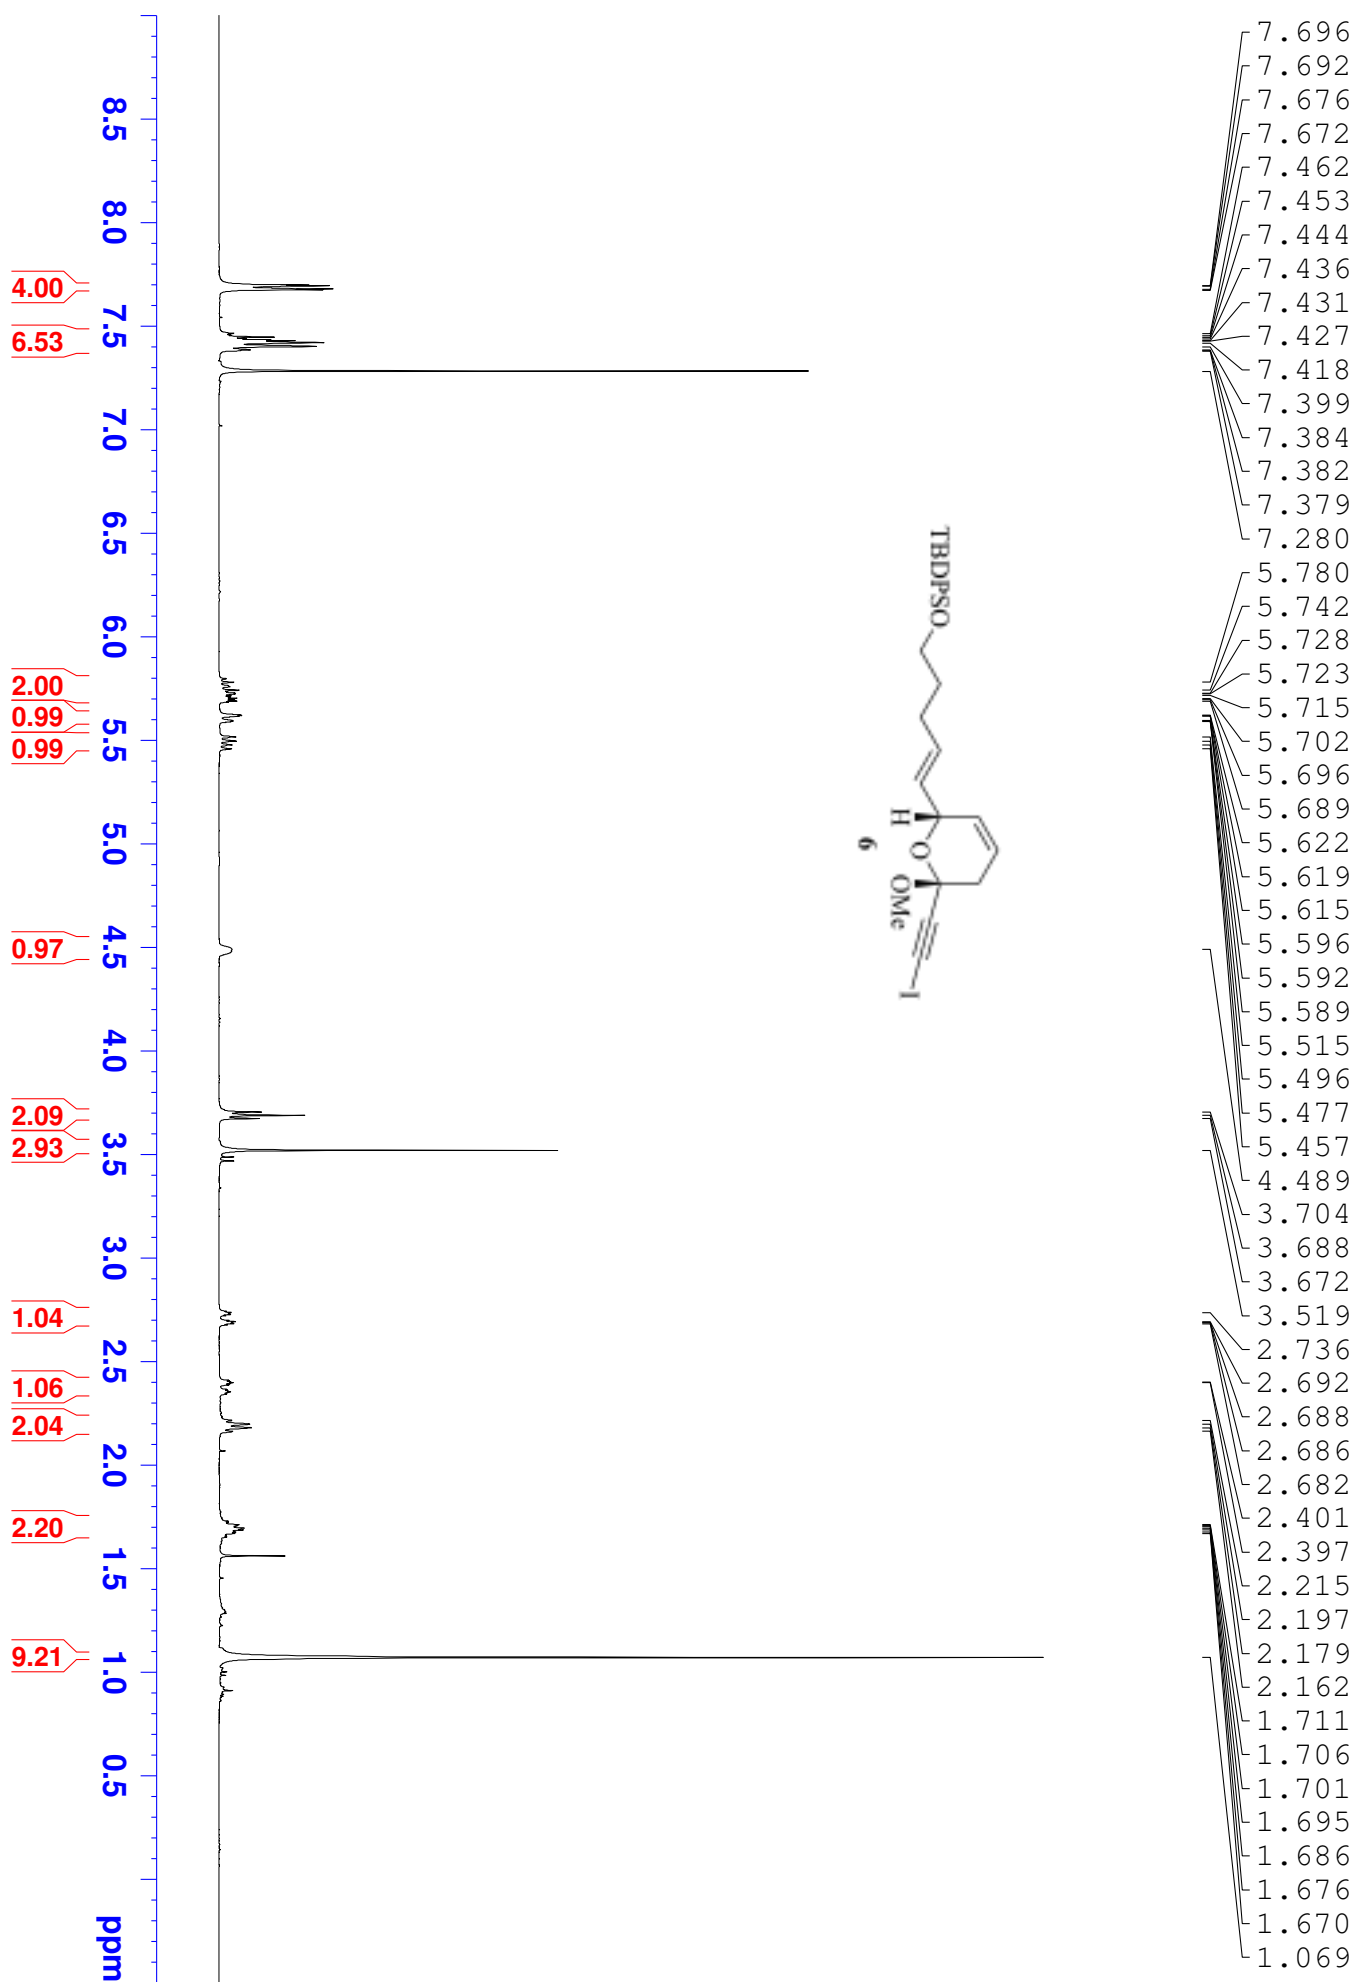

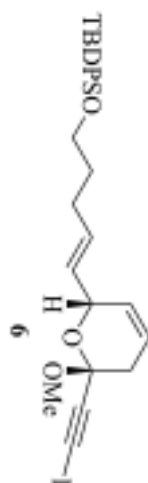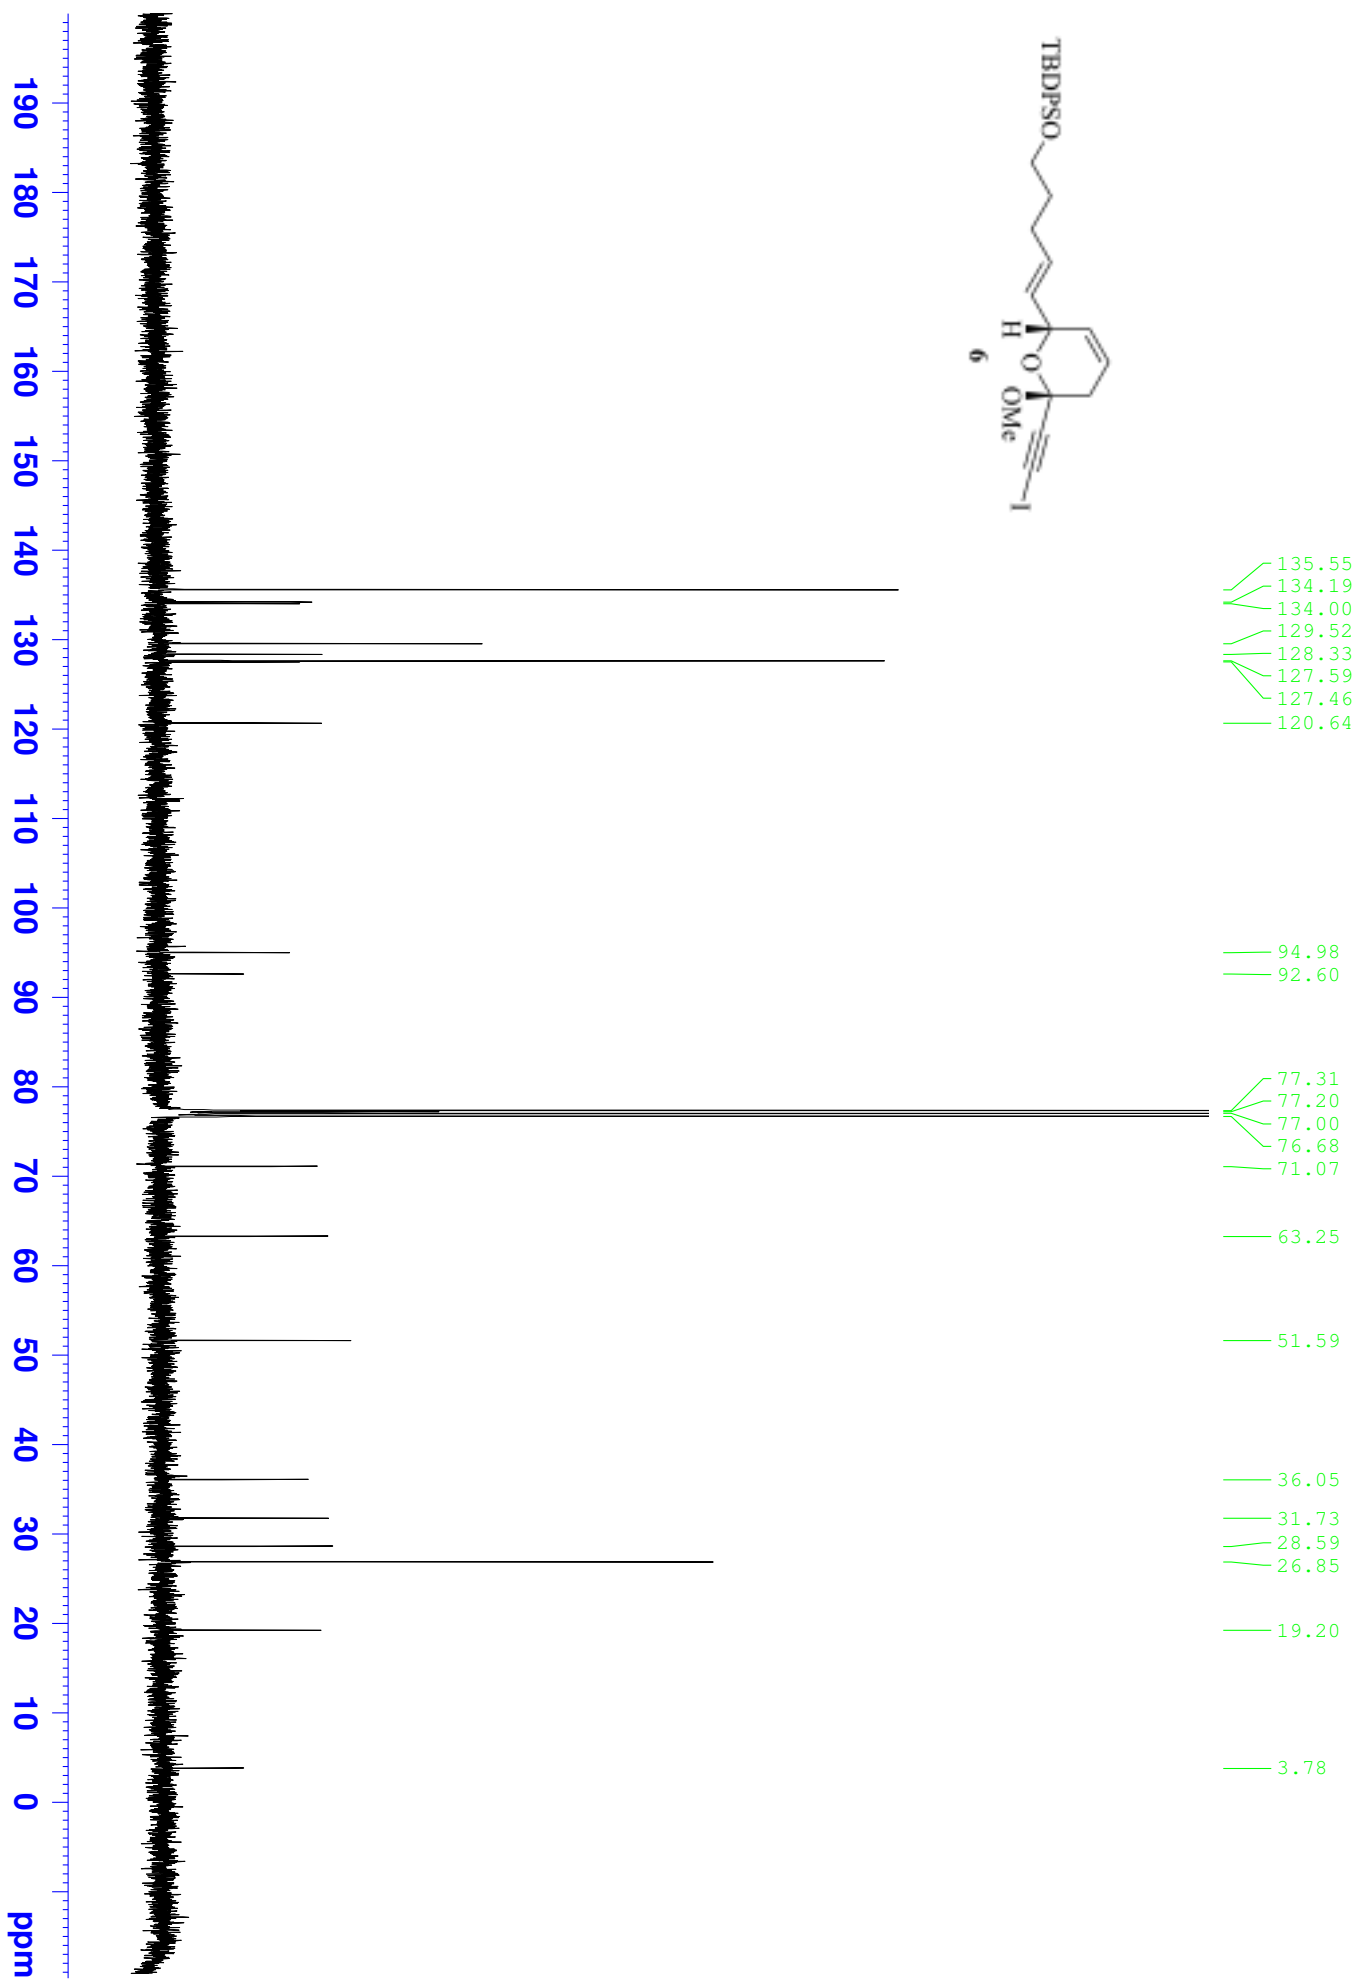









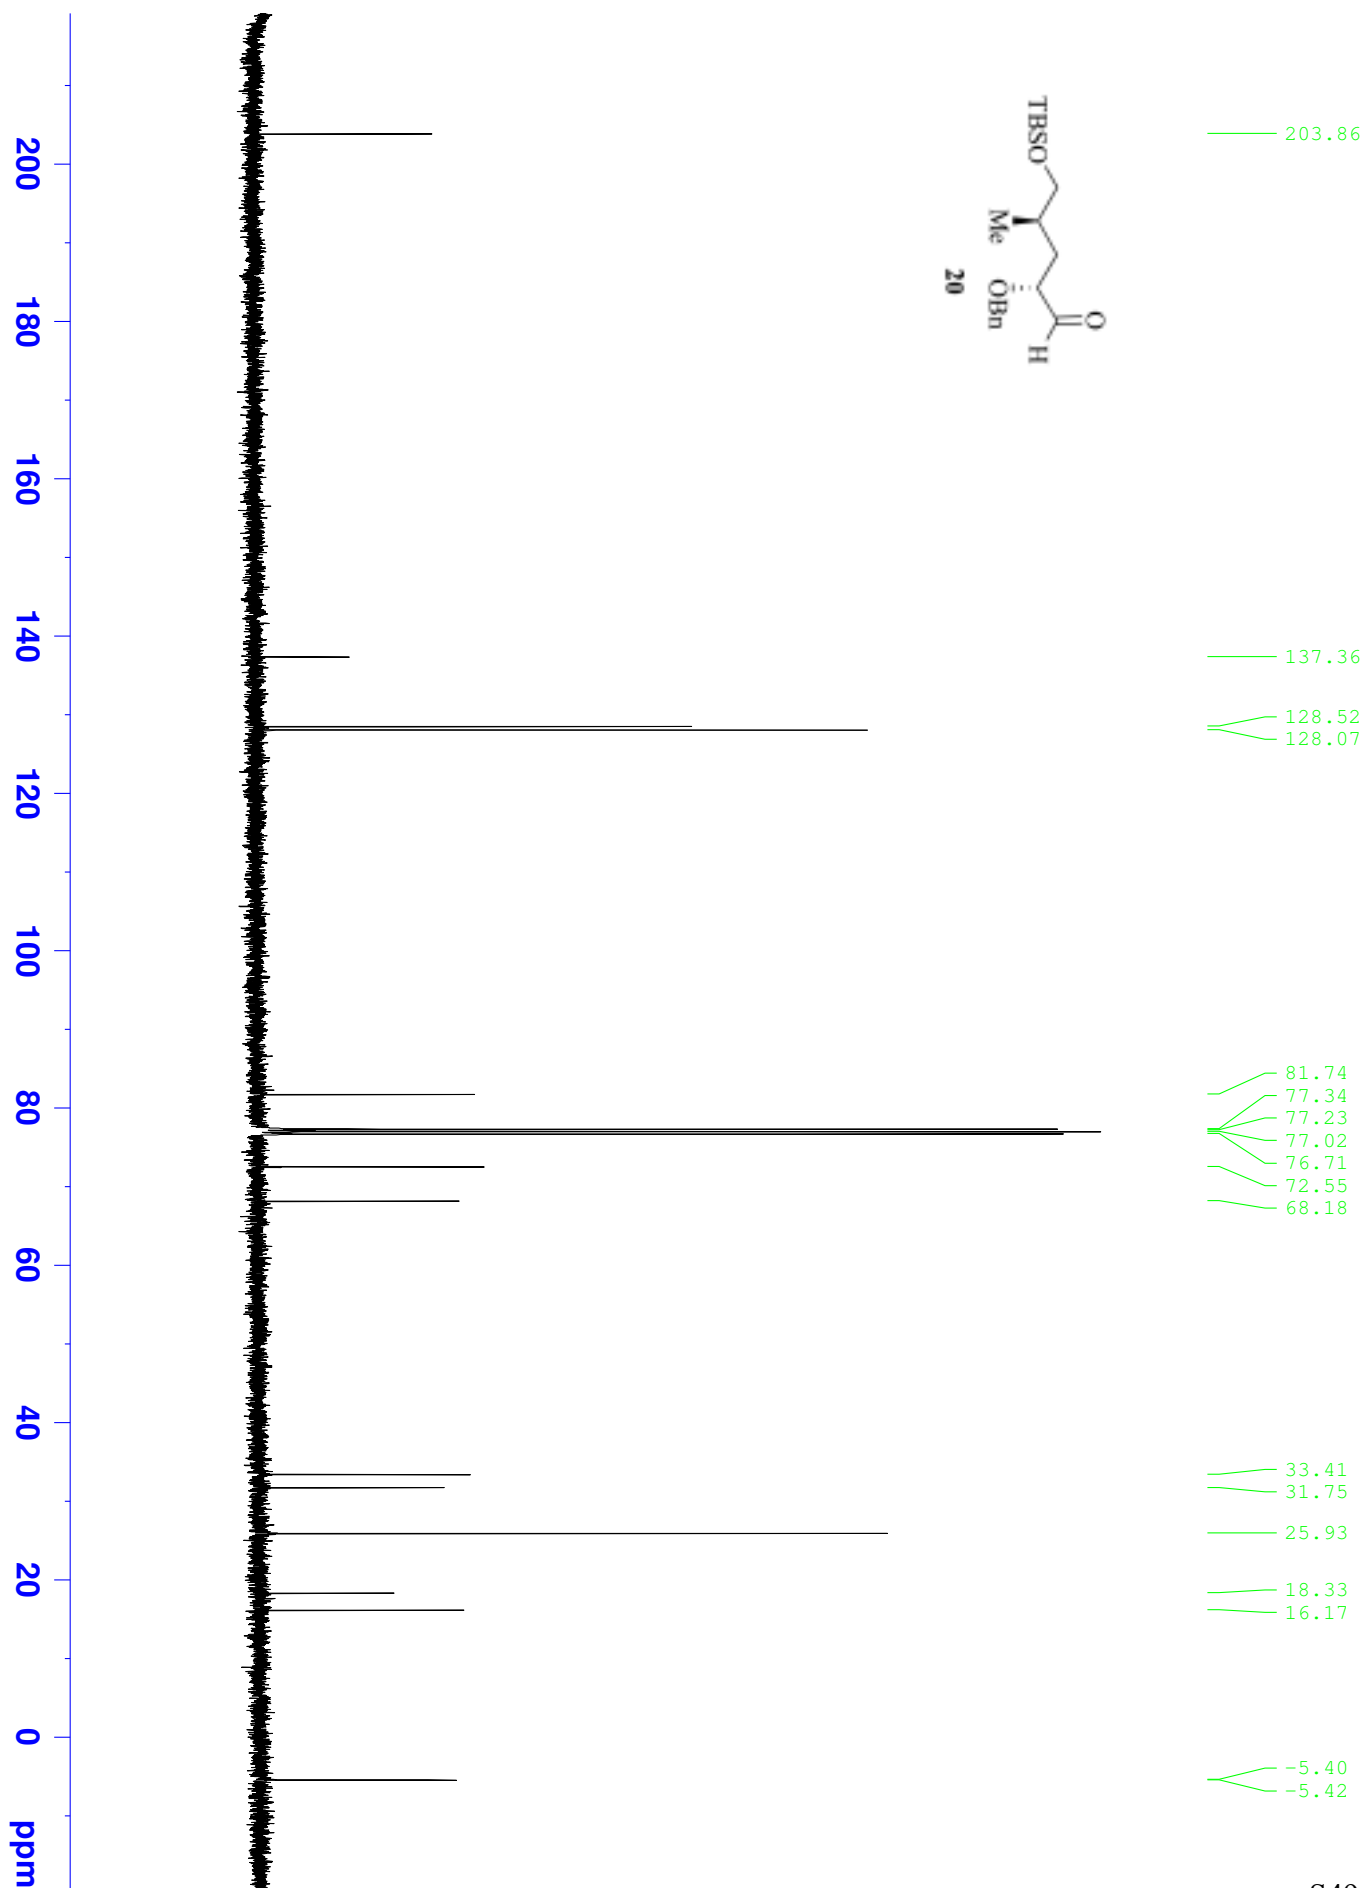

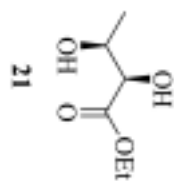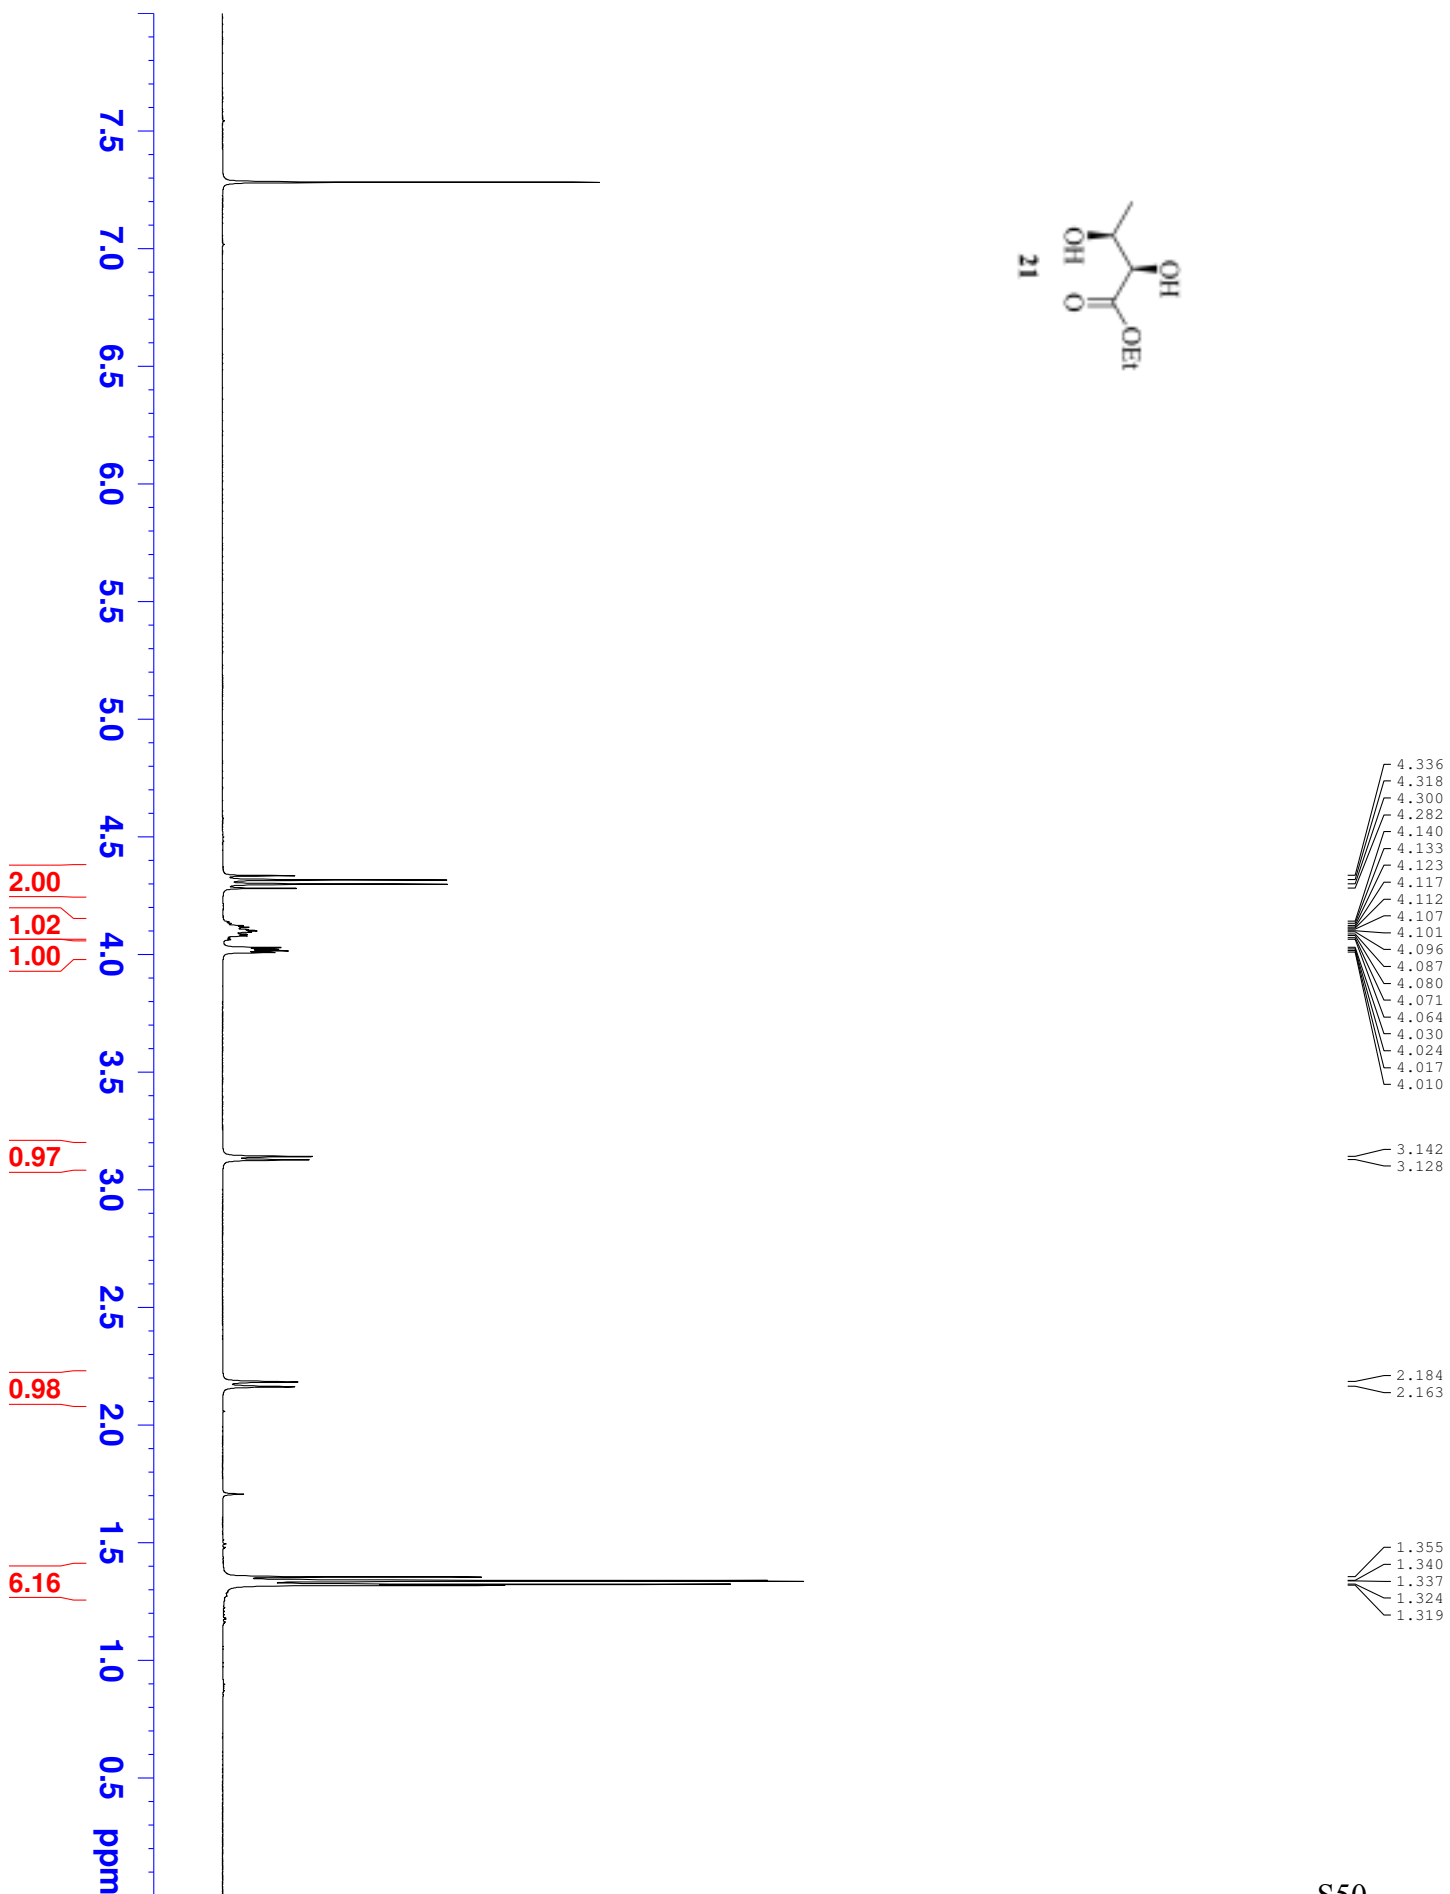

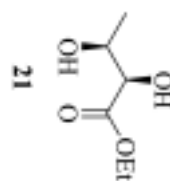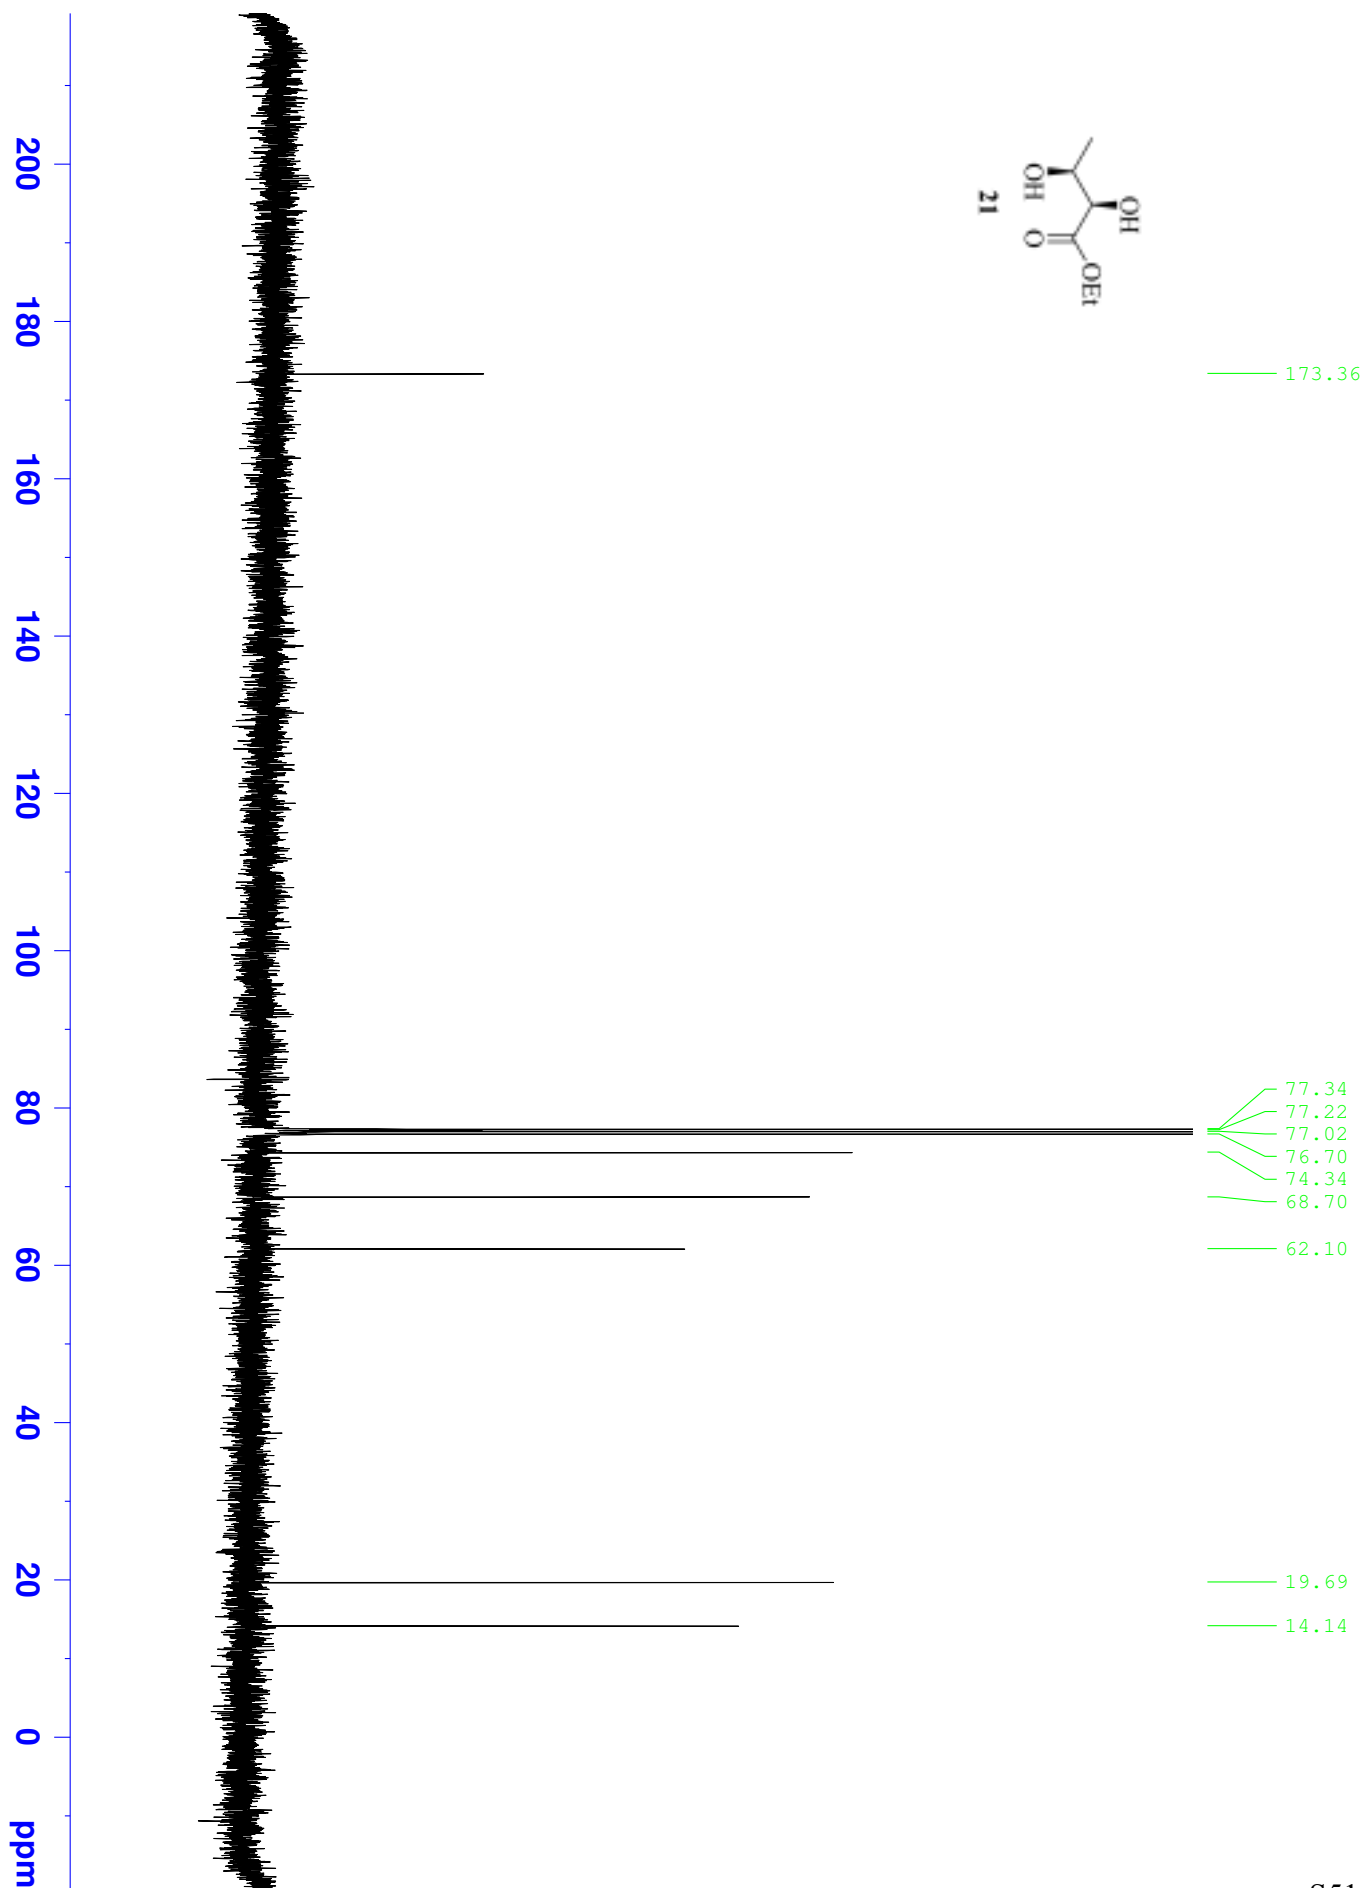

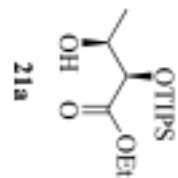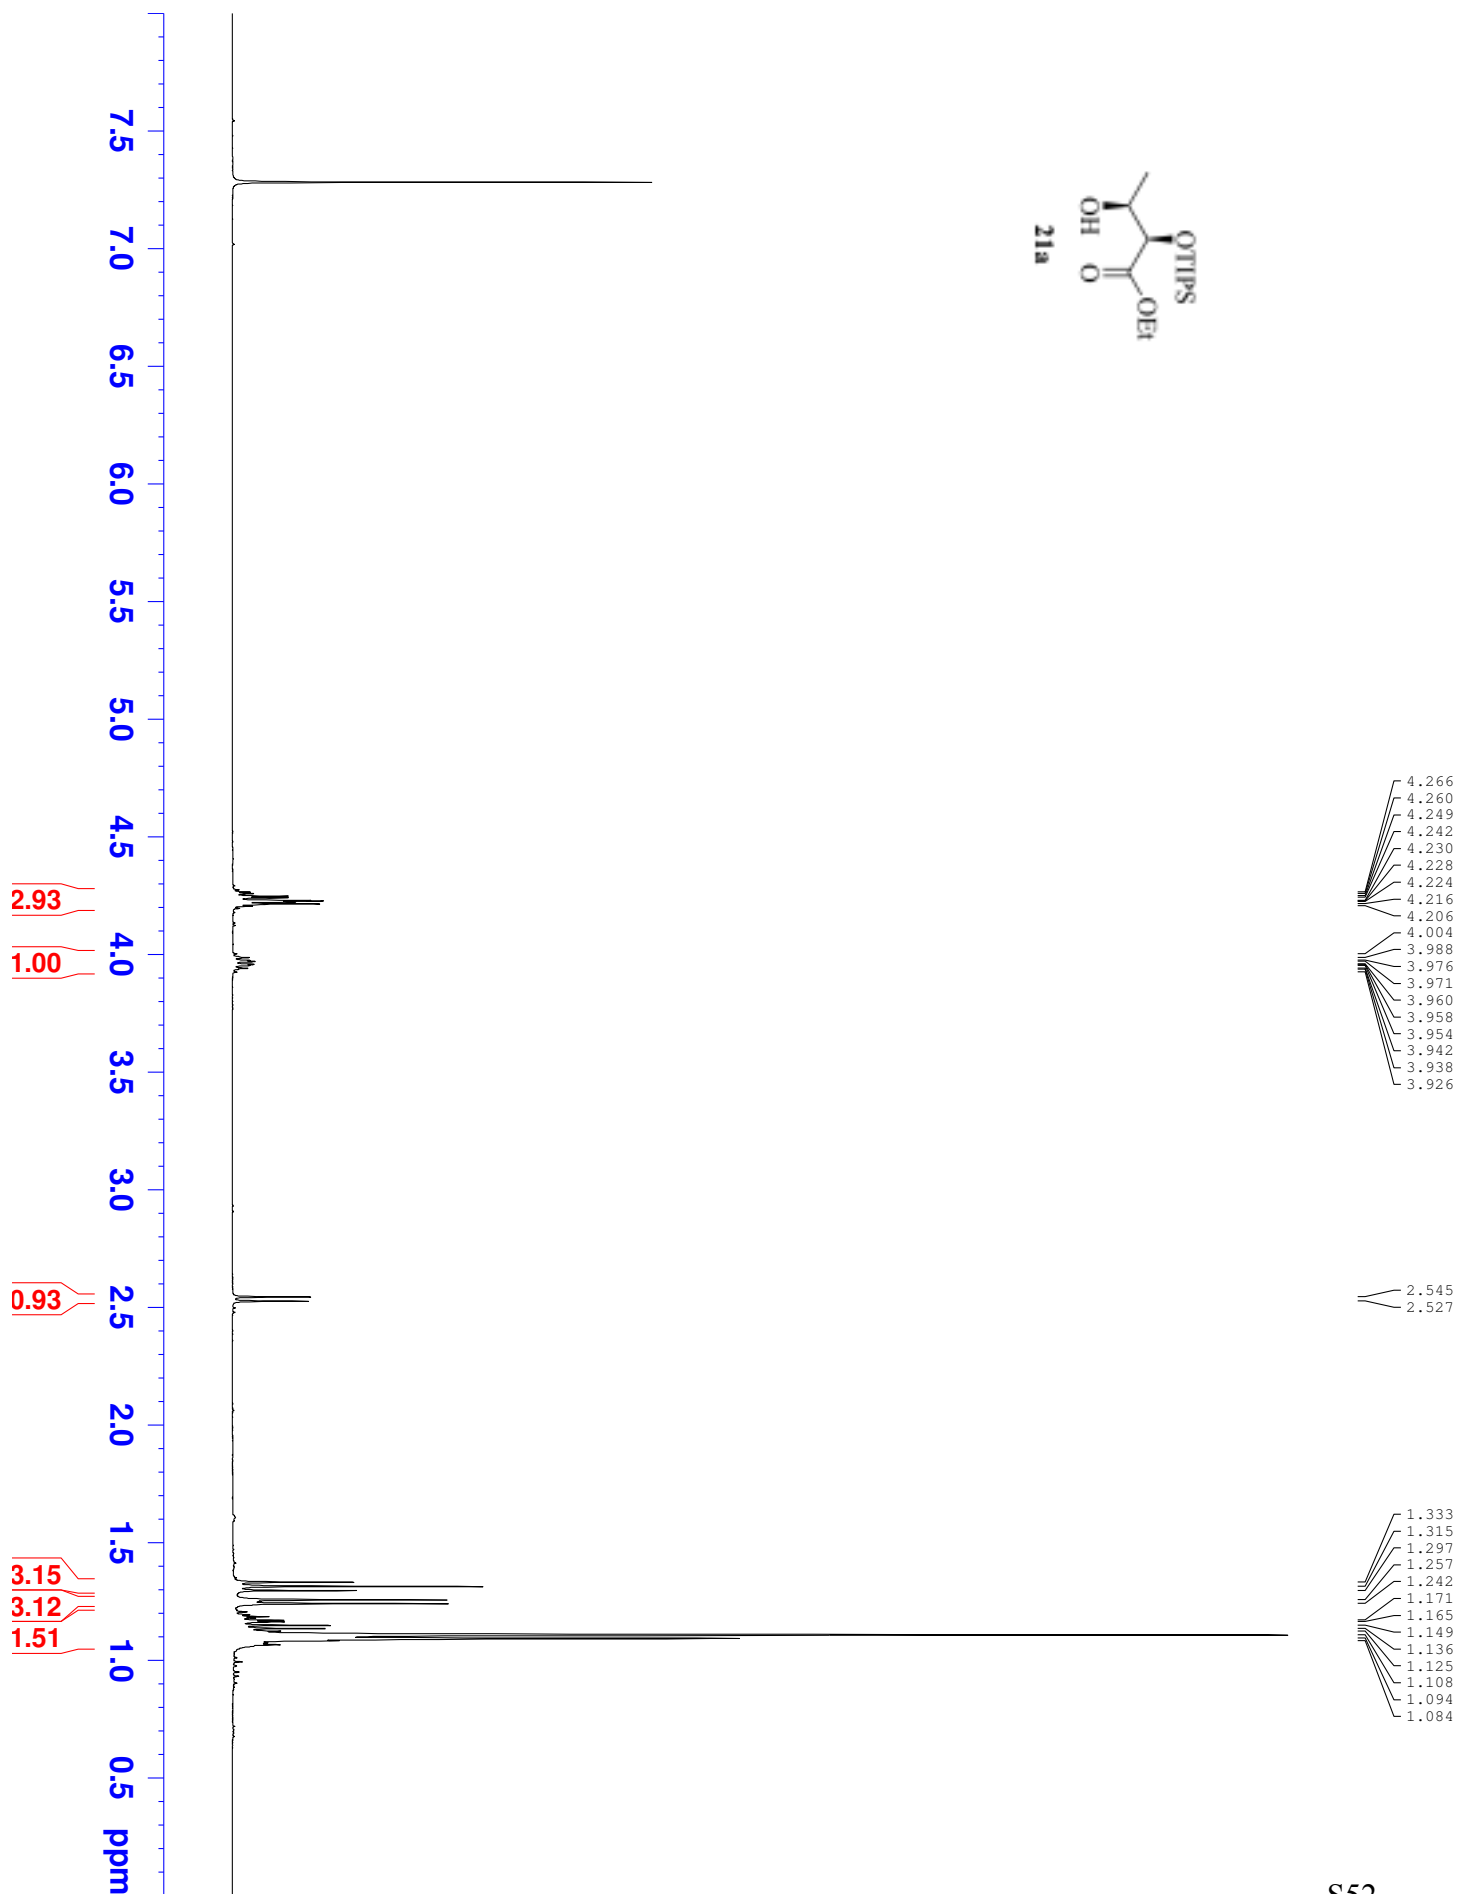

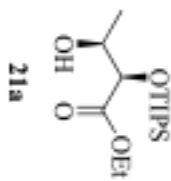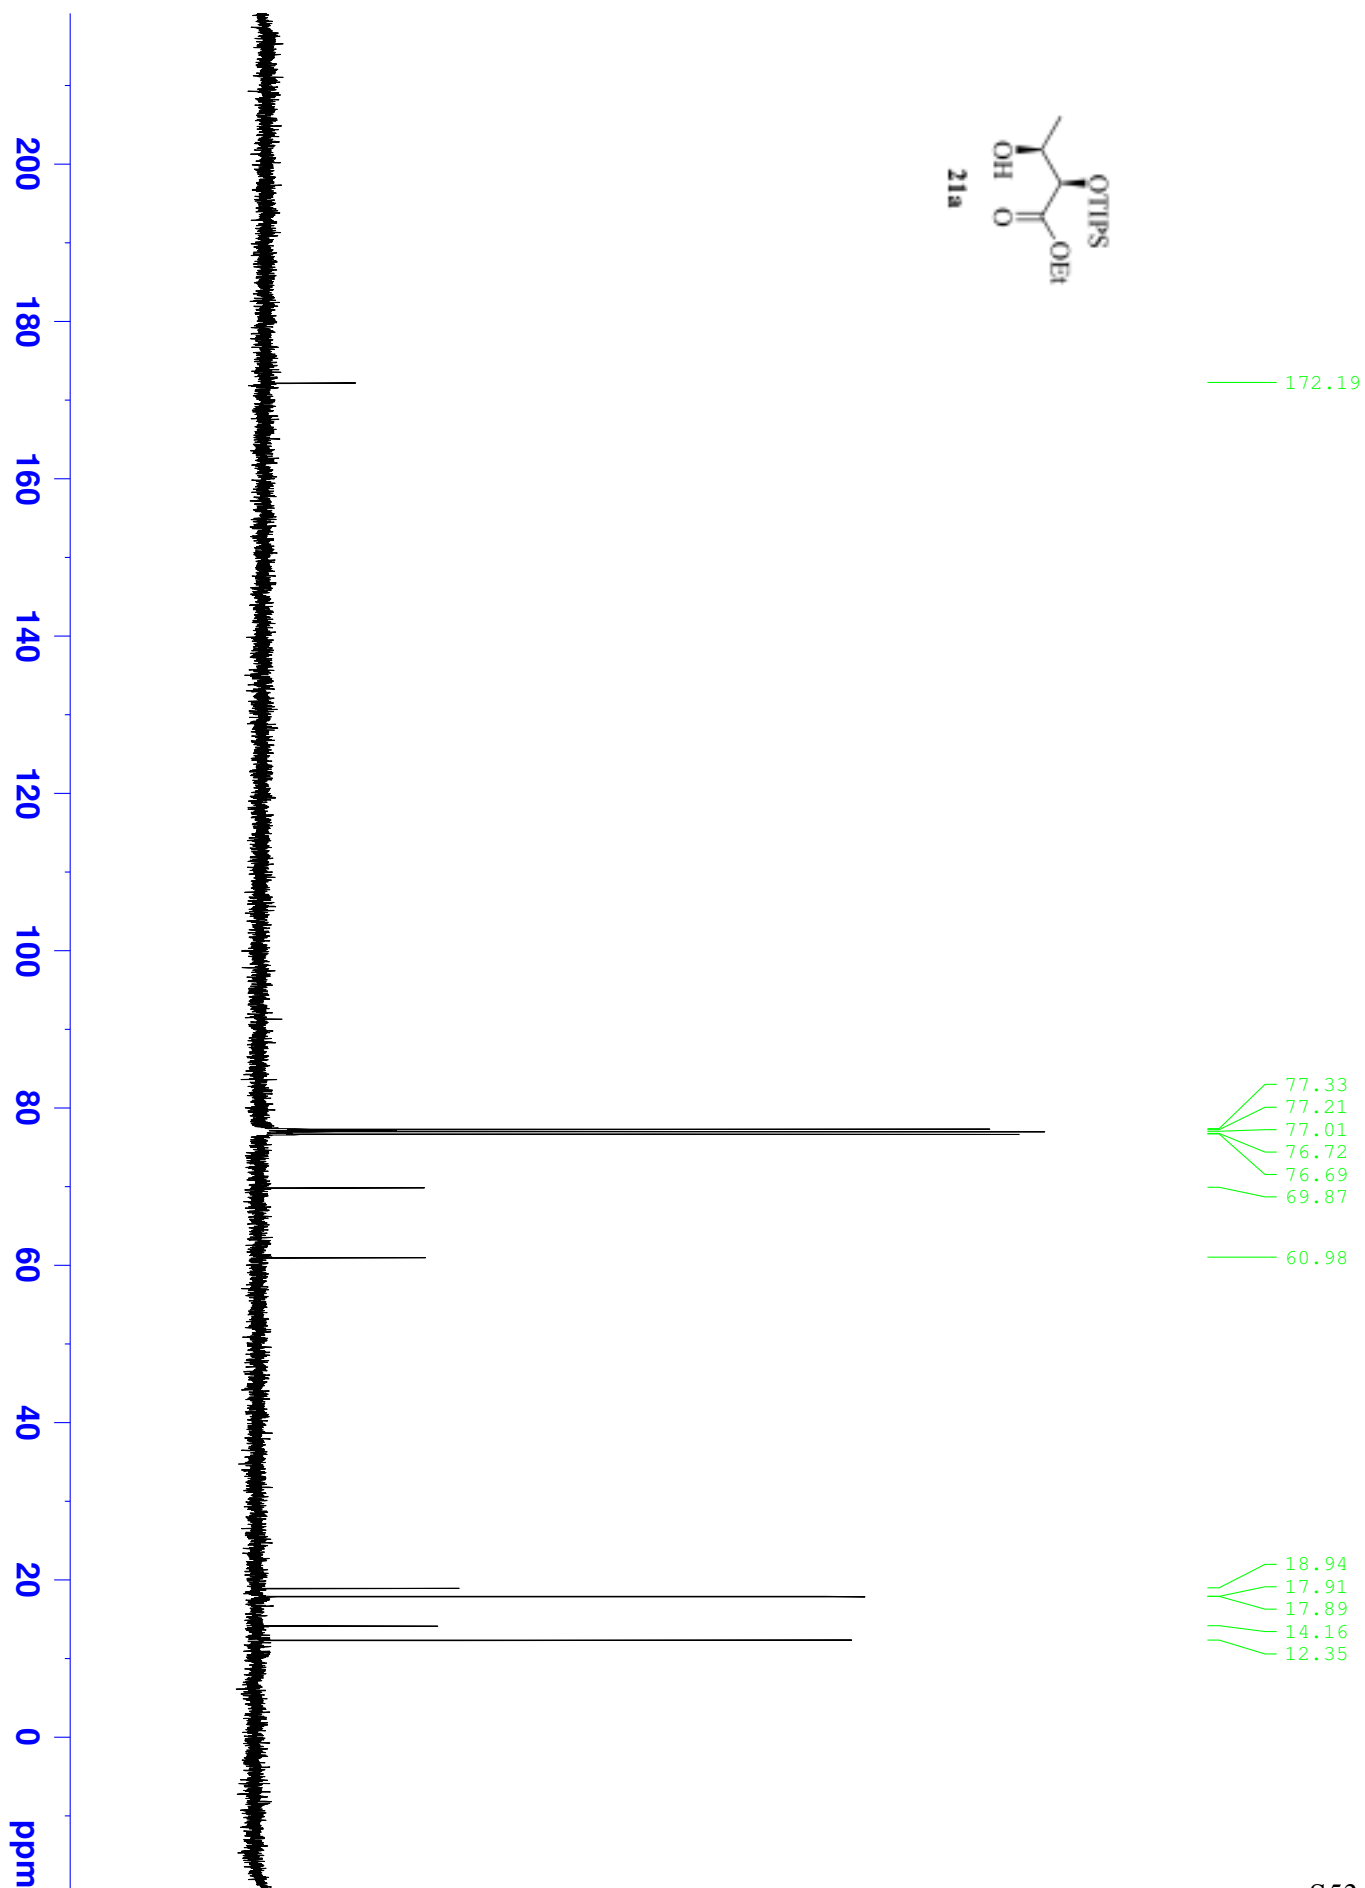

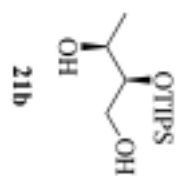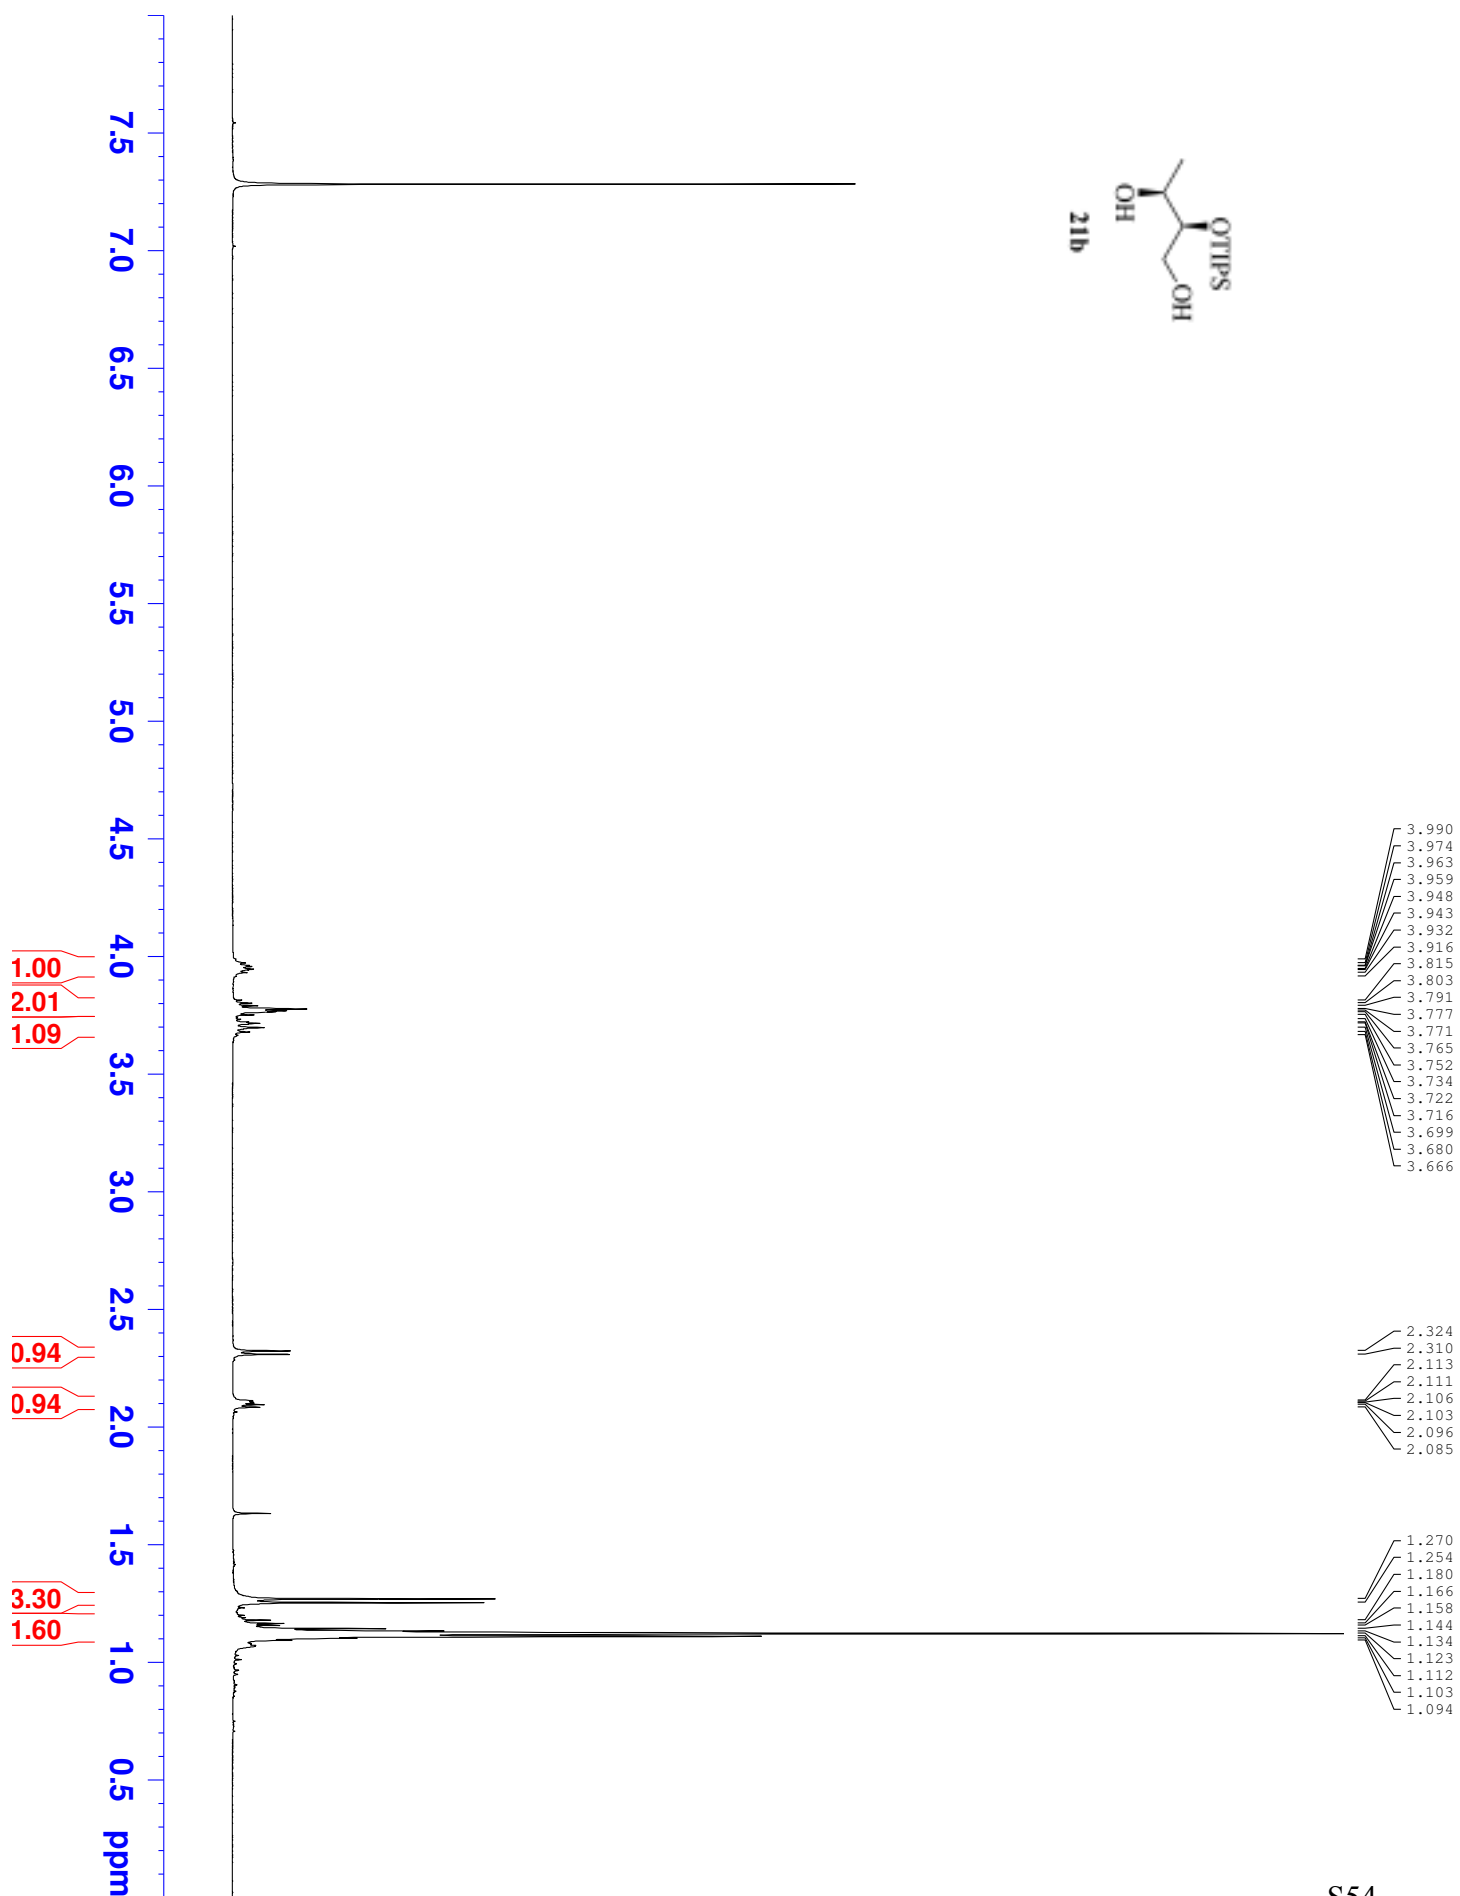

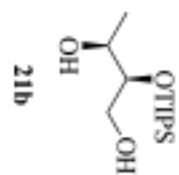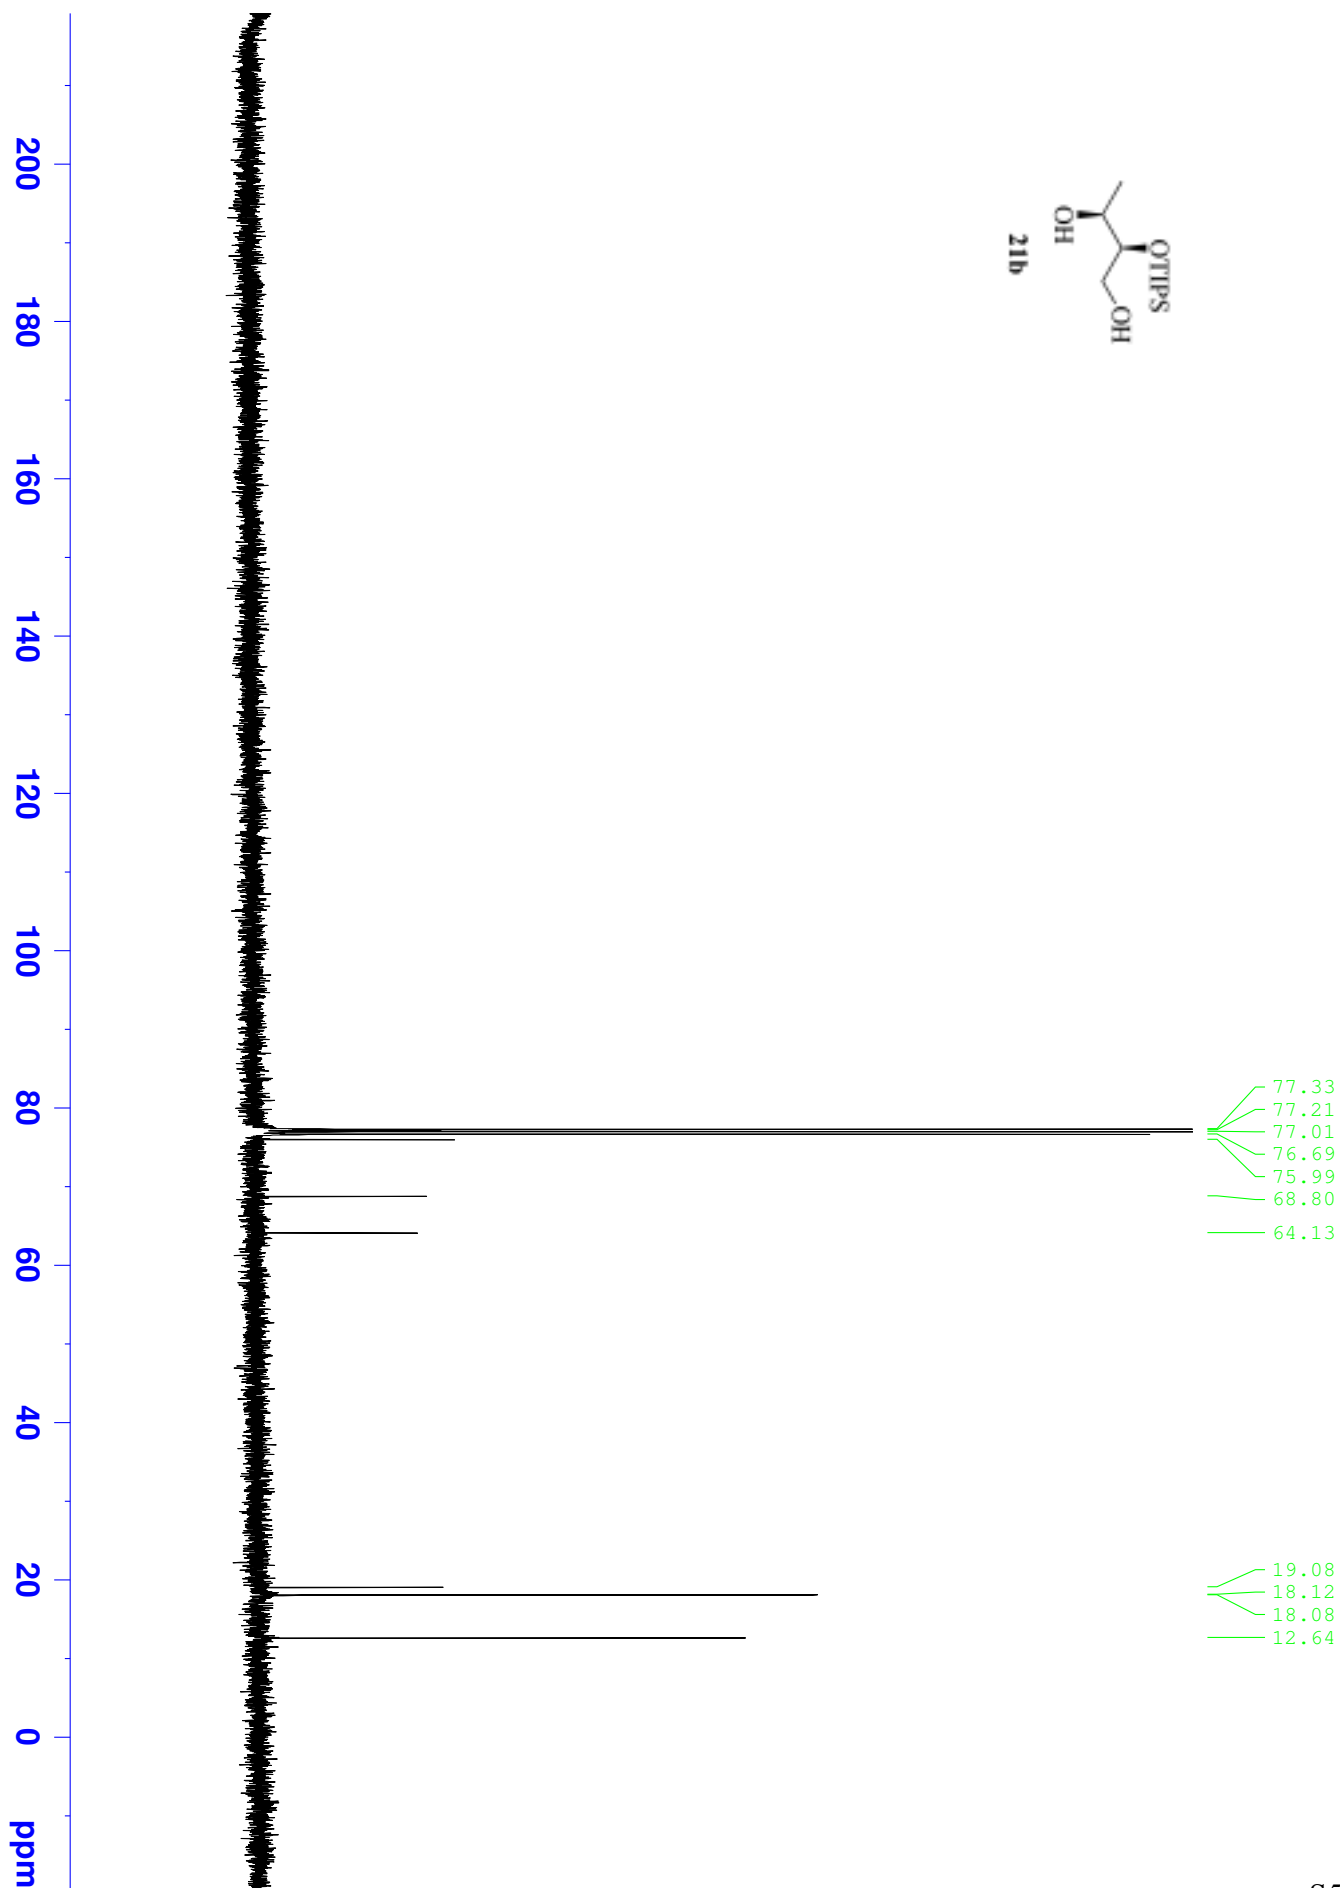

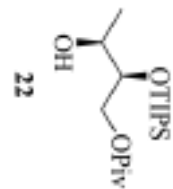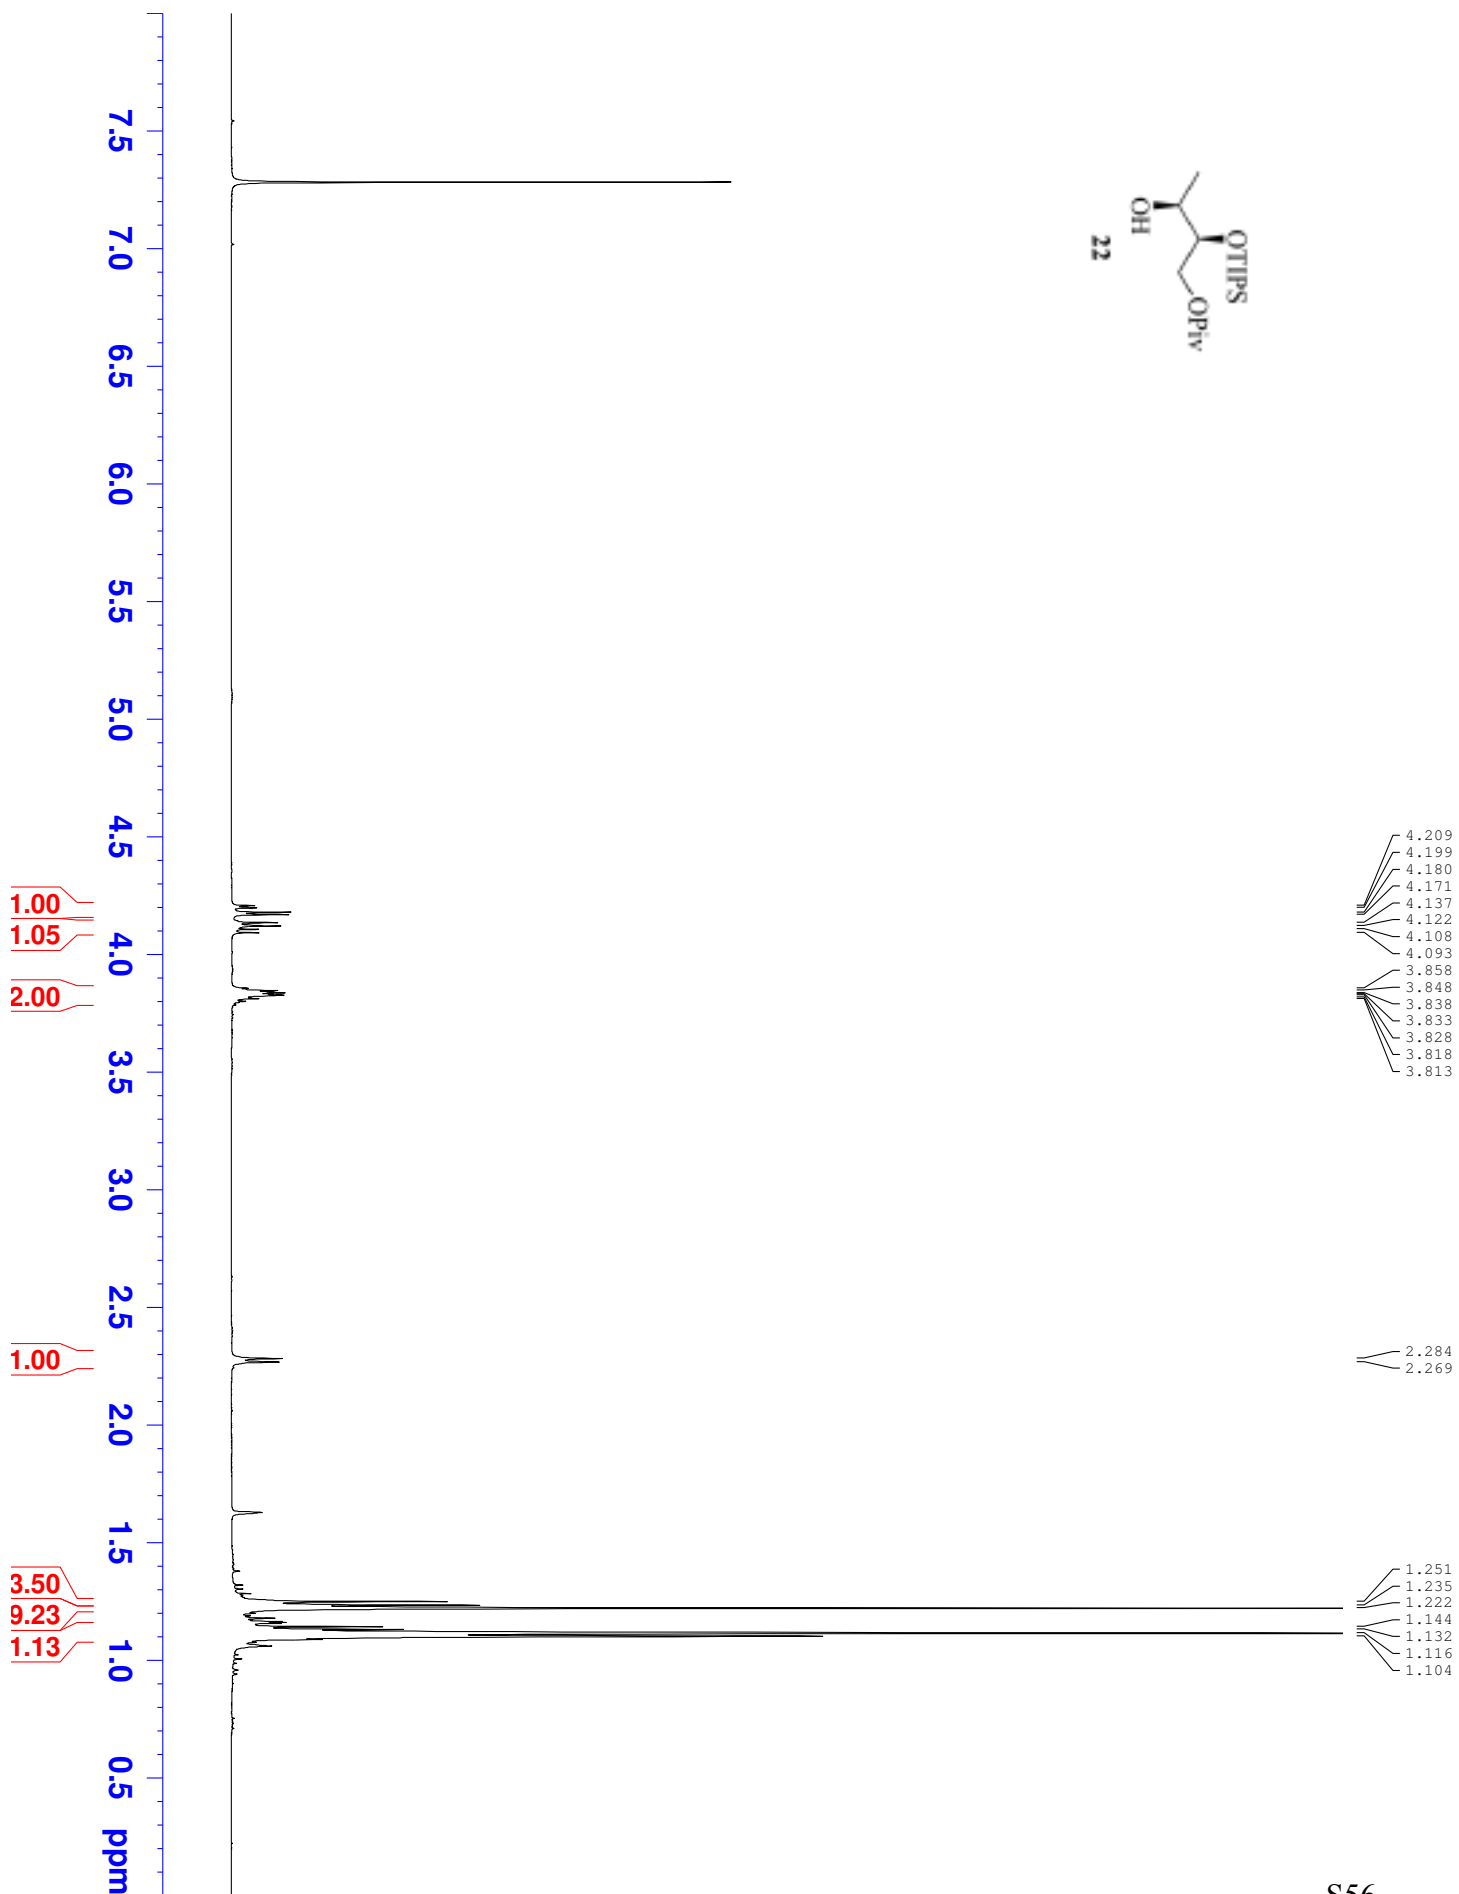



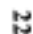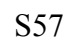

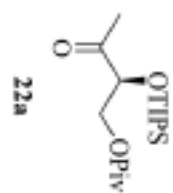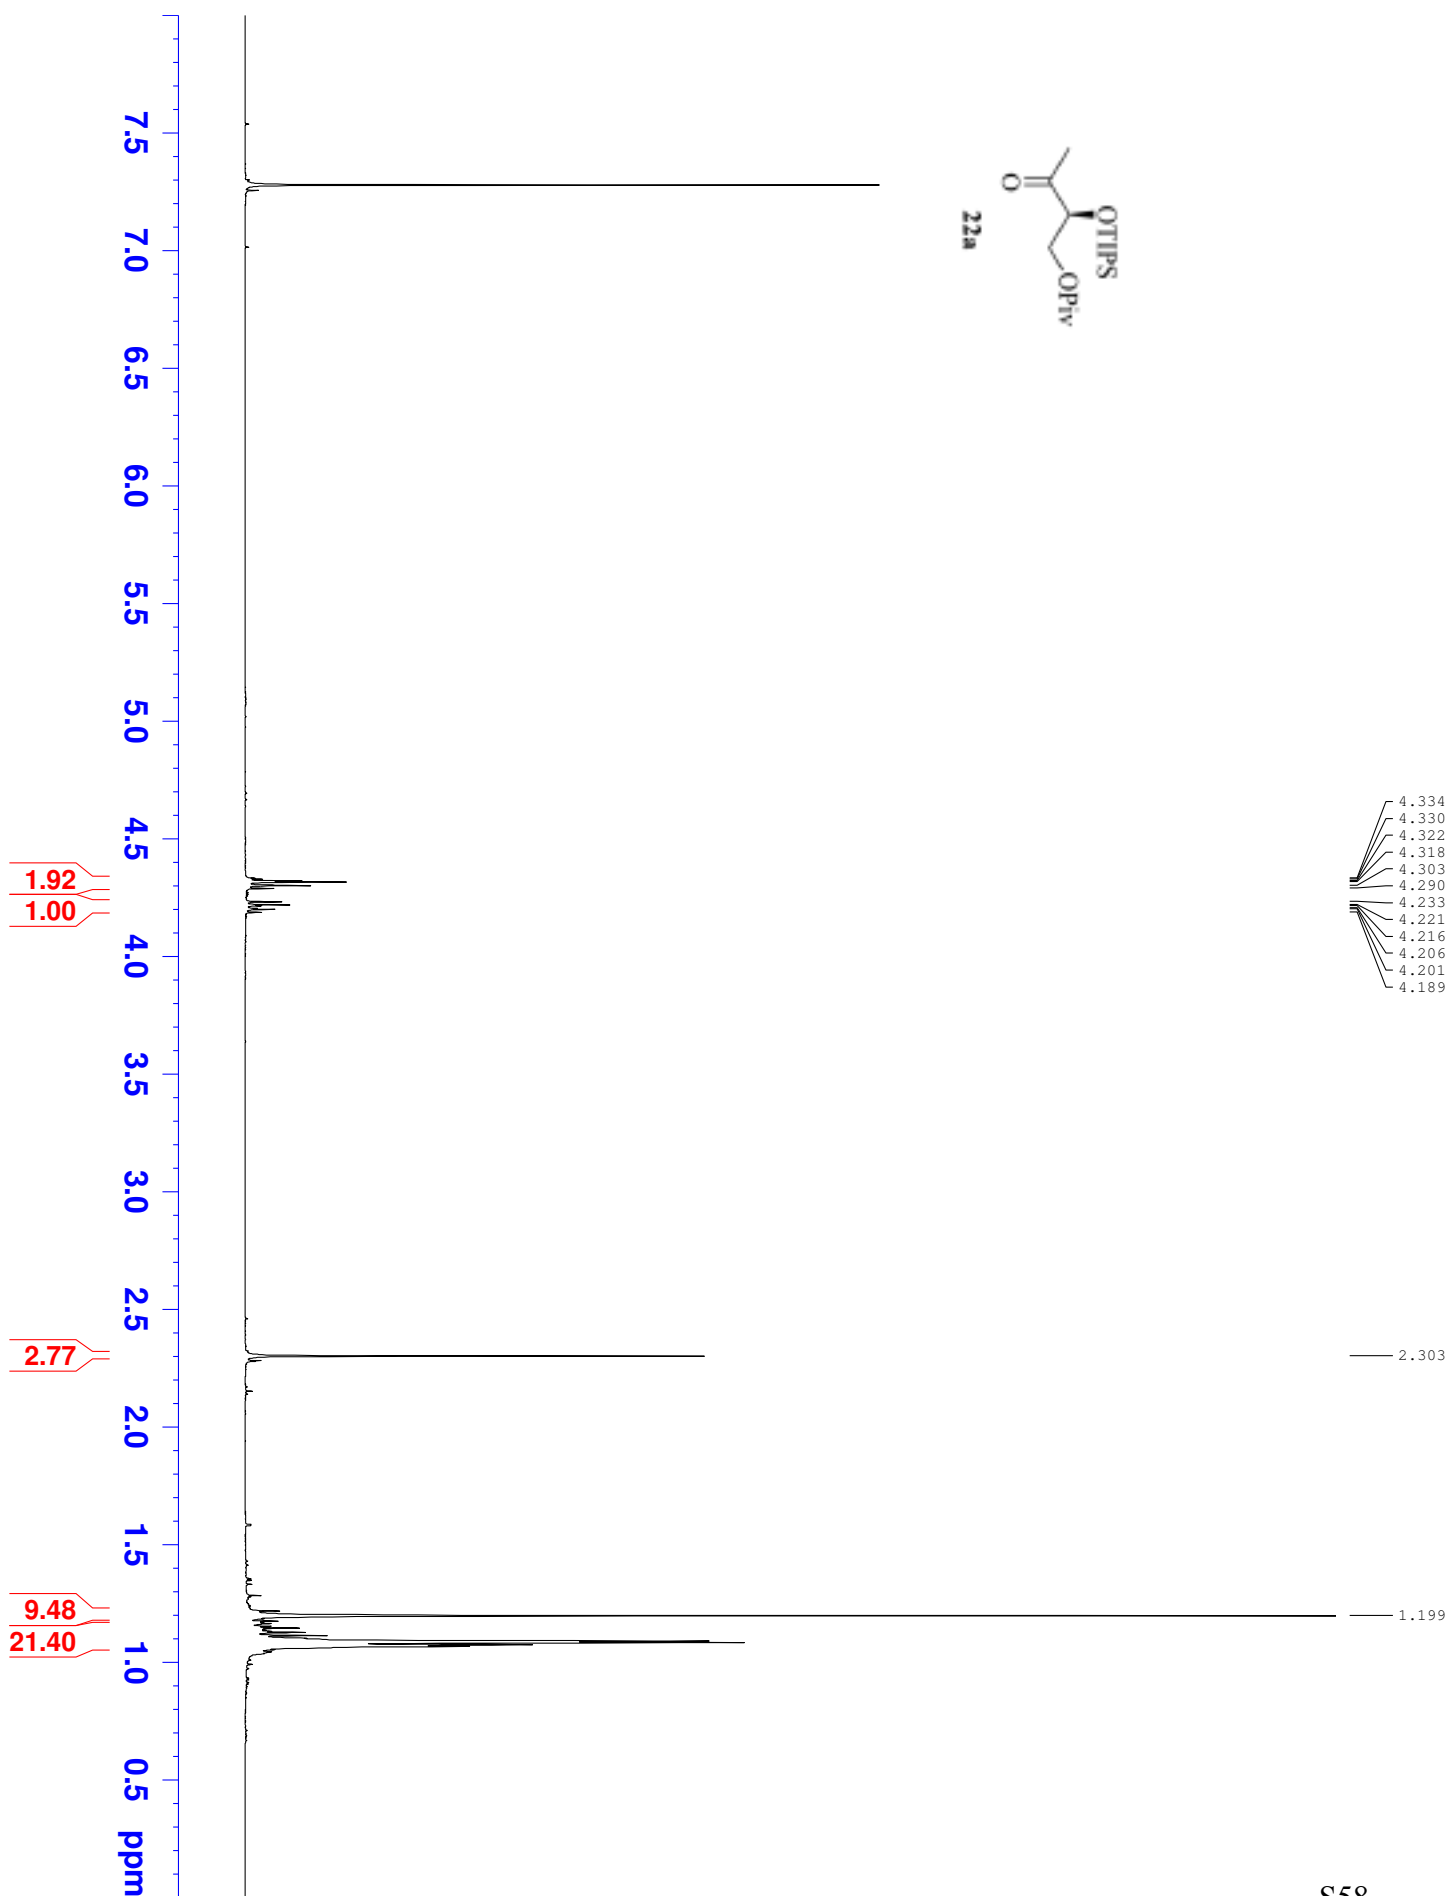

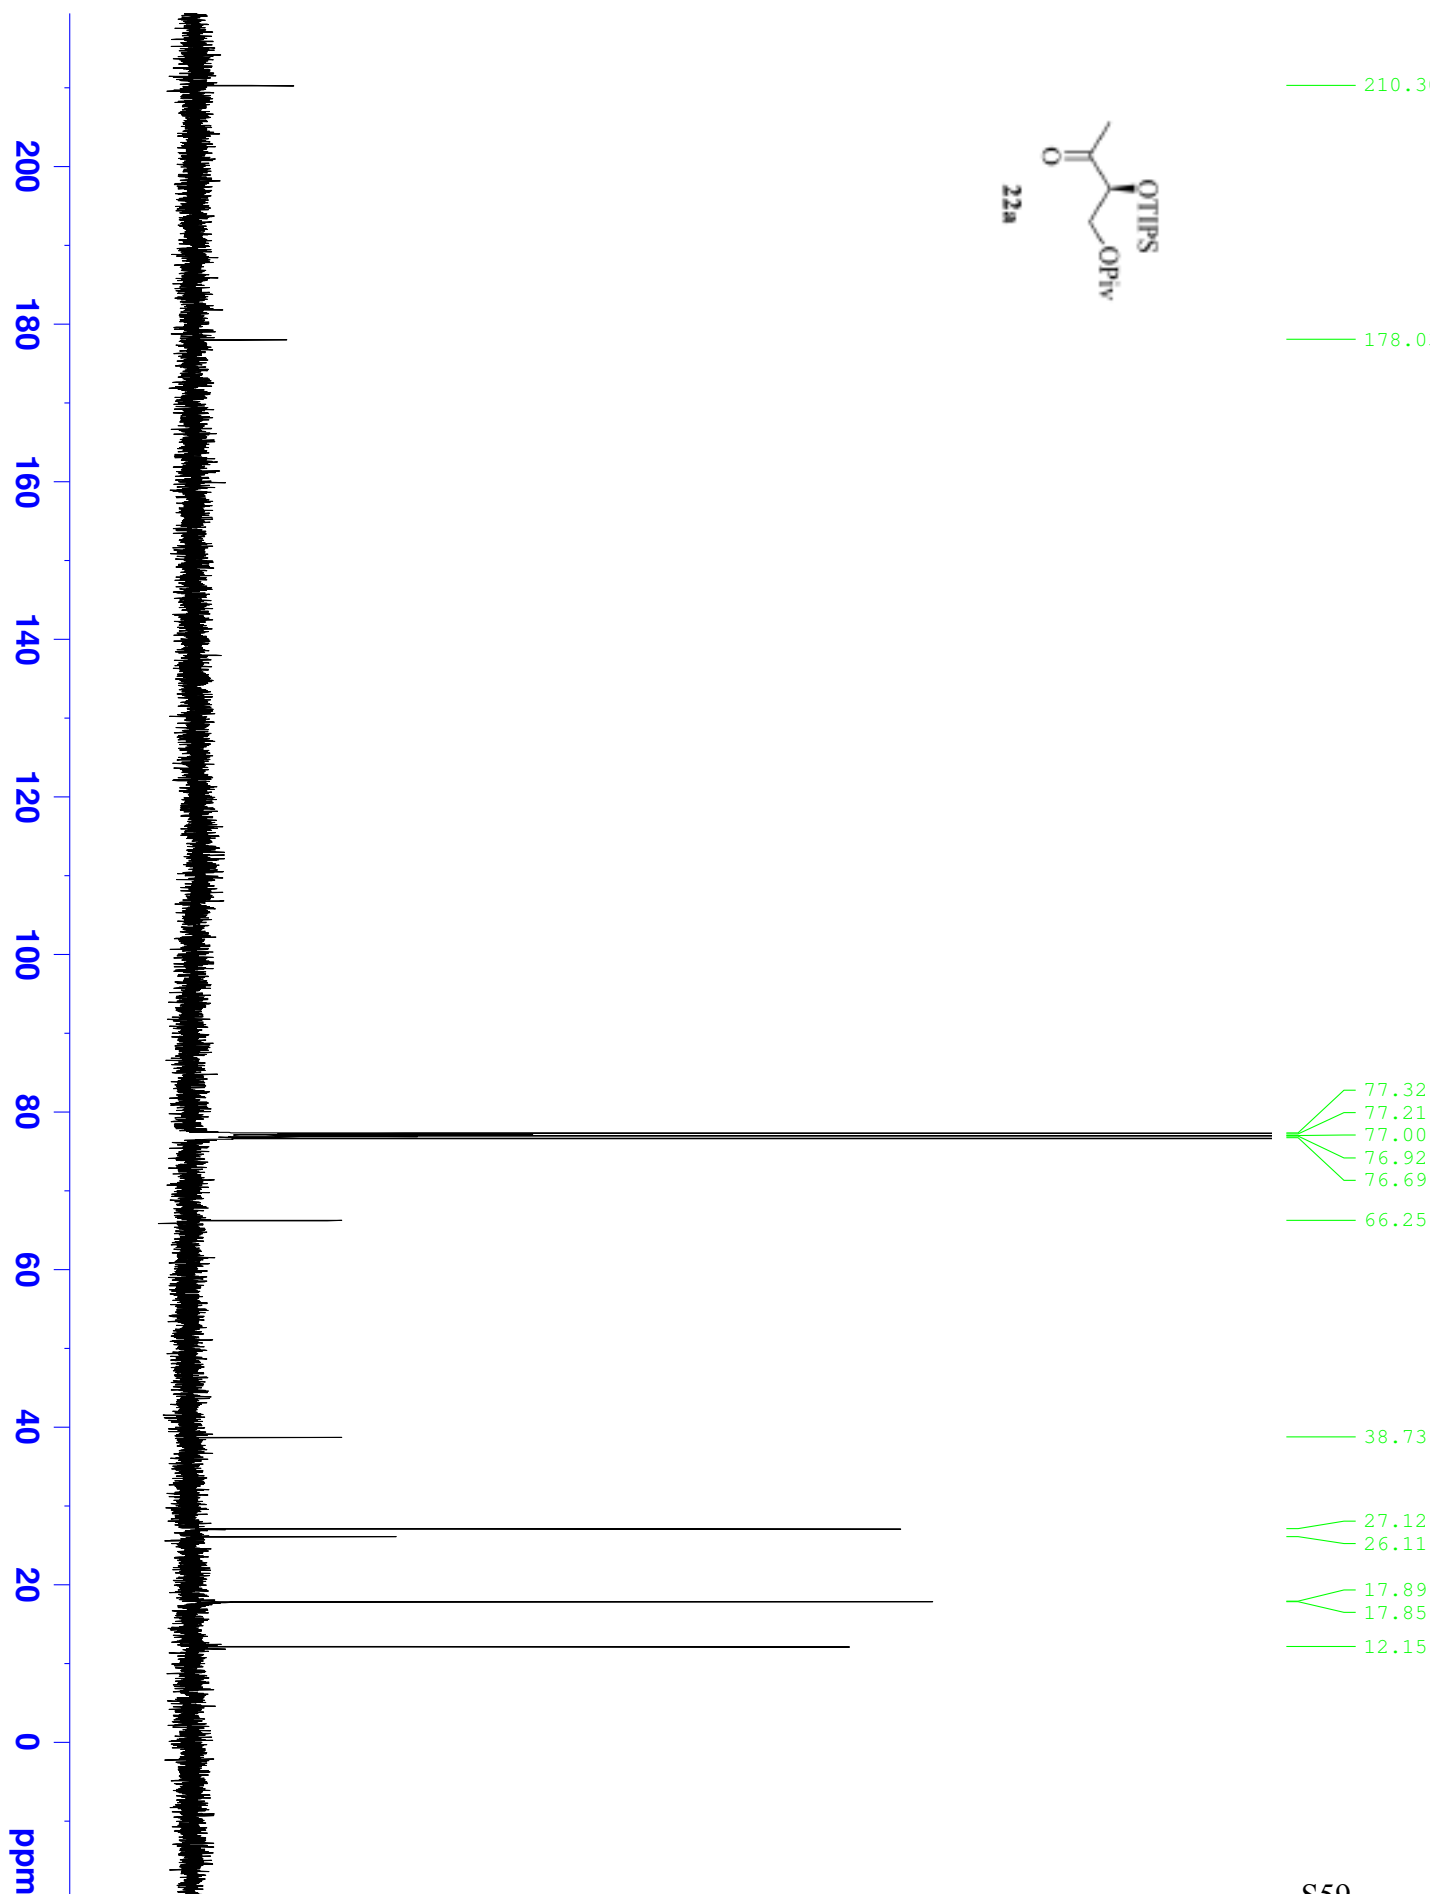

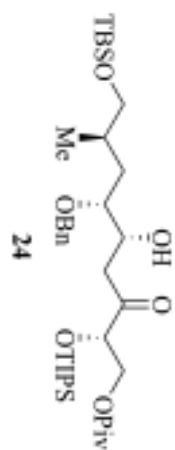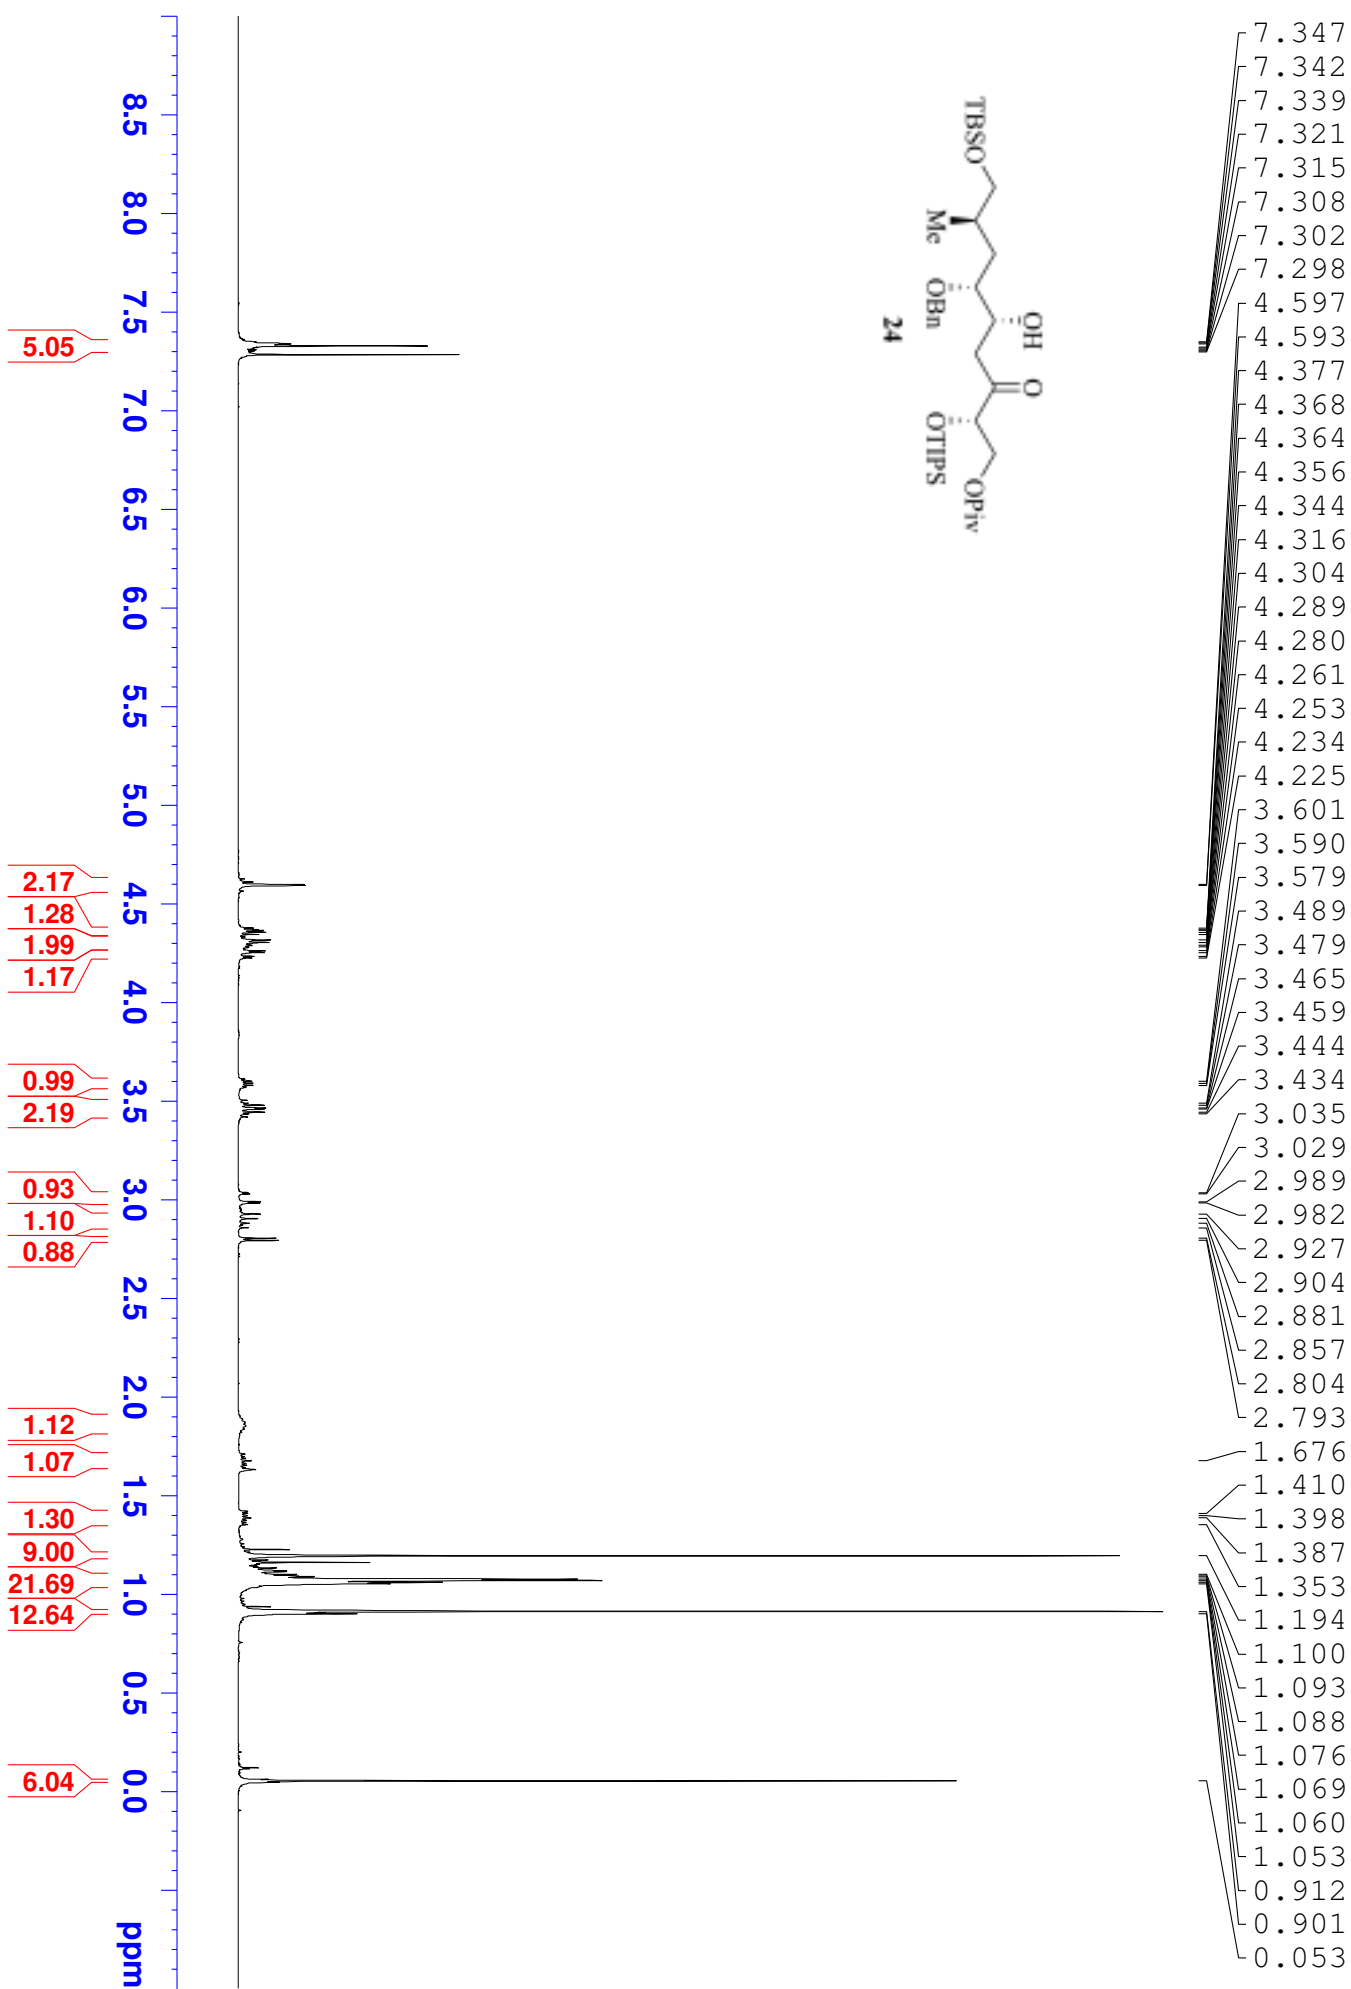





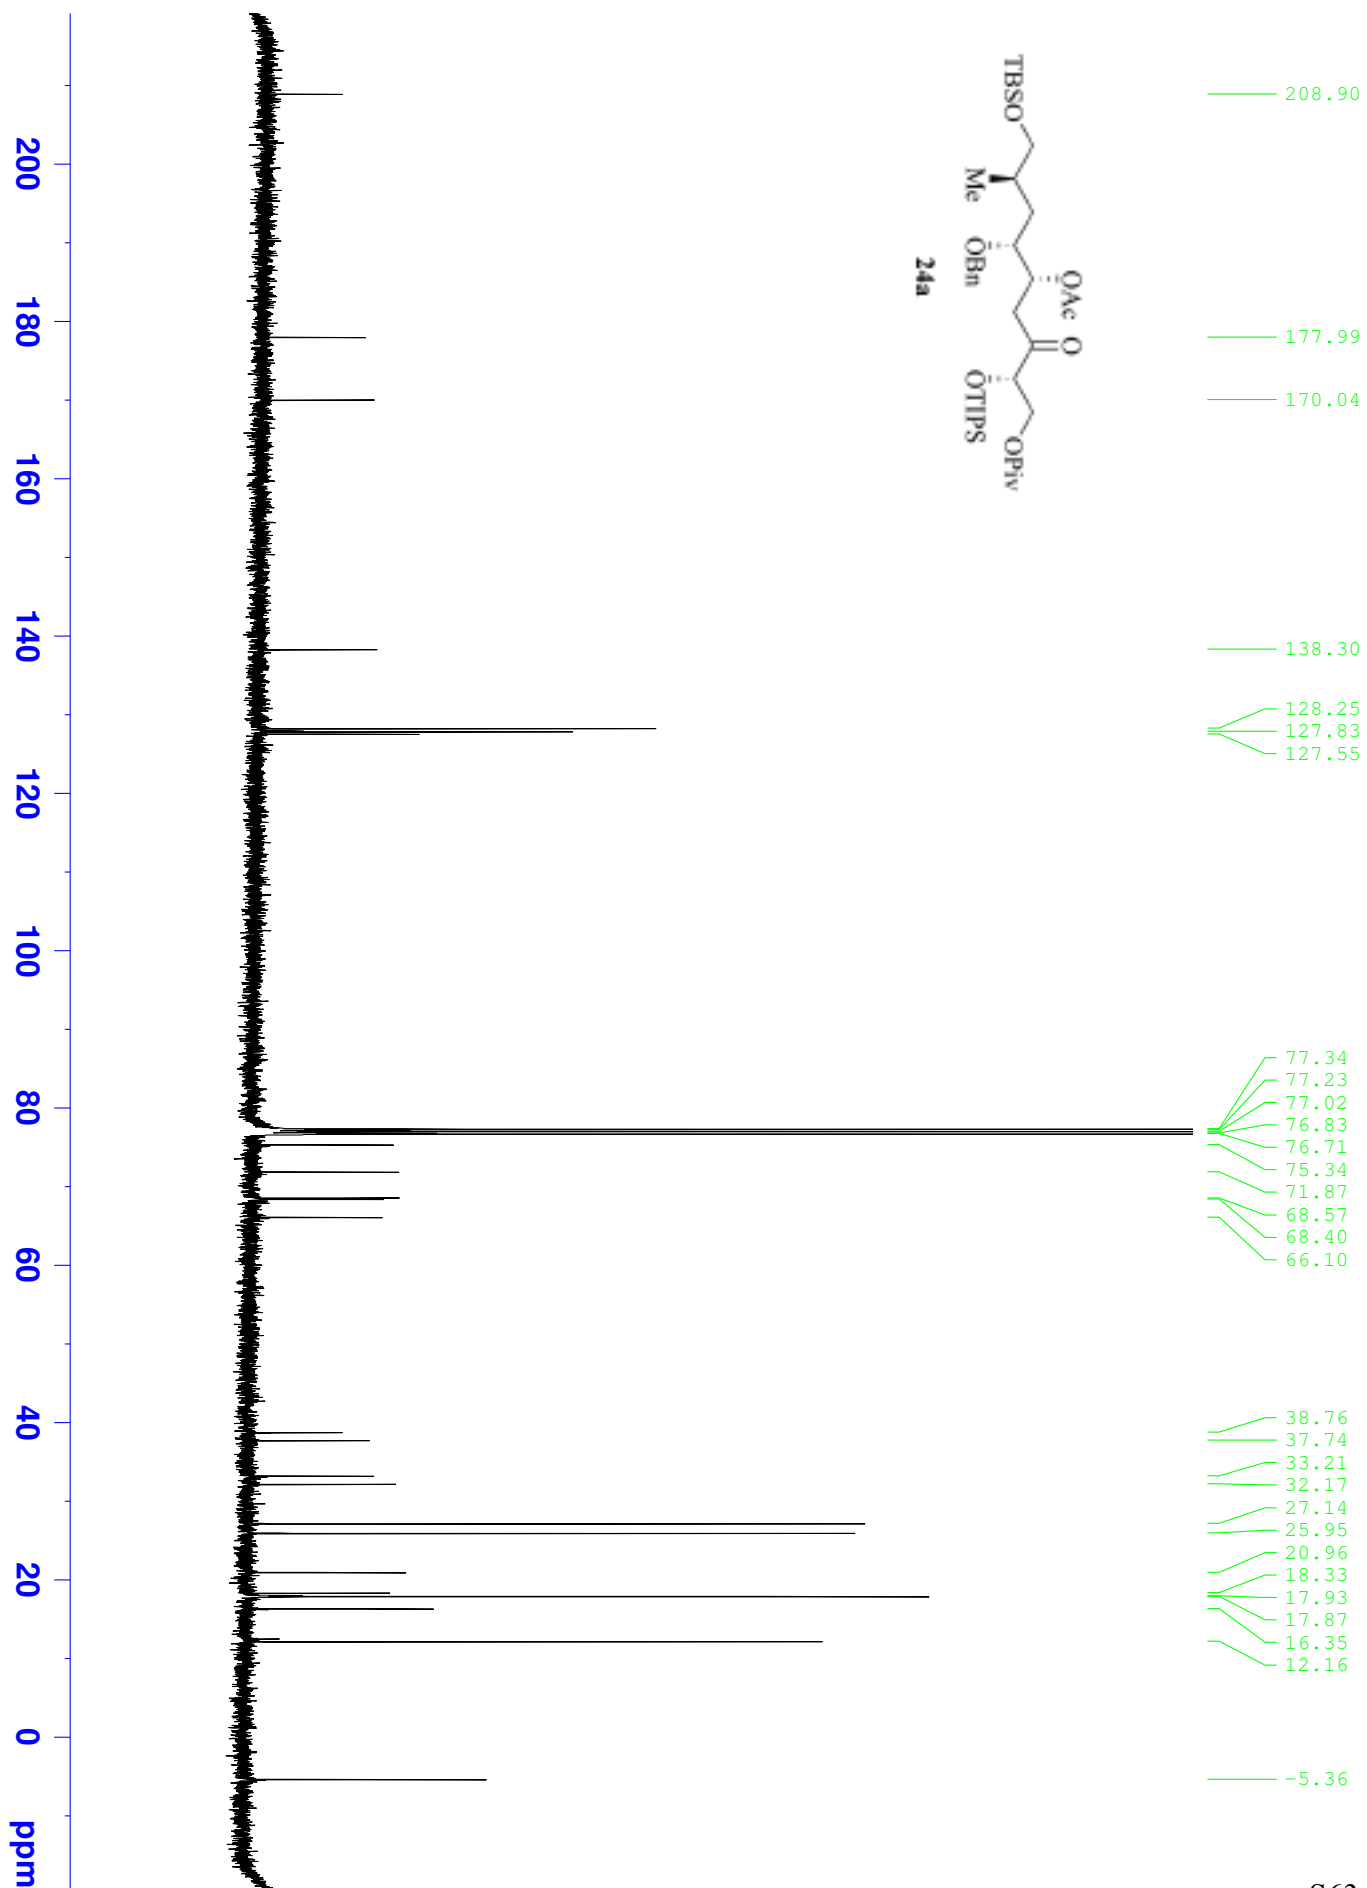

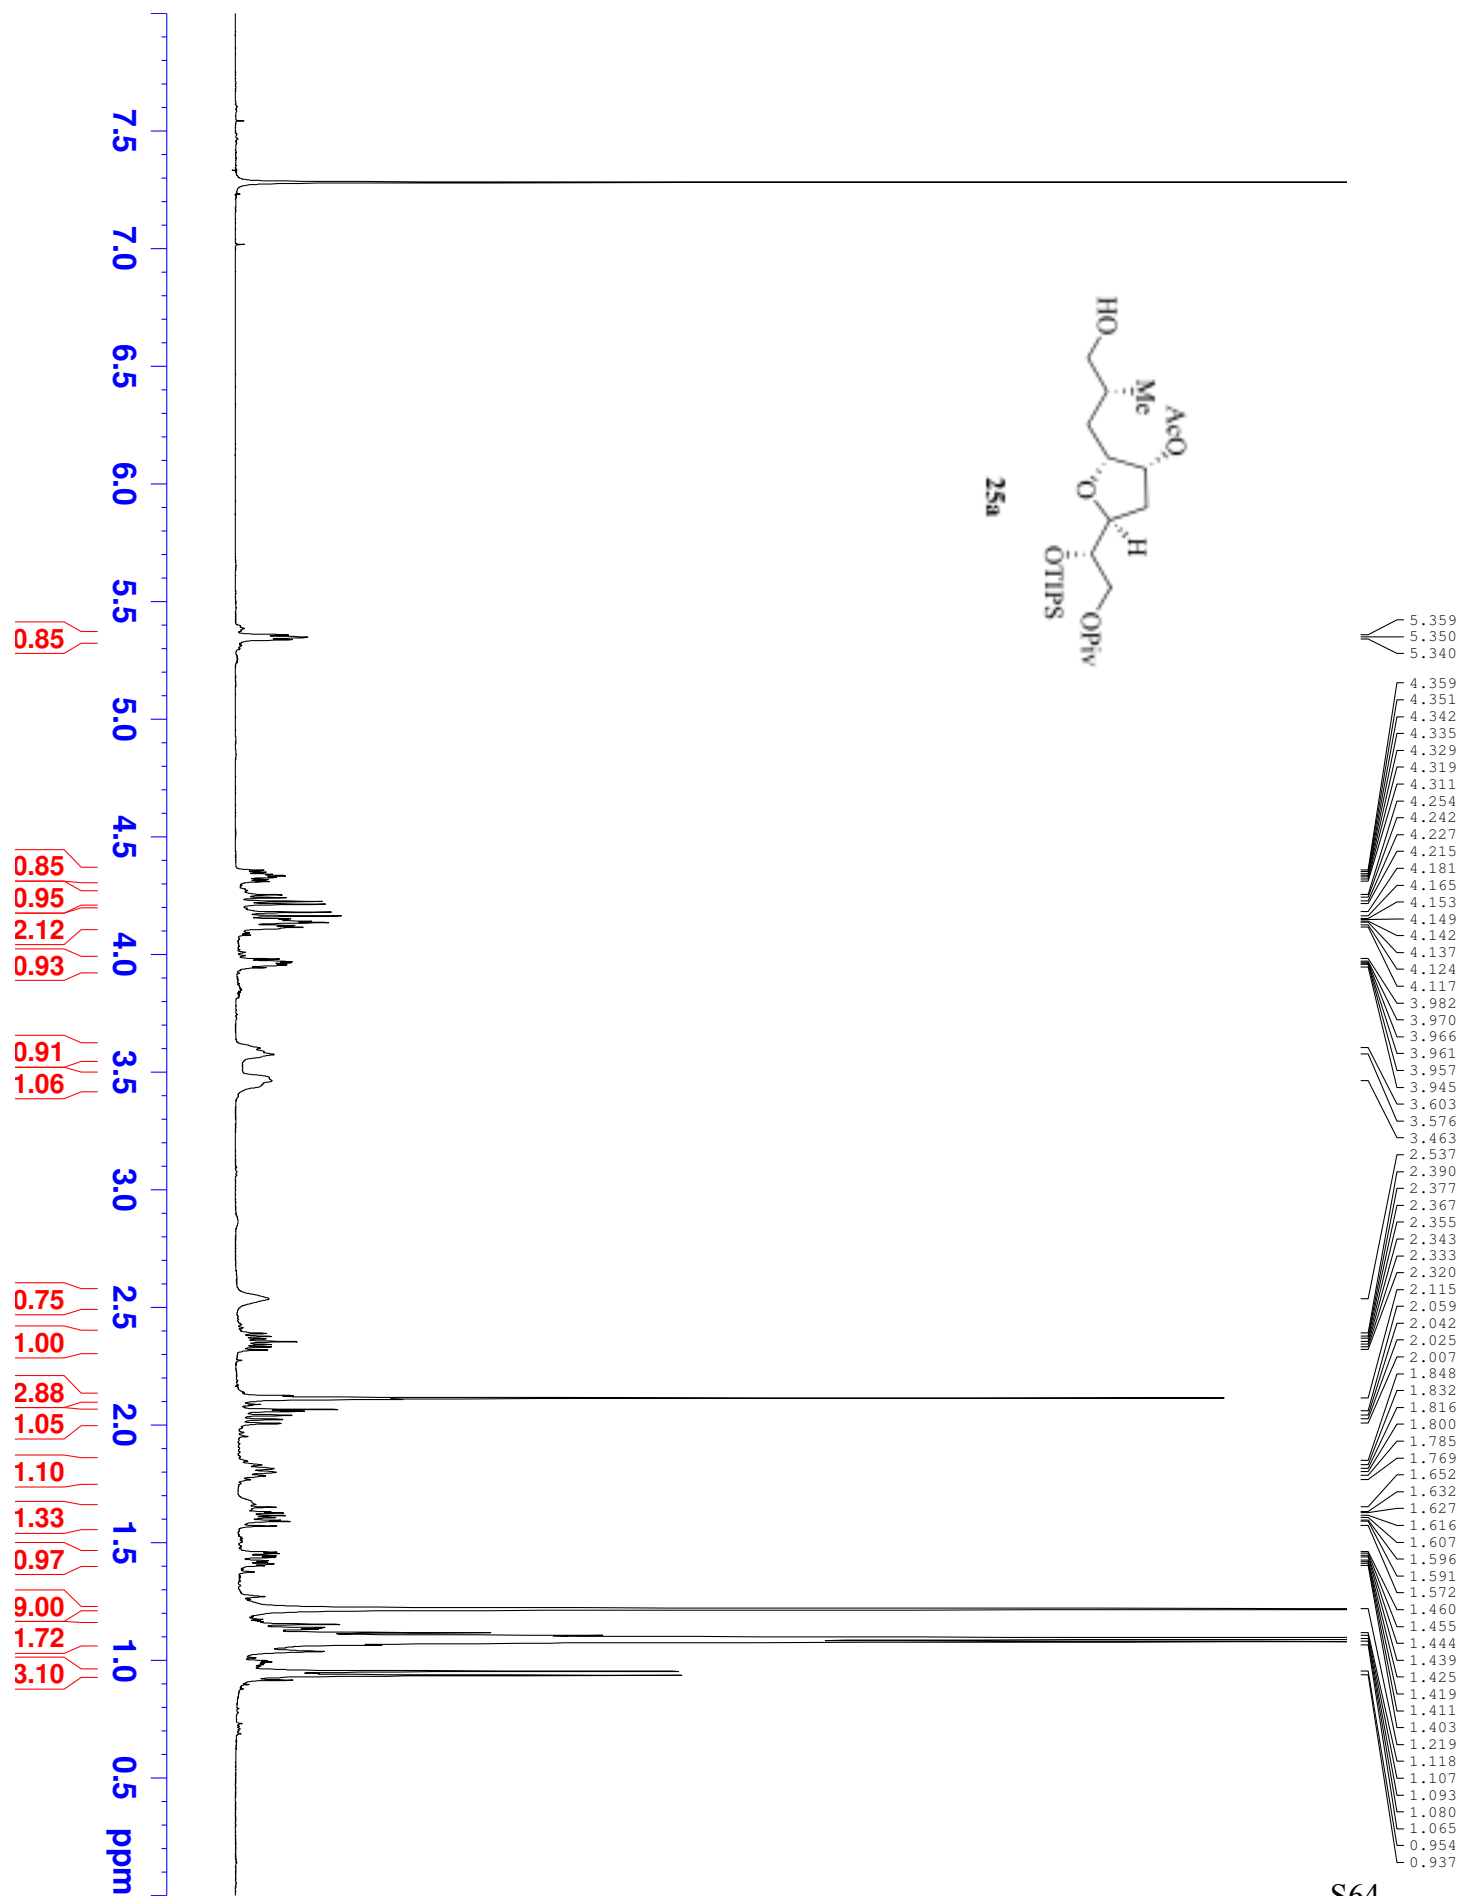



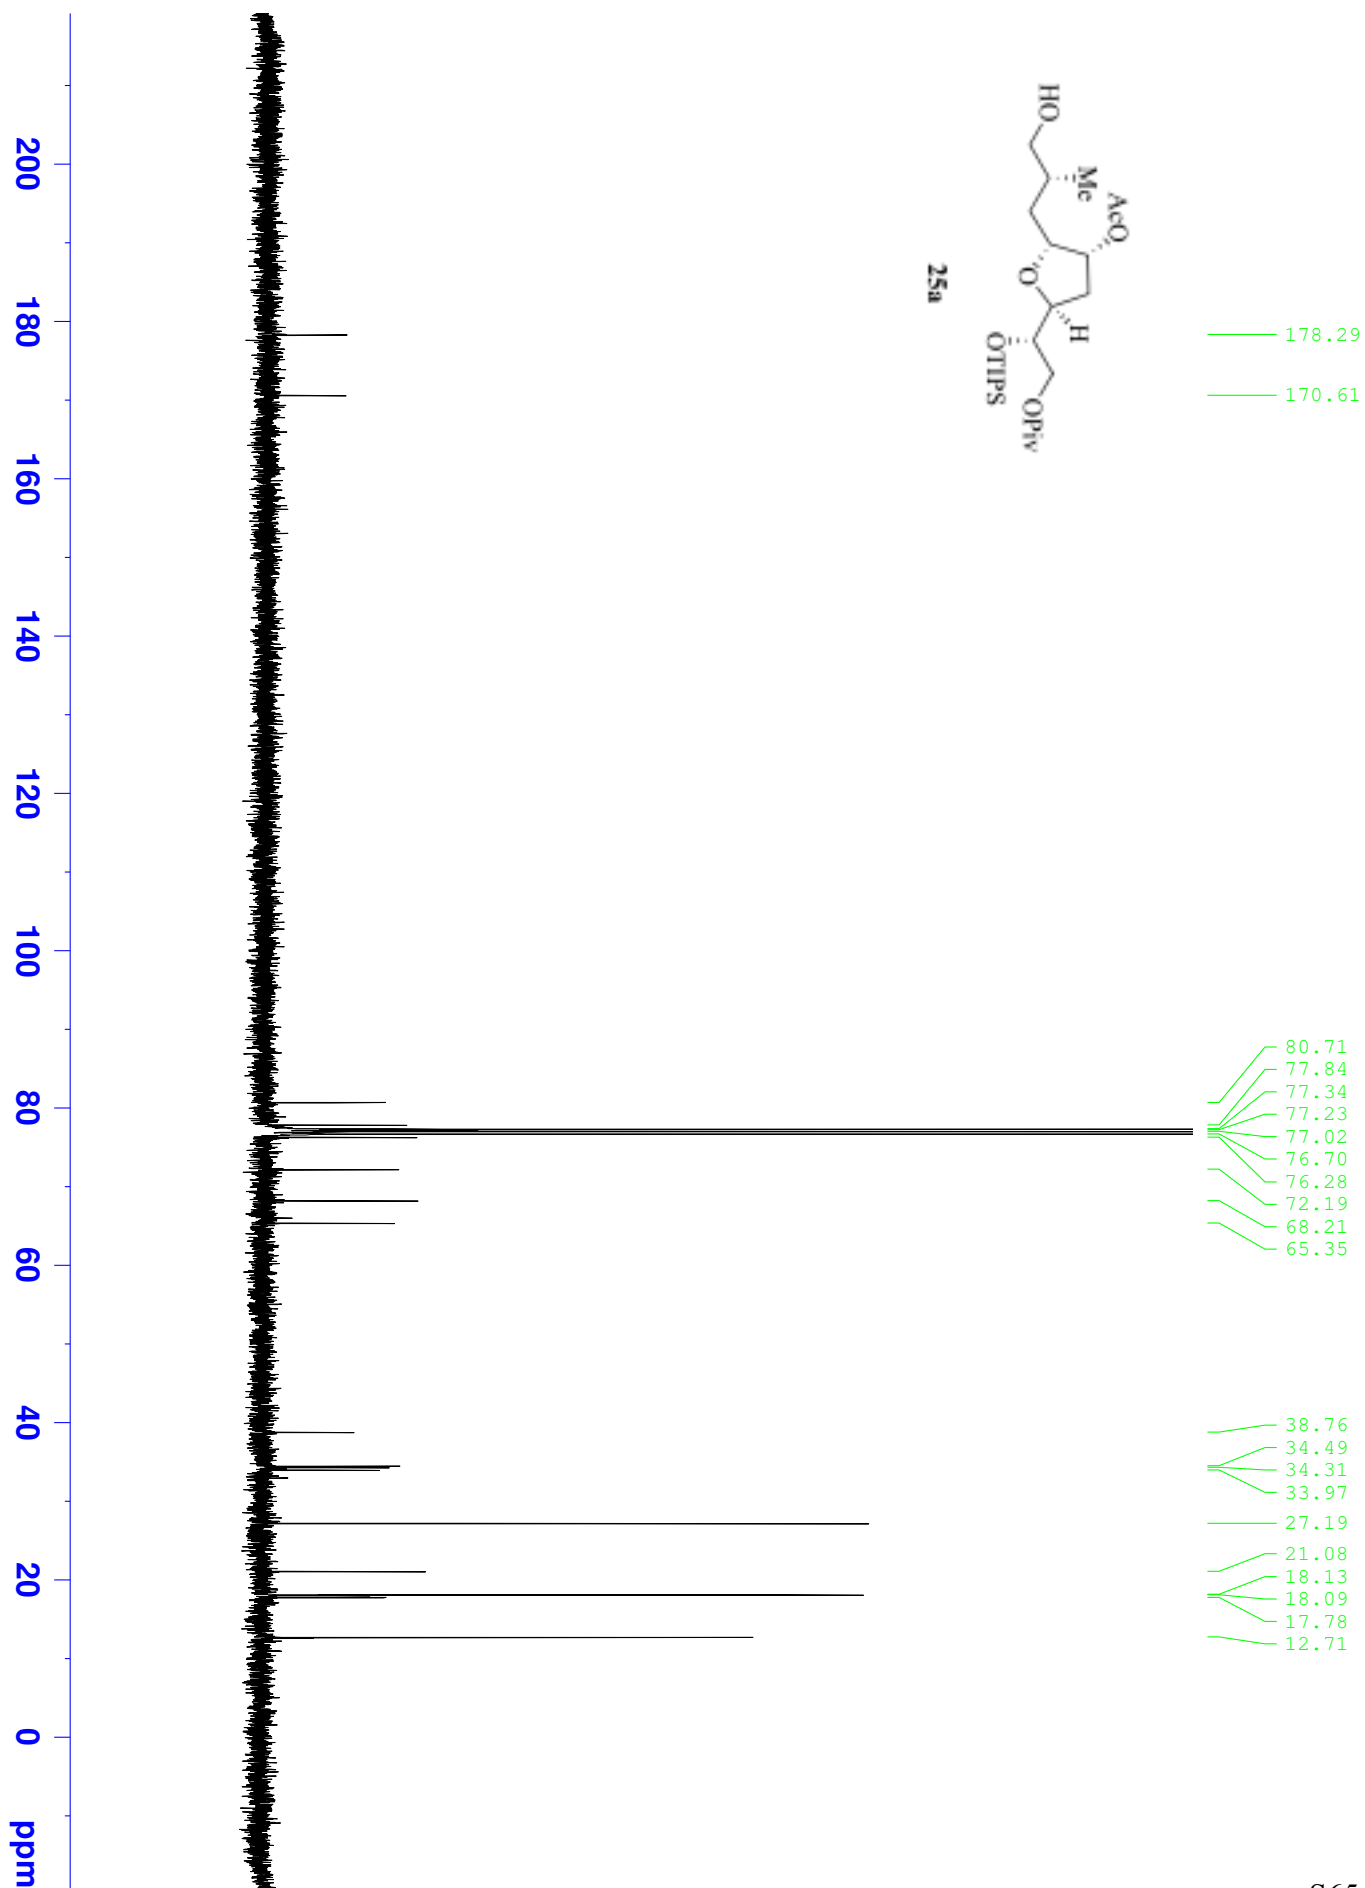

— 5.343

— 4.228

1.437  
1.428  
1.409  
1.213  
1.088  
1.078  
0.947  
0.934

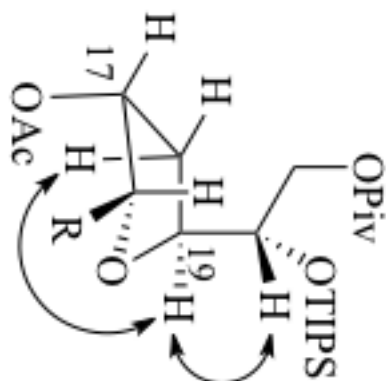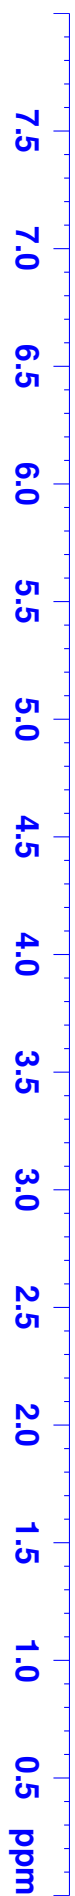

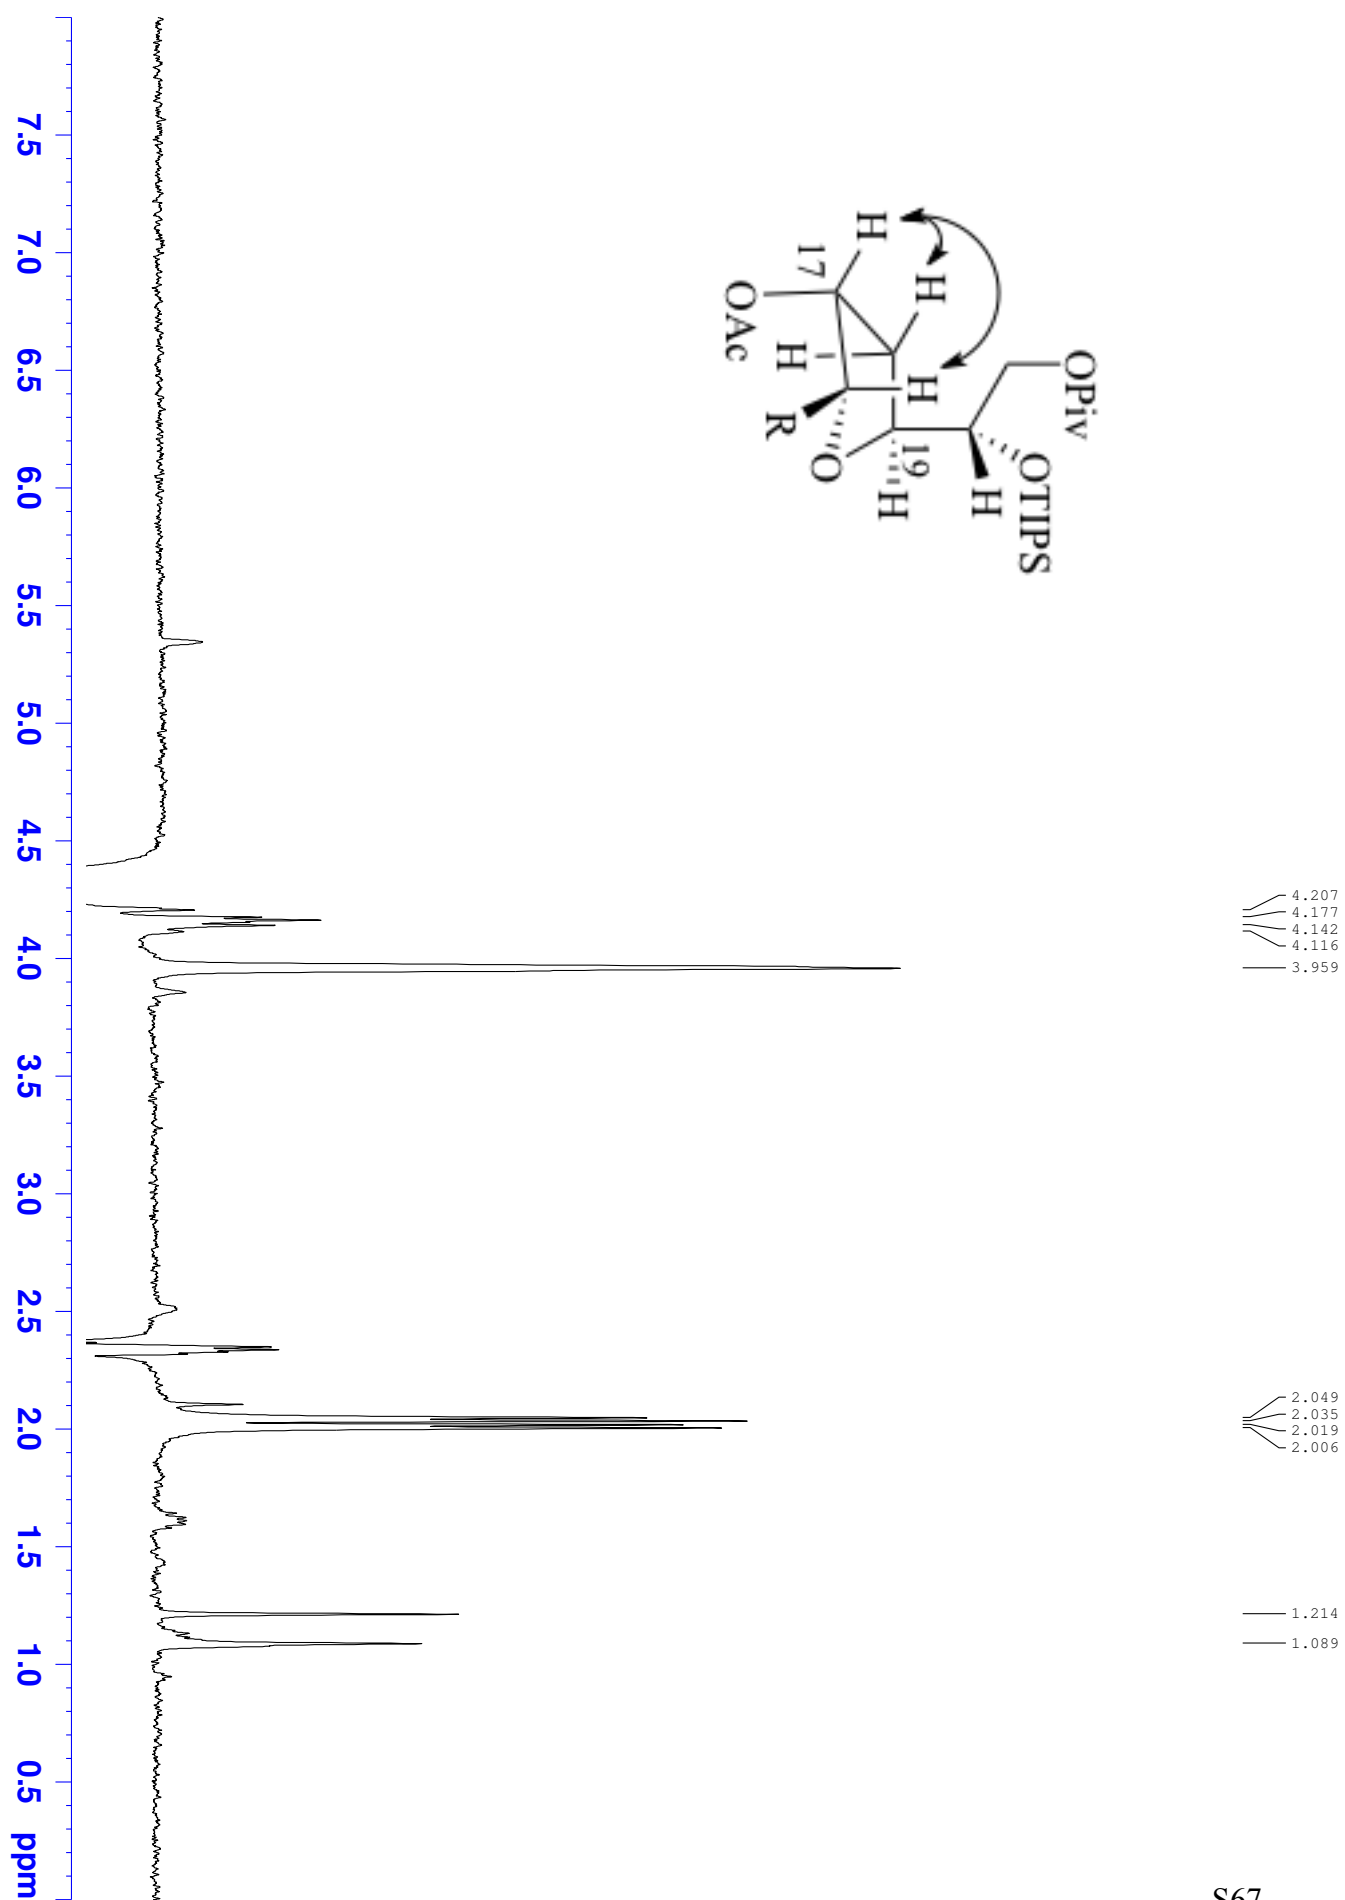

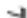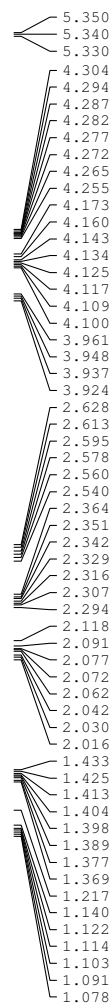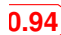

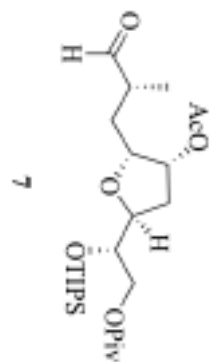

204.38

178.30

170.48

78.76  
77.80  
77.33  
77.22  
77.02  
76.70  
75.73  
72.59  
65.46

43.85

38.76

34.53

30.17

27.18

21.03

18.11

18.07

13.21

12.70

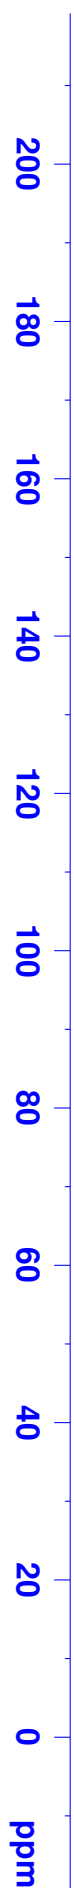

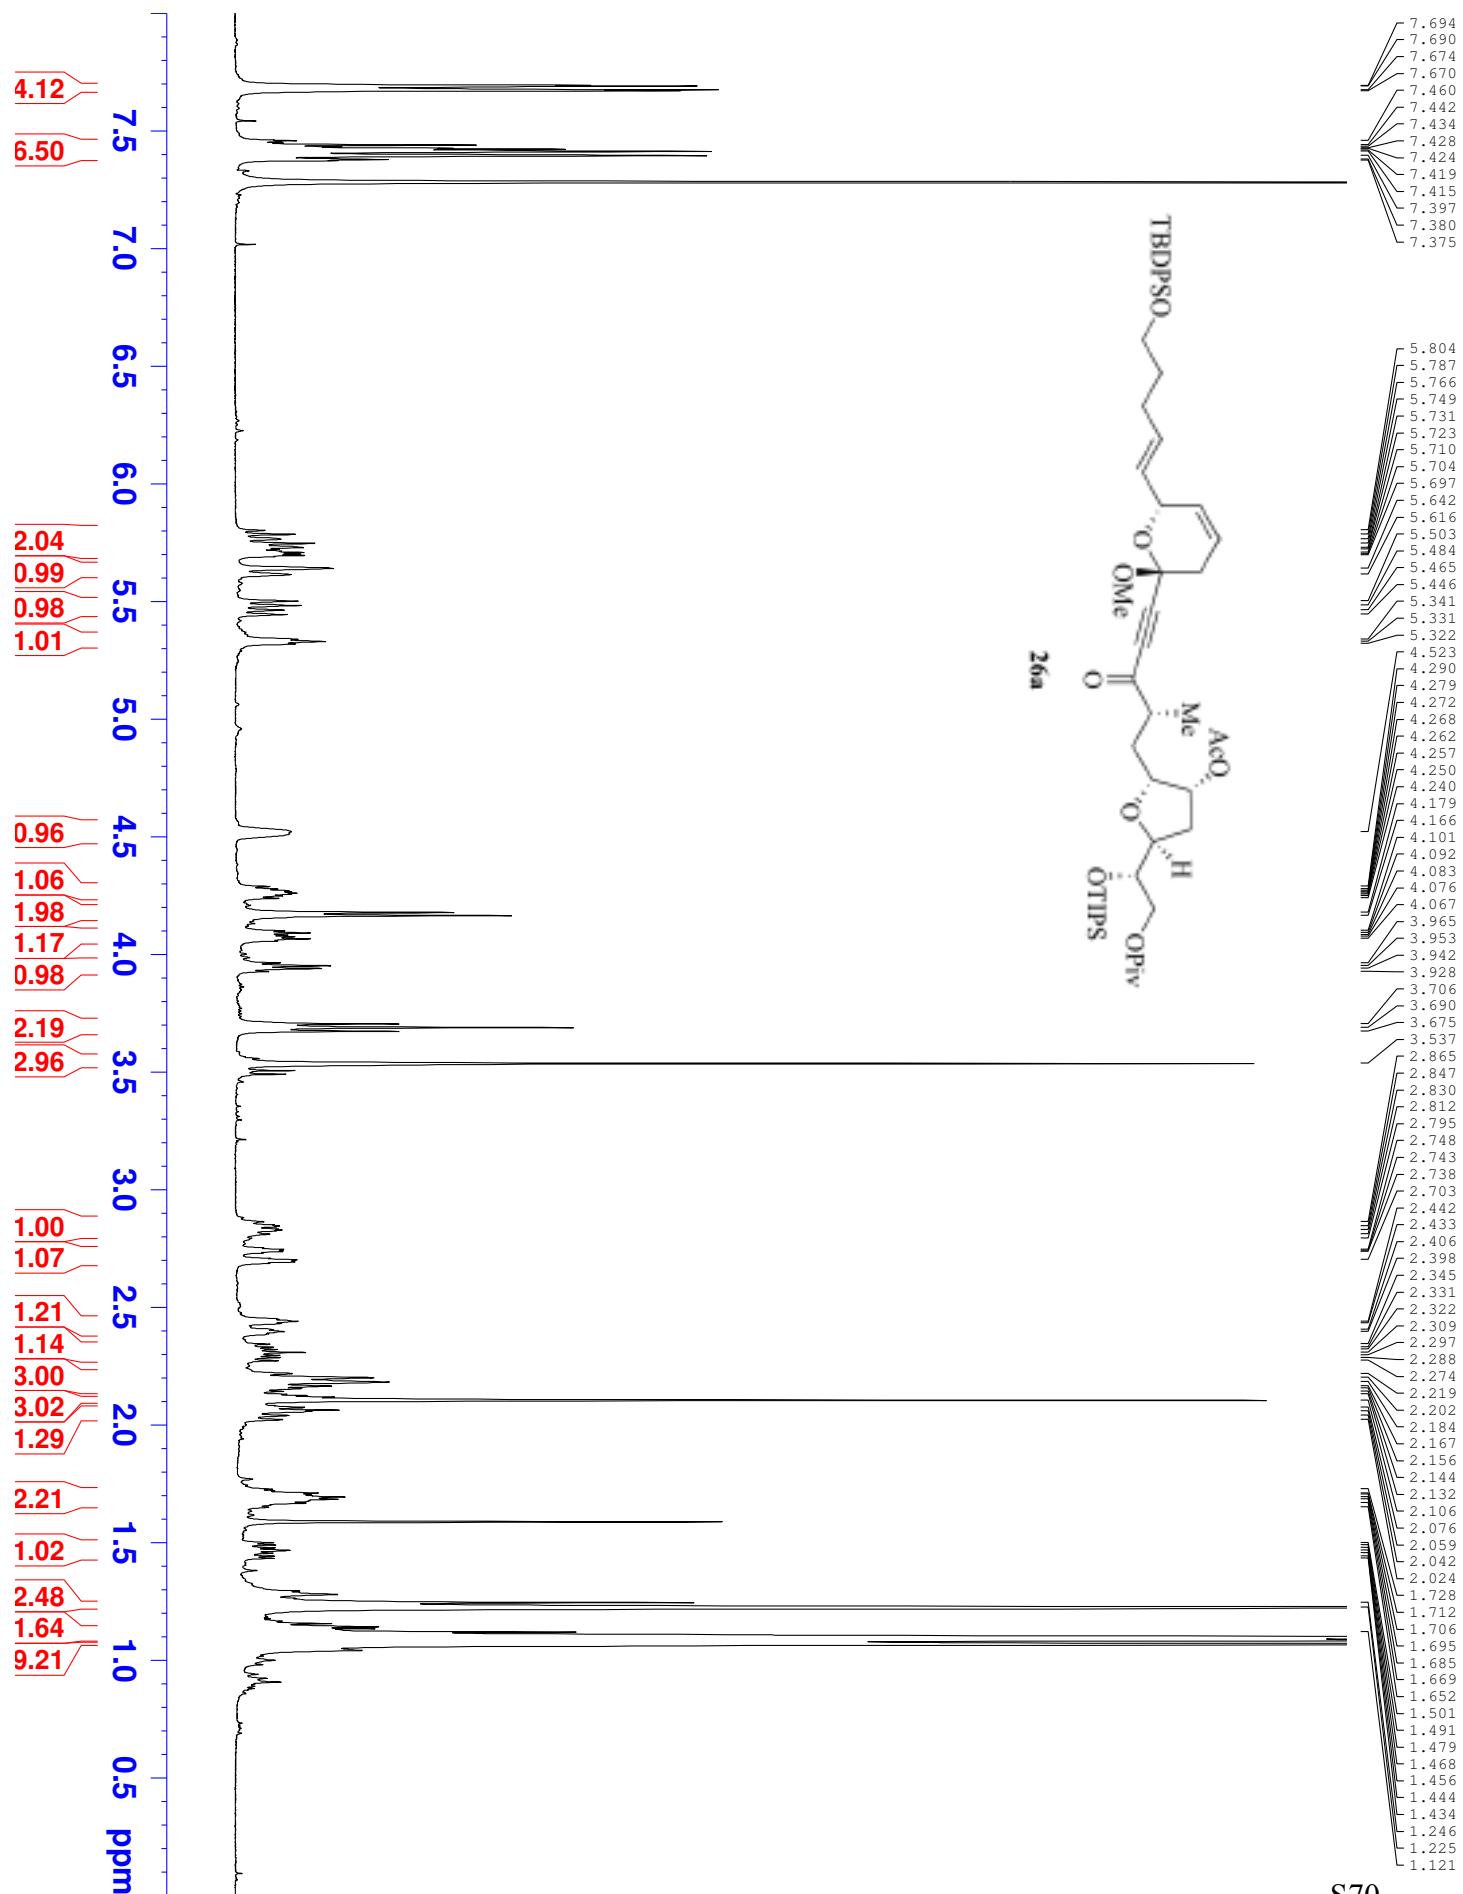

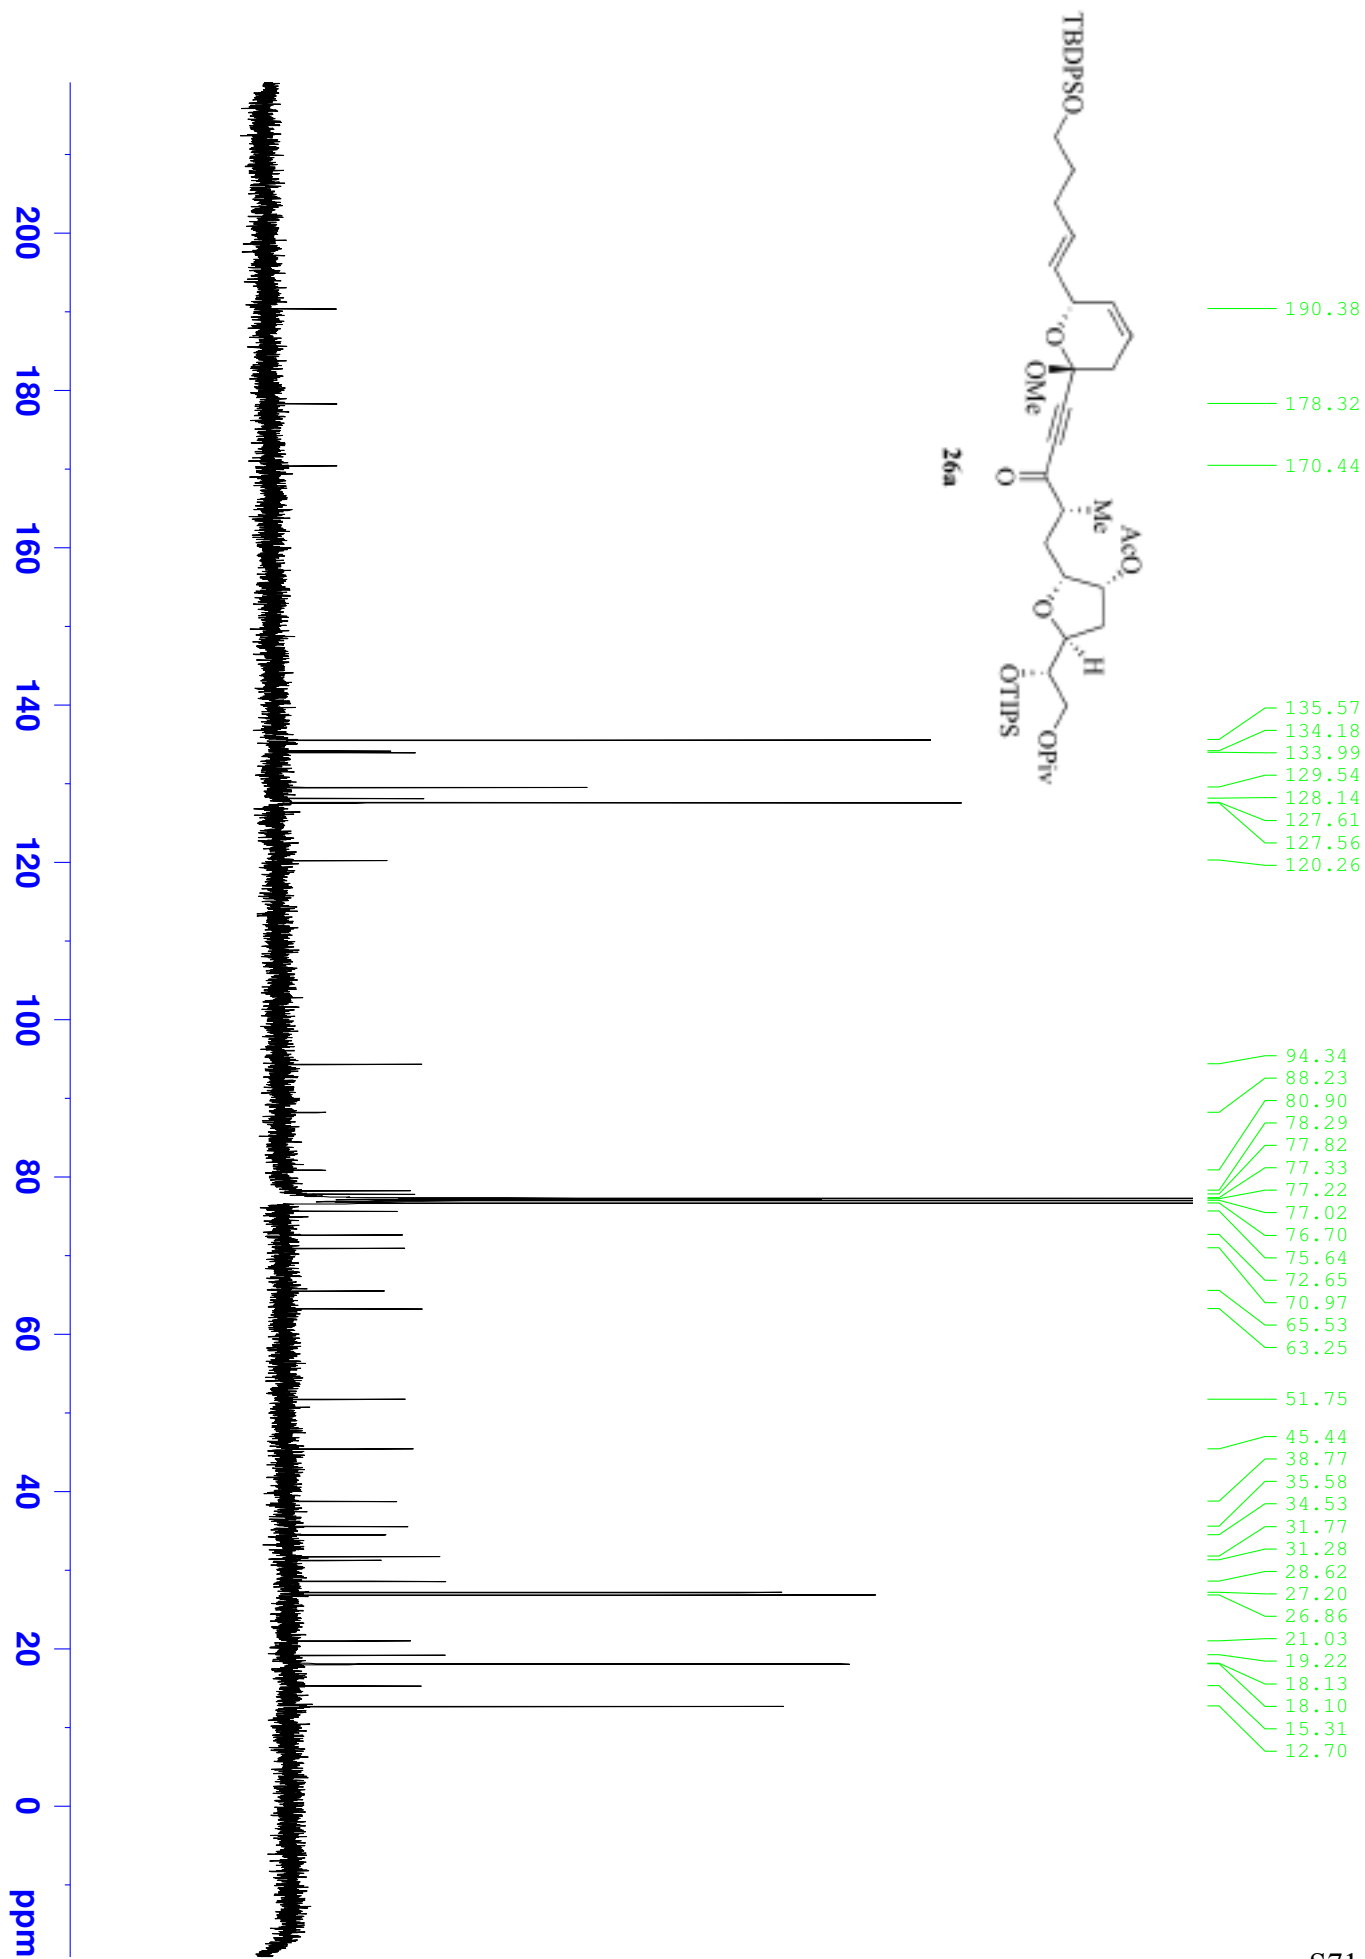

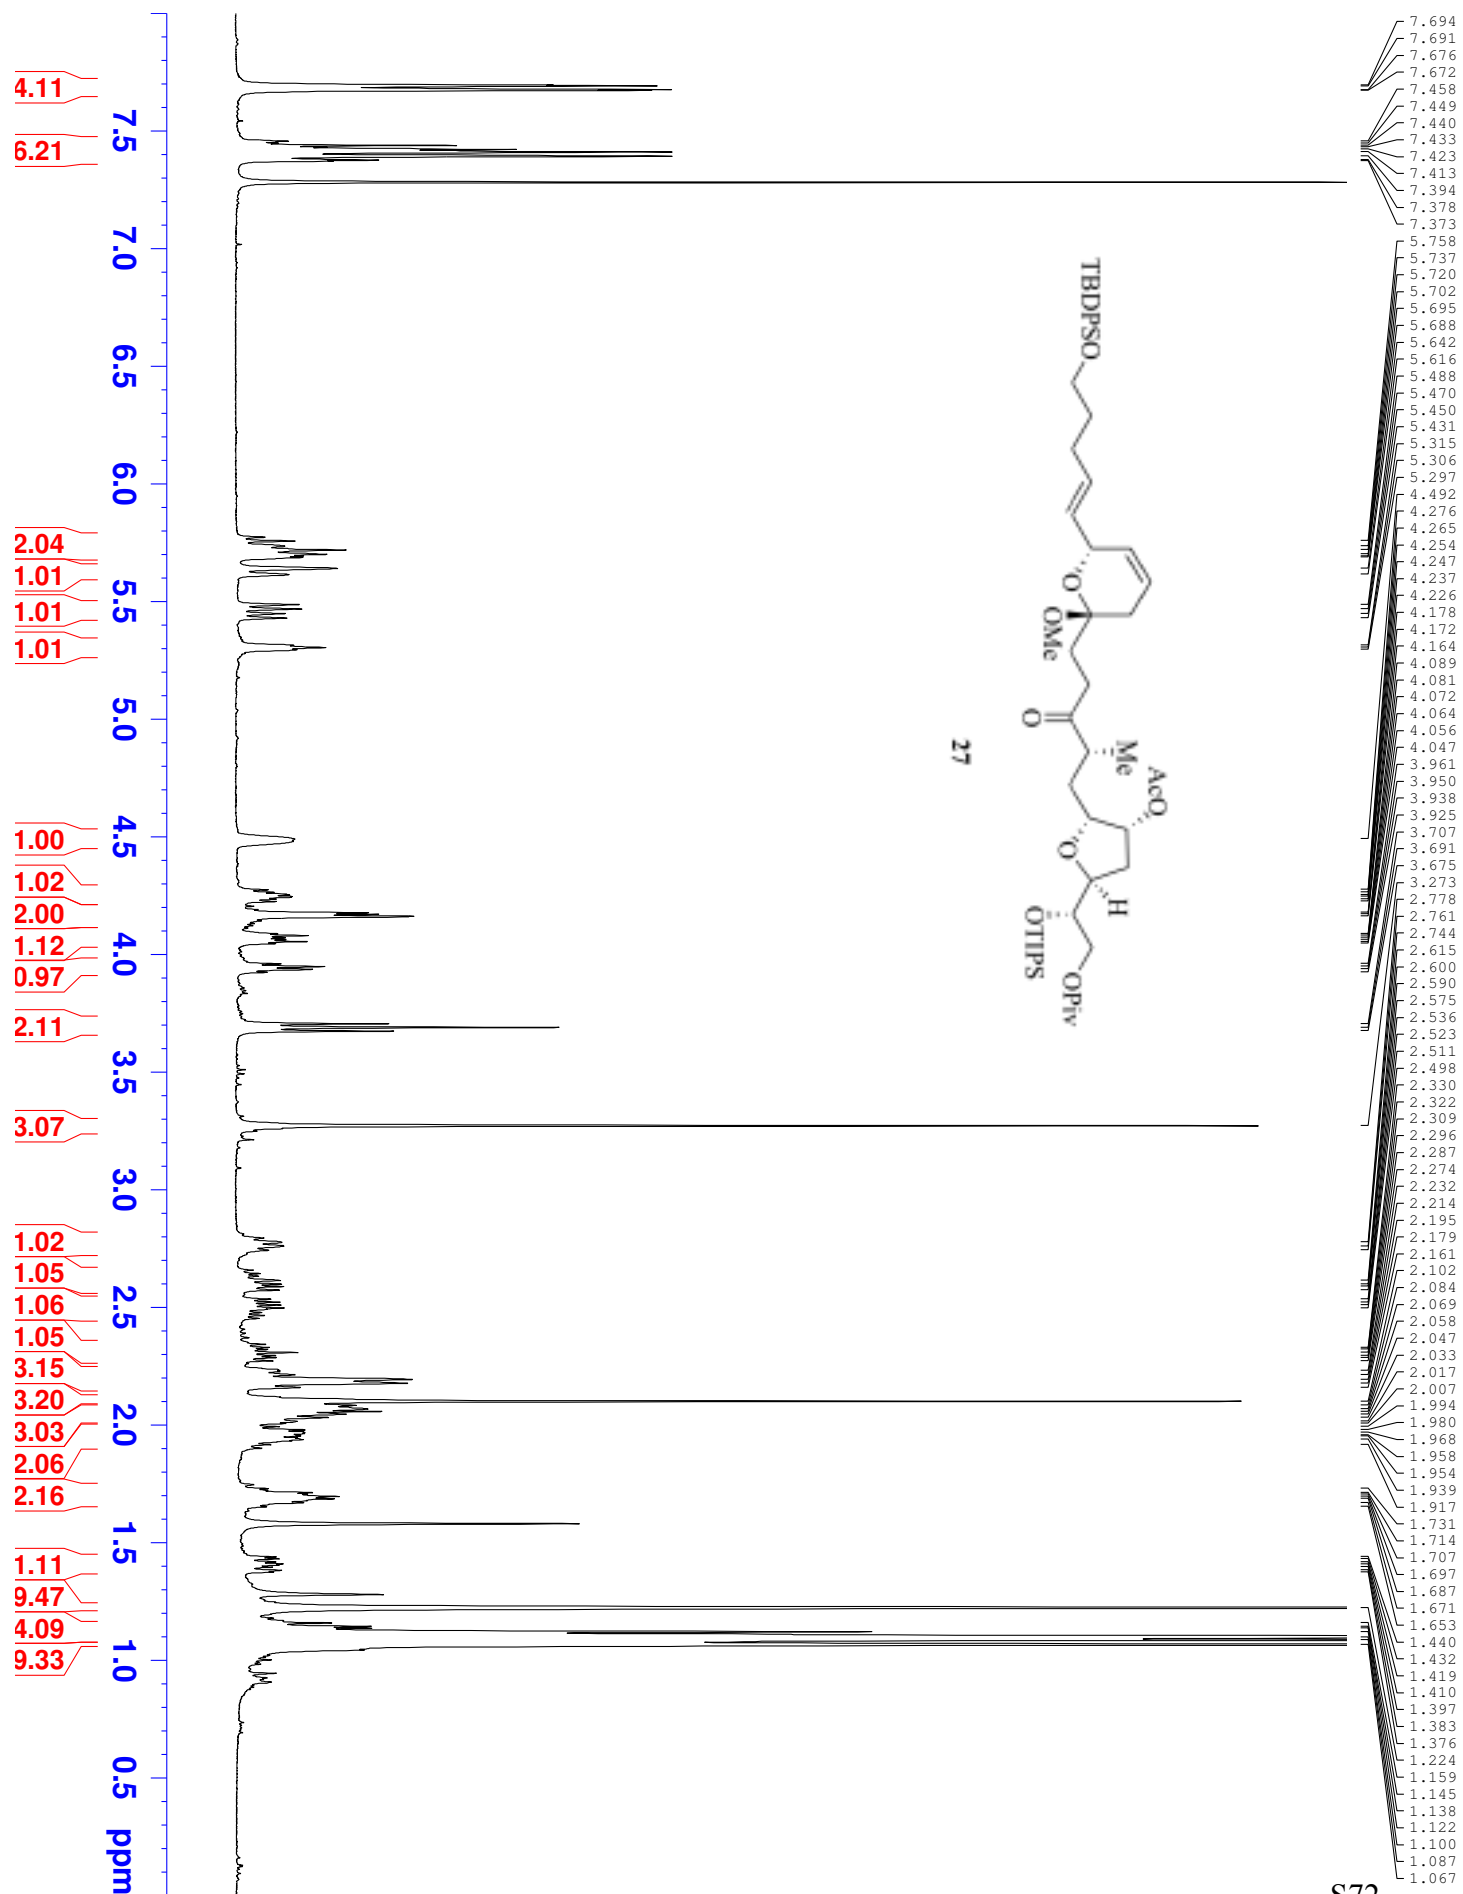



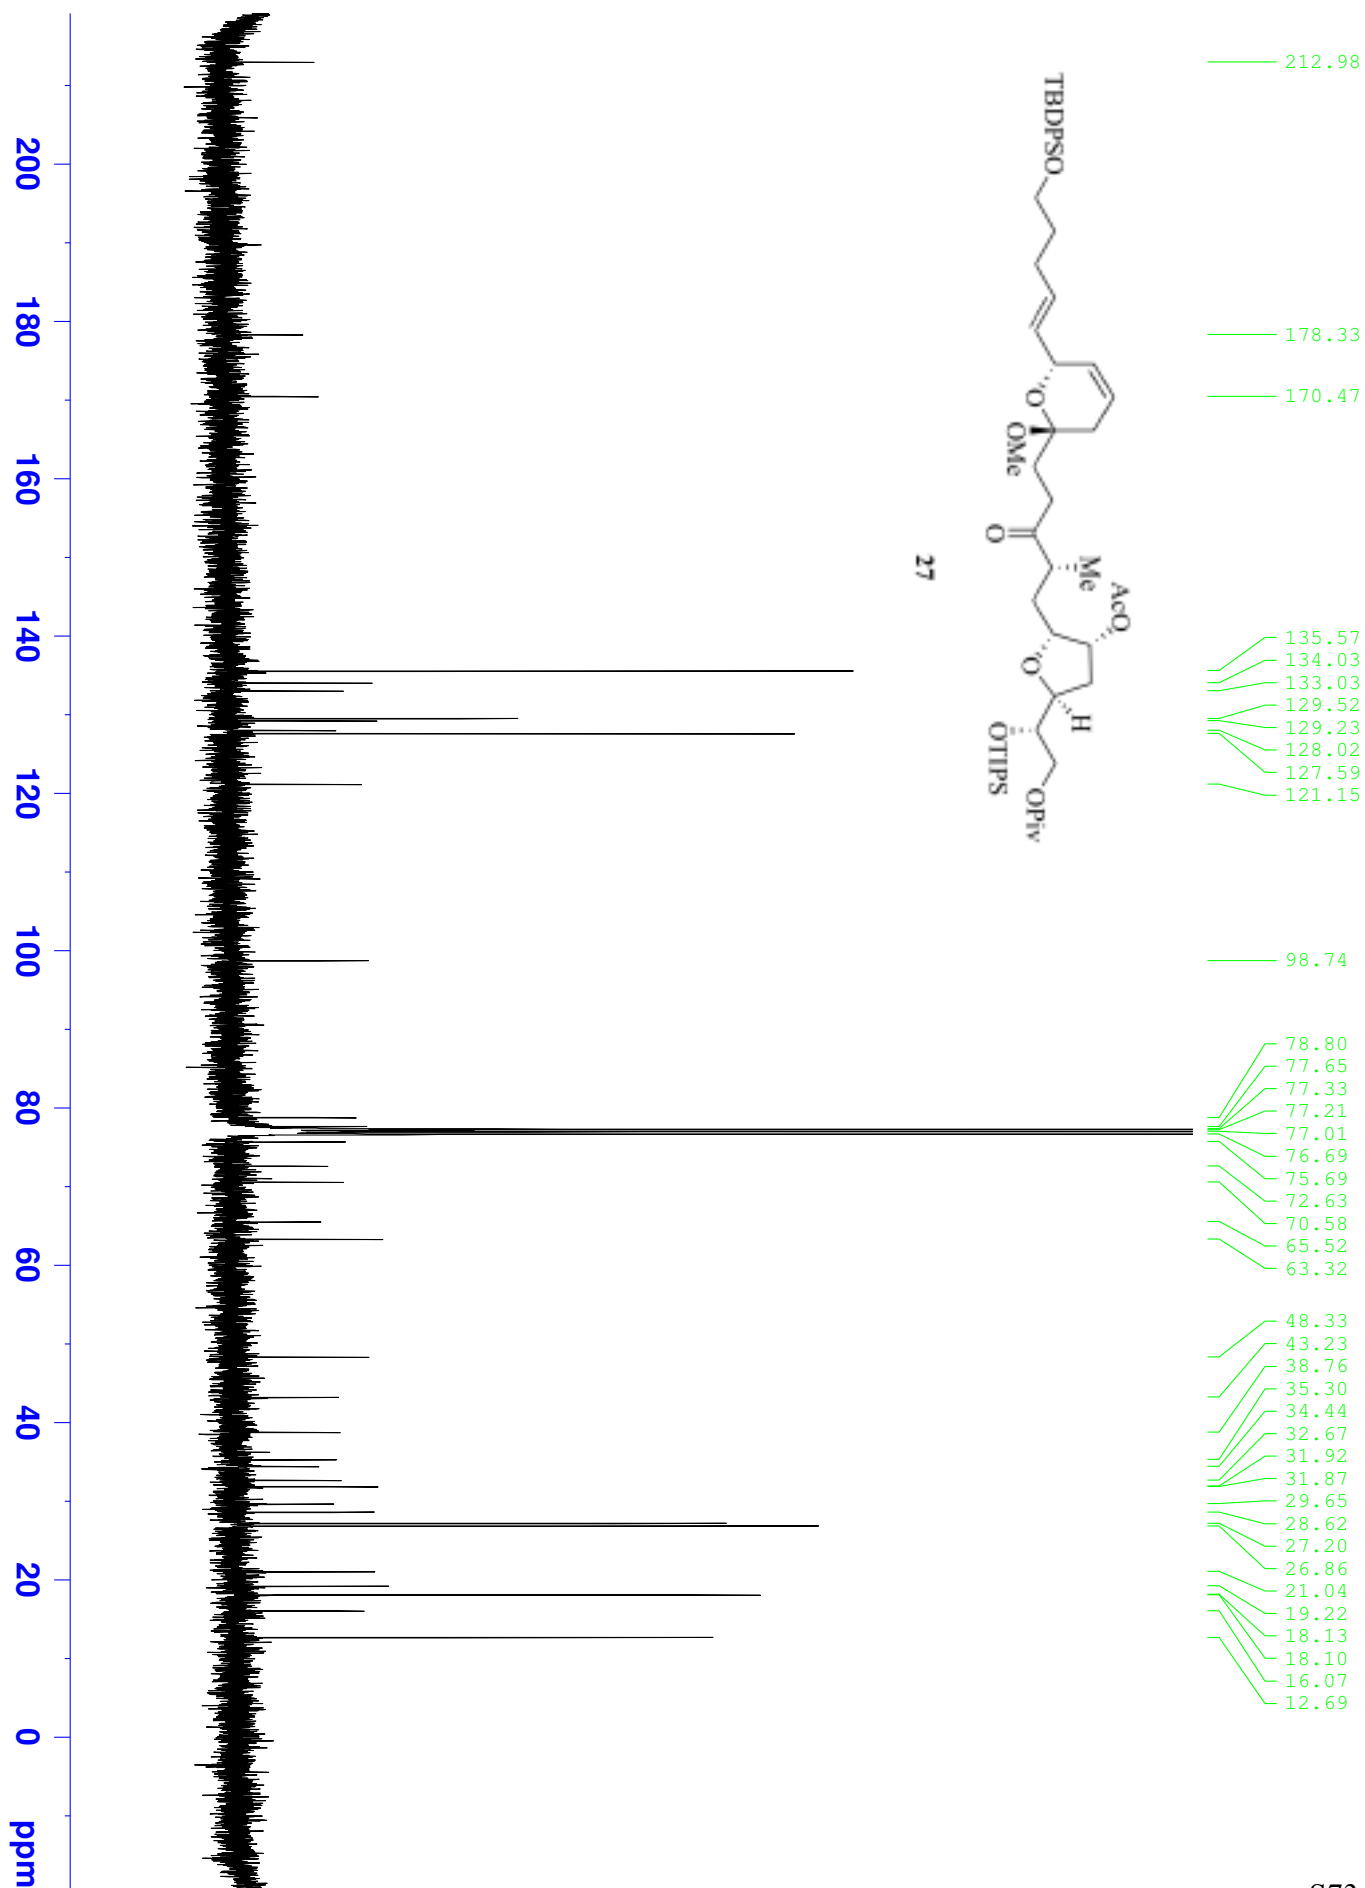



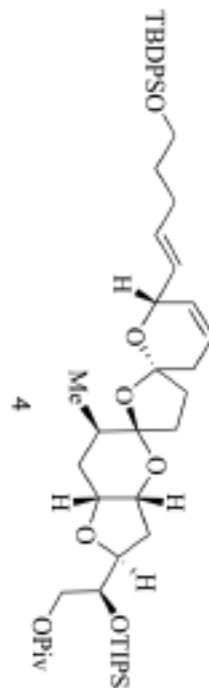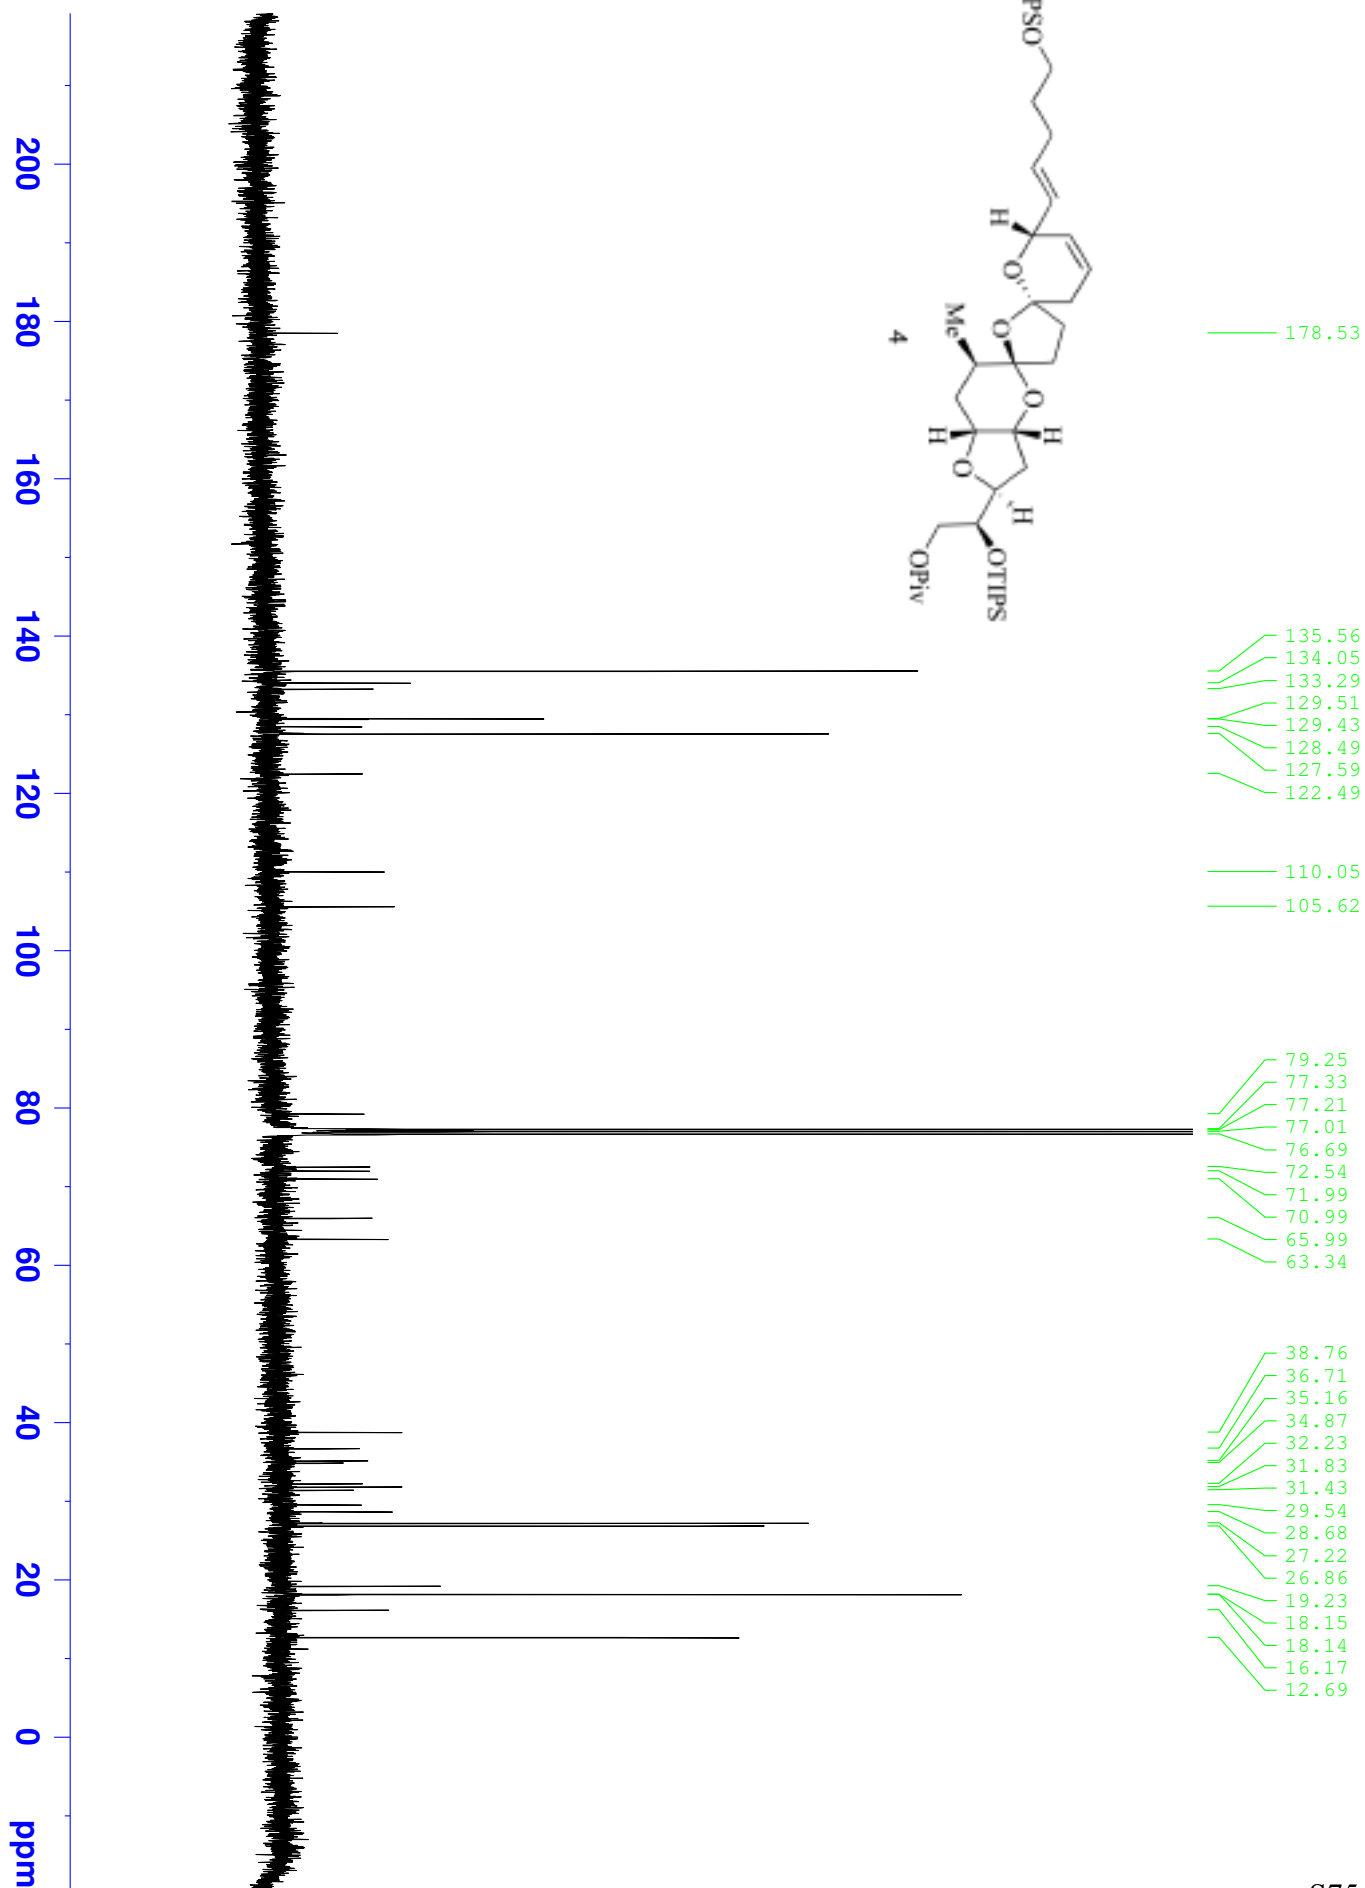

Supplement: Supplementary file 1 [file 4053856]
